# Supplementary material for: Evaluating spatial material distributions: adopting geospatial entropy definitions into resource management
Source: Royal Society of Chemistry journal article supplement (doi:10.1039/d3va00166k), 2024-01-01
Supplement: d3va00166k2.xlsx [file d3va00166k2.xlsx]

## Sheet: Data Flanders (All)
	NIS	Municipality	Inhabitants	Area (km2)	Translation to Lying Surfaces
1	11001	Aartselaar	14426	11.0373	2850.42
2	11002	Antwerpen	519627	203.983	102673
3	13001	Arendonk	13288	55.2417	2625.57
4	13002	Baarle-Hertog	2862	7.50837	565.501
5	13003	Balen	22808	73.0118	4506.62
6	13004	Beerse	18123	37.3346	3580.91
7	12002	Berlaar	11650	24.5188	2301.92
8	11004	Boechout	13369	20.6945	2641.57
9	12005	Bonheiden	15073	29.1756	2978.27
10	11005	Boom	18546	7.37461	3664.49
11	12007	Bornem	21350	46.2704	4218.53
12	11007	Borsbeek	10949	3.9127	2163.41
13	11008	Brasschaat	38219	38.6018	7551.67
14	11009	Brecht	29448	91.3119	5818.61
15	13006	Dessel	9605	27.3541	1897.85
16	12009	Duffel	17662	22.6477	3489.82
17	11013	Edegem	22252	8.70051	4396.76
18	11016	Essen	19154	47.6406	3784.63
19	13008	Geel	40671	110.172	8036.16
20	13010	Grobbendonk	11171	28.3732	2207.27
21	12014	Heist-op-den-Berg	42949	86.6582	8486.27
22	11018	Hemiksem	11619	5.53072	2295.79
23	13011	Herentals	28265	47.9473	5584.86
24	13012	Herenthout	9108	23.6174	1799.64
25	13013	Herselt	14520	52.3585	2869
26	13014	Hoogstraten	21394	105.385	4227.23
27	11021	Hove (Antwerpen)	8277	5.99472	1635.45
28	13016	Hulshout	10471	17.3899	2068.96
29	11022	Kalmthout	18872	59.4998	3728.91
30	23039	Kapellen	26981	37.2608	5331.16
31	13017	Kasterlee	18878	72.2128	3730.09
32	11024	Kontich	21198	23.8635	4188.5
33	13053	Laakdal	16183	42.4284	3197.59
34	12021	Lier	36631	49.7831	7237.9
35	13019	Lille	16559	59.5767	3271.88
36	11025	Lint	8640	5.59149	1707.17
37	11057	Malle	15599	51.902	3082.2
38	12025	Mechelen	86891	65.7376	17168.7
39	13021	Meerhout	10322	36.5375	2039.52
40	13023	Merksplas	8584	44.641	1696.11
41	13025	Mol	37012	114.601	7313.18
42	11029	Mortsel	26152	7.77803	5167.36
43	11030	Niel	10545	5.3101	2083.58
44	12026	Nijlen	22932	39.1663	4531.12
45	13029	Olen	12558	23.1869	2481.33
46	13031	Oud-Turnhout	13968	39.2172	2759.93
47	12029	Putte	17925	35.1938	3541.79
48	12041	Puurs	26141	49.1	5165.18
49	11035	Ranst	19186	43.7511	3790.95
50	13035	Ravels	15007	95.0849	2965.22
51	13036	Retie	11498	48.5451	2271.88
52	13037	Rijkevorsel	12173	46.9022	2405.26
53	11037	Rumst	15050	20.2056	2973.72
54	11038	Schelle	8526	7.65682	1684.65
55	11039	Schilde	19870	36.0486	3926.1
56	11040	Schoten	34307	29.5709	6778.7
57	12035	Sint-Katelijne-Waver	21016	36.1592	4152.54
58	11044	Stabroek	18784	21.5209	3711.52
59	13040	Turnhout	45252	56.6279	8941.32
60	13044	Vorselaar	7936	27.6379	1568.07
61	13046	Vosselaar	11341	11.8539	2240.86
62	13049	Westerlo	25101	55.4444	4959.69
63	11050	Wijnegem	9983	7.90736	1972.54
64	12040	Willebroek	26820	27.4239	5299.35
65	11052	Wommelgem	12943	12.988	2557.4
66	11053	Wuustwezel	21202	89.4042	4189.29
67	11054	Zandhoven	13066	40.1325	2581.7
68	11055	Zoersel	22062	38.6432	4359.22
69	11056	Zwijndrecht	19154	20.159	3784.63
70	73001	Alken	11626	28.221	2297.17
71	71002	As	8234	22.1002	1626.95
72	71004	Beringen	46584	78.6004	9204.51
73	73006	Bilzen	32465	76.0842	6414.74
74	72003	Bocholt	13143	59.3453	2596.92
75	73009	Borgloon	11009	51.3445	2175.26
76	72004	Bree	16167	64.9351	3194.43
77	71011	Diepenbeek	19085	41.3833	3770.99
78	72041	Dilsen-Stokkem	20685	66.0283	4087.14
79	71016	Genk	66415	87.6326	13122.9
80	71017	Gingelom	8389	56.3933	1657.58
81	71020	Halen	9485	36.625	1874.14
82	71069	Ham	10975	32.7022	2168.54
83	72037	Hamont-Achel	14298	43.771	2825.13
84	71022	Hasselt	78685	102.701	15547.3
85	72038	Hechtel-Eksel	12508	76.6914	2471.45
86	73022	Heers	7337	53.0853	1449.71
87	71024	Herk-de-Stad	12650	43.0336	2499.51
88	73028	Herstappe	79	1.34963	15.6096
89	71070	Heusden-Zolder	33873	53.3761	6692.95
90	73032	Hoeselt	9730	30.1122	1922.54
91	72039	Houthalen-Helchteren	30550	78.1871	6036.36
92	72018	Kinrooi	12193	54.856	2409.21
93	73040	Kortessem	8436	34.0158	1666.86
94	73042	Lanaken	25878	58.838	5113.22
95	71034	Leopoldsburg	15836	22.548	3129.03
96	72020	Lommel	34234	102.35	6764.28
97	71037	Lummen	14969	53.6579	2957.72
98	72021	Maaseik	25297	77.0049	4998.42
99	73107	Maasmechelen	38903	77.0019	7686.82
100	71045	Nieuwerkerken (Hasselt)	6998	22.5214	1382.73
101	72042	Oudsbergen	23608	116.38	4664.69
102	72030	Peer	16298	87.2703	3220.31
103	72043	Pelt	15685	40.8322	3099.19
104	73066	Riemst	16754	58.0787	3310.41
105	71053	Sint-Truiden	40652	107.014	8032.4
106	71057	Tessenderlo	18726	51.6826	3700.06
107	73083	Tongeren	31140	87.8401	6152.93
108	73109	Voeren	4173	50.631	824.541
109	73098	Wellen	7354	26.813	1453.07
110	71066	Zonhoven	21321	39.6694	4212.8
111	71067	Zutendaal	7282	31.9821	1438.85
112	41002	Aalst (Aalst)	87272	78.5939	17244
113	44084	Aalter	20933	82.3905	4136.14
114	43002	Assenede	14294	87.5459	2824.34
115	42003	Berlare	15090	38.2188	2981.62
116	46003	Beveren (Sint-Niklaas)	49039	153.127	9689.59
117	45059	Brakel	14803	57.0276	2924.92
118	42004	Buggenhout	14656	25.6083	2895.87
119	44012	De Pinte	10876	17.8038	2148.98
120	44083	Deinze	31200	76.0588	6164.79
121	41011	Denderleeuw	20549	13.8836	4060.26
122	42006	Dendermonde	45862	56.449	9061.85
123	44013	Destelbergen	18518	26.6661	3658.96
124	43005	Eeklo	21267	30.4294	4202.13
125	41082	Erpe-Mere	20135	34.378	3978.46
126	44019	Evergem	35622	75.2866	7038.53
127	44020	Gavere	12902	31.6371	2549.3
128	44021	Gent	263663	157.774	52097
129	41018	Geraardsbergen	33637	80.0458	6646.31
130	41024	Haaltert	18578	30.552	3670.82
131	42008	Hamme (Dendermonde)	24937	40.7162	4927.29
132	41027	Herzele	18185	47.8477	3593.16
133	45062	Horebeke	2022	11.2256	399.526
134	43007	Kaprijke	6435	33.6252	1271.49
135	45060	Kluisbergen	6575	30.5801	1299.15
136	46013	Kruibeke	16844	33.4388	3328.2
137	45068	Kruisem	15741	71.62	3110.25
138	42010	Laarne	12354	32.6192	2441.02
139	42011	Lebbeke	19538	27.3644	3860.5
140	41034	Lede	18865	29.9117	3727.52
141	45063	Lierde	6579	26.3652	1299.94
142	44085	Lievegem	26307	80.76	5197.98
143	44034	Lochristi	22604	60.7173	4466.31
144	46014	Lokeren	42034	68.2676	8305.47
145	45064	Maarkedal	6336	46.1467	1251.93
146	43010	Maldegem	23956	95.6269	4733.45
147	44040	Melle	11811	15.3586	2333.73
148	44043	Merelbeke	24750	36.9937	4890.34
149	44045	Moerbeke (Gent)	6563	37.9098	1296.78
150	44048	Nazareth	11701	35.4455	2311.99
151	41048	Ninove	39245	73.1067	7754.4
152	44052	Oosterzele	13685	43.5607	2704.01
153	45035	Oudenaarde	31606	68.8861	6245.01
154	45041	Ronse	26362	34.6979	5208.85
155	46020	Sint-Gillis-Waas	19491	55.5419	3851.22
156	43014	Sint-Laureins	6814	74.6843	1346.37
157	41063	Sint-Lievens-Houtem	10400	27.0391	2054.93
158	44064	Sint-Martens-Latem	8365	14.4482	1652.84
159	46021	Sint-Niklaas (Sint-Niklaas)	78524	84.199	15515.5
160	46024	Stekene	18686	45.2453	3692.16
161	46025	Temse	30195	40.1736	5966.21
162	42023	Waasmunster	10931	32.2193	2159.85
163	44073	Wachtebeke	7808	34.6551	1542.78
164	42025	Wetteren	26000	36.9842	5137.32
165	42026	Wichelen	11649	23.2138	2301.72
166	45061	Wortegem-Petegem	6395	42.4794	1263.58
167	42028	Zele	21326	33.2414	4213.79
168	43018	Zelzate	12893	13.7339	2547.52
169	41081	Zottegem	26684	57.4356	5272.48
170	44081	Zulte	15782	32.7507	3118.36
171	45065	Zwalm	8166	33.9073	1613.52
172	24001	Aarschot	30178	63.0335	5962.85
173	23105	Affligem	13351	17.8995	2638.02
174	23002	Asse	33487	50.2416	6616.68
175	23003	Beersel	25338	30.4292	5006.52
176	24007	Begijnendijk	10254	17.6501	2026.08
177	24008	Bekkevoort	6332	37.2636	1251.14
178	24009	Bertem	10140	29.9531	2003.56
179	23009	Bever	2178	19.2188	430.35
180	24011	Bierbeek	10161	38.8965	2007.71
181	24014	Boortmeerbeek	12628	18.7751	2495.16
182	24016	Boutersem	8235	31.1611	1627.15
183	24020	Diest	24229	58.6683	4787.39
184	23016	Dilbeek	43420	41.4441	8579.33
185	23098	Drogenbos	5651	2.53042	1116.58
186	23023	Galmaarden	8836	35.2659	1745.9
187	24028	Geetbets	6136	35.555	1212.41
188	24137	Glabbeek	5321	26.9709	1051.37
189	23024	Gooik	9187	40.2612	1815.25
190	23025	Grimbergen	37951	38.6037	7498.72
191	24033	Haacht	14854	30.7083	2934.99
192	23027	Halle (Halle-Vilvoorde)	40166	45.0226	7936.38
193	24038	Herent	21916	32.6545	4330.37
194	23032	Herne	6699	44.7162	1323.65
195	24041	Hoegaarden	6862	34.0116	1355.86
196	23033	Hoeilaart	11404	20.4747	2253.31
197	24043	Holsbeek	10056	38.7714	1986.96
198	24045	Huldenberg	9943	40.0268	1964.63
199	23038	Kampenhout	12128	33.7098	2396.36
200	11023	Kapelle-op-den-Bos	9499	15.3944	1876.9
201	24048	Keerbergen	12954	18.5447	2559.57
202	24054	Kortenaken	7889	49.4675	1558.78
203	24055	Kortenberg	20288	34.8138	4008.69
204	23099	Kraainem	13848	5.86751	2736.22
205	24059	Landen	16096	53.2349	3180.4
206	23104	Lennik	9094	31.1432	1796.88
207	24062	Leuven	102120	57.6086	20177.8
208	23044	Liedekerke	13393	10.177	2646.31
209	23100	Linkebeek	4695	4.19267	927.682
210	24133	Linter	7264	36.8996	1435.29
211	23045	Londerzeel	18859	36.5228	3726.34
212	24066	Lubbeek	14556	45.2624	2876.11
213	23047	Machelen (Halle-Vilvoorde)	15598	11.5078	3082
214	23050	Meise	19624	35.1161	3877.49
215	23052	Merchtem	16766	36.9082	3312.78
216	23060	Opwijk	14746	19.9352	2913.65
217	24086	Oud-Heverlee	11085	31.1566	2190.28
218	23062	Overijse	25496	45.0064	5037.74
219	23064	Pepingen	4537	35.9775	896.463
220	23097	Roosdaal	11665	21.9249	2304.88
221	24094	Rotselaar	17023	37.2072	3363.56
222	24134	Scherpenheuvel-Zichem	23069	51.211	4558.19
223	23101	Sint-Genesius-Rode	18511	22.7768	3657.58
224	23077	Sint-Pieters-Leeuw	34605	40.6311	6837.58
225	23081	Steenokkerzeel	12278	23.5308	2426
226	23086	Ternat	16009	24.7137	3163.21
227	24104	Tervuren	22699	33.5131	4485.08
228	24135	Tielt-Winge	10782	44.58	2130.41
229	24107	Tienen	35278	72.9251	6970.56
230	24109	Tremelo	14913	21.9122	2946.65
231	23088	Vilvoorde	45472	21.5637	8984.79
232	23102	Wemmel	16793	8.76262	3318.12
233	23103	Wezembeek-Oppem	14262	6.85515	2818.02
234	23094	Zaventem	34764	27.7239	6869
235	23096	Zemst	23258	43.2705	4595.53
236	24130	Zoutleeuw	8575	46.7912	1694.33
237	38002	Alveringem	4992	80.7684	986.366
238	34002	Anzegem	14778	42.3571	2919.98
239	37020	Ardooie	9077	34.9314	1793.52
240	34003	Avelgem	10206	22.117	2016.6
241	31003	Beernem	15816	72.452	3125.07
242	31004	Blankenberge	20453	17.7472	4041.3
243	35002	Bredene	18137	13.0628	3583.68
244	31005	Brugge	118613	139.093	23436.7
245	31006	Damme	11016	90.3443	2176.64
246	35029	De Haan	12698	42.0459	2508.99
247	38008	De Panne	11142	24.2811	2201.54
248	34009	Deerlijk	12076	17.0085	2386.09
249	37002	Dentergem	8612	26.1403	1701.64
250	32003	Diksmuide	16842	150.627	3327.8
251	35005	Gistel	12158	42.8206	2402.29
252	34013	Harelbeke	28487	29.3859	5628.73
253	33039	Heuvelland	7924	94.838	1565.7
254	36006	Hooglede	9973	38.083	1970.56
255	32006	Houthulst	10104	56.0273	1996.44
256	35006	Ichtegem	14040	45.7348	2774.16
257	33011	Ieper	34992	131.441	6914.05
258	36007	Ingelmunster	11130	16.4095	2199.17
259	36008	Izegem	28311	25.5757	5593.95
260	31012	Jabbeke	13867	53.7273	2739.97
261	31043	Knokke-Heist	33071	56.7003	6534.48
262	32010	Koekelare	8758	39.4446	1730.49
263	38014	Koksijde	21869	45.0866	4321.08
264	32011	Kortemark	12685	55.4713	2506.42
265	34022	Kortrijk	77085	80.6781	15231.2
266	34023	Kuurne	13673	10.1458	2701.64
267	33040	Langemark-Poelkapelle	7822	53.1148	1545.54
268	36010	Ledegem	9686	24.8443	1913.85
269	34025	Lendelede	5786	13.289	1143.25
270	36011	Lichtervelde	8940	26.1316	1766.45
271	32030	Lo-Reninge	3290	63.4576	650.069
272	34027	Menen	33525	33.1713	6624.18
273	33016	Mesen	1043	3.54887	206.086
274	37007	Meulebeke	10828	29.4968	2139.5
275	35011	Middelkerke	19572	76.0285	3867.22
276	36012	Moorslede	11440	35.4755	2260.42
277	38016	Nieuwpoort	11628	31.4049	2297.57
278	35013	Oostende	71611	37.7622	14149.6
279	31022	Oostkamp	23801	80.156	4702.83
280	37010	Oostrozebeke	7950	16.7283	1570.84
281	35014	Oudenburg	9504	35.6632	1877.89
282	37011	Pittem	6716	34.6734	1327.01
283	33021	Poperinge	19711	120.399	3894.68
284	36015	Roeselare	63413	60.4458	12529.7
285	37012	Ruiselede	5364	30.5411	1059.87
286	34043	Spiere-Helkijn	2071	10.8114	409.208
287	36019	Staden	11512	46.8315	2274.65
288	37015	Tielt (Tielt)	20597	68.8884	4069.75
289	31033	Torhout	20458	45.3621	4042.28
290	38025	Veurne	12093	97.142	2389.45
291	33041	Vleteren	3653	38.5198	721.794
292	34040	Waregem	38344	44.4979	7576.37
293	33029	Wervik	18900	43.727	3734.44
294	34041	Wevelgem	31567	39.1975	6237.3
295	37017	Wielsbeke	9833	21.9729	1942.9
296	37018	Wingene	14422	68.4934	2849.63
297	31040	Zedelgem	22846	60.6754	4514.13
298	33037	Zonnebeke	12498	68.0586	2469.47
299	31042	Zuienkerke	2709	49.0123	535.27
300	34042	Zwevegem	24807	63.6374	4901.6
SOM			6579382	13465.2	1.30002e+06

## Sheet: Distnace Matrix
Gemeente	Aartselaar	Antwerpen	Arendonk	Baarle-Hertog	Balen	Beerse	Berlaar	Boechout	Bonheiden	Boom	Bornem	Borsbeek	Brasschaat	Brecht	Dessel	Duffel	Edegem	Essen	Geel	Grobbendonk	Heist-op-den-Berg	Hemiksem	Herentals	Herenthout	Herselt	Hoogstraten	Hove (Antwerpen)	Hulshout	Kalmthout	Kapellen	Kasterlee	Kontich	Laakdal	Lier	Lille	Lint	Malle	Mechelen	Meerhout	Merksplas	Mol	Mortsel	Niel	Nijlen	Olen	Oud-Turnhout	Putte	Puurs	Ranst
Aartselaar		9.61	52.81	46.31	54.78	38.44	19.04	7.86	16.71	4.75	10.8	9.78	18.94	29.73	52.03	9.55	4.77	37.55	42.16	25.12	24.72	3.56	31.44	25.75	35.8	39.39	6.28	28.98	28.51	20.26	42.12	4.21	43.73	12.82	32.69	7.7	29.09	13.62	48.26	41.61	51.3	5.79	4.48	19.99	33.02	46.44	19.38	9.58	13.91
Antwerpen	9.61		48.63	39.73	53.74	33.17	21.1	9.11	24.12	14.35	17.62	6.27	10.03	21.84	49.55	15.67	7.61	27.95	41.26	23.37	27.78	9.49	30.28	26.11	38.29	31.9	8.65	31.49	18.97	10.67	39.28	10.22	44.95	15.25	29.32	12.2	23.14	22.2	48.05	35.61	49.78	6.76	13.04	19.7	32.91	41.89	24.46	18.09	11.76
Arendonk	52.81	48.63		16.1	18.2	15.98	37.34	44.96	50.08	55.77	63.61	43.87	41.24	31.04	9.61	47.29	48.09	45.55	18.65	28.29	36.97	55.46	23.83	30.51	33.23	24	46.54	34.29	42.73	45.01	12.15	49.08	27.75	41.55	20.17	46.25	25.99	53.58	21.19	15.64	14.73	47.25	57.21	33.9	25.23	6.87	43.38	61.87	38.93
Baarle-Hertog	46.31	39.73	16.1		32.66	9.92	35.87	38.99	48.85	50.21	56.66	36.57	30.56	18.65	24.11	43.54	41.6	30.16	27.47	26.23	38.39	48.16	25.74	30.95	39.31	9.17	40.45	37.43	29	33.31	18.94	43.36	37.25	37.79	18.76	41.39	17.24	51.12	33	5.51	28.37	40.51	50.76	31.23	29.12	11.43	43.08	55.87	33.01
Balen	54.78	53.74	18.2	32.66		27.73	36.16	47.31	46.44	56.36	65.14	47.84	49.18	42.18	8.72	46.85	50.59	59.03	12.63	30.4	32.54	58.05	23.57	29.08	23.93	38.44	48.81	28.47	53.97	53.65	16.34	50.6	15.23	42.04	25.53	47.21	35.13	50.9	7.57	29.96	4.56	50.13	58.67	34.89	21.82	21.25	39.65	62.43	42.24
Beerse	38.44	33.17	15.98	9.92	27.73		26.21	30.78	39.28	41.96	49.11	28.99	25.3	15.31	20.28	34.54	33.67	31.35	19.54	16.49	28.48	40.72	15.93	21.04	29.83	11.07	32.32	27.56	27.2	29.03	11.73	35.1	28.91	28.71	8.84	32.75	10.13	41.84	26.07	4.44	23.18	32.69	42.92	21.73	19.5	9.11	33.32	47.86	24.66
Berlaar	19.04	21.1	37.34	35.87	36.16	26.21		12.51	13.11	20.21	29.04	14.92	22.52	25.91	34.52	10.71	15.5	41.12	23.69	9.73	6.77	22.51	13.8	7.24	17.28	32.22	13.72	10.42	32.38	27.35	25.5	14.83	24.72	6.32	17.98	11.33	20.52	16.24	29.36	30.41	33.01	15.45	22.63	4.89	14.36	31.94	7.36	26.28	10.32
Boechout	7.86	9.11	44.96	38.99	47.31	30.78	12.51		15.71	11.23	18.67	4.14	14.63	23.52	44.26	7.22	3.29	34.32	34.68	17.33	18.97	10.81	23.82	18.53	29.78	32.63	1.59	22.91	25.03	17.59	34.29	4.37	37.06	6.31	24.83	3.63	21.76	14.92	41.02	34.11	43.69	2.95	12.26	12.42	25.72	38.61	15.36	17.09	6.12
Bonheiden	16.71	24.12	50.08	48.85	46.44	39.28	13.11	15.71		14.51	22.77	19.82	30.11	36.98	46.3	8.54	16.52	49.81	34.72	22.83	13.95	19.92	26.27	19.57	23.66	44.54	15.6	17.98	40.54	33.3	38.04	14.04	32.7	12.19	31.08	12.14	32.8	4.87	39.06	43.43	43.99	17.39	17.83	17.62	25.67	44.94	6.89	18.97	18.64
Boom	4.75	14.35	55.77	50.21	56.36	41.96	20.21	11.23	14.51		8.96	14.04	23.64	34	54.28	9.6	8.78	42.3	43.85	27.63	24.98	6.27	33.48	27.32	35.96	43.63	9.76	29.34	33.26	25.01	44.65	6.87	44.38	14.53	35.6	9.49	32.97	10.48	49.53	45.34	53.13	9.98	3.33	22.17	34.55	49.59	18.74	6.16	17.31
Bornem	10.8	17.62	63.61	56.66	65.14	49.11	29.04	18.67	22.77	8.96		20.17	27.65	39.34	62.72	18.53	15.53	44.1	52.58	35.85	33.94	8.49	42.02	36.06	44.91	49.29	17.08	38.3	35.79	27.54	52.88	14.72	53.34	23.12	43.49	17.98	39.55	18.18	58.4	52.13	61.8	16.44	6.51	30.59	43.32	57.21	27.61	4.05	24.69
Borsbeek	9.78	6.27	43.87	36.57	47.84	28.99	14.92	4.14	19.82	14.04	20.17		10.53	20.12	44.06	11.36	5.26	30.19	35.28	17.45	21.65	11.74	24.29	19.87	32.05	29.64	4.8	25.27	20.89	13.49	33.87	7.65	38.69	9.37	24.05	7.77	19.4	19.01	41.97	31.96	43.99	4.07	14.21	13.47	26.75	37.31	18.95	19.35	5.62
Brasschaat	18.94	10.03	41.24	30.56	49.18	25.3	22.52	14.63	30.11	23.64	27.65	10.53		12.11	43.72	21.79	15.32	19.71	37.34	20.34	29.11	19.46	26.93	24.9	38.09	22.25	15.28	31.86	10.43	4.66	33.49	17.96	43.02	18.61	23.69	18.25	15.26	29.53	44.53	27	44.87	14.1	22.85	19.07	30.42	34.37	28.21	28	12.38
Brecht	29.73	21.84	31.04	18.65	42.18	15.31	25.91	23.52	36.98	34	39.34	20.12	12.11		35.36	29.72	25.39	17.58	31.9	19.02	31.2	30.92	23.57	24.75	37.31	10.14	24.7	32.45	11.92	14.67	25.84	27.67	39.7	24.8	17.61	26.7	7.6	37.78	39.08	15.78	37.65	24.18	34	21.16	27.64	24.26	33.01	39.2	18.54
Dessel	52.03	49.55	9.61	24.11	8.72	20.28	34.52	44.26	46.3	54.28	62.72	44.06	43.72	35.36		45.11	47.53	51.57	11.92	26.93	32.48	55.05	20.82	27.29	26.35	30.48	45.82	29.02	47.28	47.97	10.31	48	19.4	39.75	20.29	44.81	28.88	50.35	12.1	21.87	5.19	46.89	56.21	32.14	20.63	12.8	39.42	60.44	38.63
Duffel	9.55	15.67	47.29	43.54	46.85	34.54	10.71	7.22	8.54	9.6	18.53	11.36	21.79	29.72	45.11		8.13	41.5	34.4	19.01	15.48	13.09	24.3	17.92	26.53	38.13	7.08	19.82	32.21	24.8	35.77	5.94	34.82	5.84	27.29	3.61	26.66	8.07	8.07	38.34	43.72	8.91	12.32	13.39	25.07	41.44	9.83	15.59	11.2
Edegem	4.77	7.61	48.09	41.6	50.59	33.67	15.5	3.29	16.52	8.78	15.53	5.26	15.32	25.39	47.53	8.13		34.65	37.96	20.6	21.74	7.53	27.11	21.75	32.69	34.86	1.81	25.8	25.42	17.49	37.53	2.73	40.17	9.19	28	4.88	24.37	14.73	44.27	36.86	46.98	1.23	9.25	15.7	28.96	41.68	17.42	14.27	9.16
Essen	37.55	27.95	45.55	30.16	59.03	31.35	41.12	34.32	49.81	42.3	44.1	30.19	19.71	17.58	51.57	41.5	34.65		49.37	35.99	47.23	37.05	41.08	41.54	54.5	21.55	34.85	49.14	9.29	17.3	42.77	37.37	57.28	38.09	35.15	37.95	25.18	49.17	56.47	30.04	54.47	33.49	40.78	36.88	45.12	39.35	47.48	45.56	31.64
Geel	42.16	41.26	18.65	27.47	12.63	19.54	23.69	34.68	34.72	43.85	52.58	35.28	37.34	31.9	11.92	34.4	37.96	49.37		17.89	20.79	45.42	10.99	16.49	14.71	30.57	36.18	17.15	43.23	41.93	8.55	38	9.84	29.46	14.35	34.62	24.41	38.96	7.25	23.12	9.35	37.51	46.09	22.26	9.34	17.15	27.84	49.95	29.67
Grobbendonk	25.12	23.37	28.29	26.23	30.4	16.49	9.73	17.33	22.83	27.63	35.85	17.45	20.34	19.02	26.93	19.01	20.6	35.99	17.89		12.8	28.13	6.93	5.77	18.52	23.4	18.9	13.45	28.15	24.99	17.04	21.14	22.69	13.27	8.37	18.09	12.21	25.69	24.77	20.75	26.55	19.99	29.35	5.62	10.09	22.49	16.85	33.78	11.87
Heist-op-den-Berg	24.72	27.78	36.97	38.39	32.54	28.48	6.77	18.97	13.95	24.98	33.94	21.65	29.11	31.2	32.48	15.48	21.74	47.23	20.79	12.8		28.27	13.4	7.45	11.08	36.2	20.01	4.37	38.61	33.46	24.82	20.62	19.45	12.65	19.67	17.16	24.91	18.37	25.25	32.9	30.04	21.85	27.8	10.35	11.93	32.5	7.12	30.73	17.07
Hemiksem	3.56	9.49	55.46	48.16	58.05	40.72	22.51	10.81	19.92	6.27	8.49	11.74	19.46	30.92	55.05	13.09	7.53	37.05	45.42	28.13	28.27		34.61	29.09	39.35	40.83	9.27	32.51	28.29	19.95	45.04	7.69	47.22	16.23	35.44	11.2	31.08	16.42	51.63	43.66	54.49	8.22	3.78	23.18	36.35	48.96	22.9	8.62	16.57
Herentals	31.44	30.28	23.83	25.74	23.57	15.93	13.8	23.82	26.27	33.48	42.02	24.29	26.93	23.57	20.82	24.3	27.11	41.08	10.99	6.93	13.4	34.61		6.71	14.32	25.38	25.35	11.71	33.92	31.57	11.78	27.33	16.39	18.96	7.3	24.06	16.05	29.92	17.85	20.36	19.88	26.6	35.51	11.45	4.1	19.11	19.55	39.64	18.68
Herenthout	25.75	26.11	30.51	30.95	29.08	21.04	7.24	18.53	19.57	27.32	36.06	19.87	24.9	24.75	27.29	17.92	21.75	41.54	16.49	5.77	7.45	29.09	6.71		13.23	28.93	19.95	7.69	33.44	29.5	18.5	21.55	18.84	12.97	12.26	18.13	17.96	23.22	22.53	25.45	25.81	21.44	29.59	6.41	7.27	25.54	12.92	33.44	14.38
Herselt	35.8	38.29	33.23	39.31	23.93	29.83	17.28	29.78	23.66	35.96	44.91	32.05	38.09	37.31	26.35	26.53	32.69	54.5	14.71	18.52	11.08	39.35	14.32	13.23		39.69	30.93	6.88	46.61	42.66	21.88	31.69	9.16	23.52	21.57	28.21	30.01	28.44	16.36	34.15	22.6	32.71	38.85	19.17	10.39	30.65	17.45	41.58	26.94
Hoogstraten	39.39	31.9	24	9.17	38.44	11.07	32.22	32.63	44.54	43.63	49.29	29.64	22.25	10.14	30.48	38.13	34.86	21.55	30.57	23.4	36.2	40.83	25.38	28.93	39.69		33.96	36.29	19.84	24.53	22.77	36.94	39.75	32.7	18.14	35.49	11.76	46.07	37.14	8.63	33.92	33.69	43.75	27.34	29.34	17.93	39.59	48.94	27.05
Hove (Antwerpen)	6.28	8.65	46.54	40.45	48.81	32.32	13.72	1.59	15.6	9.76	17.08	4.8	15.28	24.7	45.82	7.08	1.81	34.85	36.18	18.9	20.01	9.27	25.35	19.95	30.93	33.96		24.05	25.57	17.88	35.87	2.98	38.37	7.42	26.41	3.54	23.21	14.32	42.47	35.61	45.22	1.94	10.68	13.92	27.17	40.19	15.94	15.55	7.68
Hulshout	28.98	31.49	34.29	37.43	28.47	27.56	10.42	22.91	17.98	29.34	38.3	25.27	31.86	32.45	29.02	19.82	25.8	49.14	17.15	13.45	4.37	32.51	11.71	7.69	6.88	36.29	24.05		40.86	36.35	22.22	24.84	15.09	16.63	18.76	21.35	25.59	22.55	21.08	32	26.21	25.83	32.14	12.78	9.1	30.42	11.3	35.1	20.3
Kalmthout	28.51	18.97	42.73	29	53.97	27.2	32.38	25.03	40.54	33.26	35.79	20.89	10.43	11.92	47.28	32.21	25.42	9.29	43.23	28.15	38.61	28.29	33.92	33.44	46.61	19.84	25.57	40.86		8.34	37.66	28.12	50.3	29.91	28.89	28.65	18.9	39.88	50.47	27.2	49.45	24.24	31.96	28.29	37.81	36.04	38.04	36.89	22.52
Kapellen	20.26	10.67	45.01	33.31	53.65	29.03	27.35	17.59	33.3	25.01	27.54	13.49	4.66	14.67	47.97	24.8	17.49	17.3	41.93	24.99	33.46	19.95	31.57	29.5	42.66	24.53	17.88	36.35	8.34		37.82	20.21	47.68	22.36	28.13	21.19	19.22	32.16	49.13	30.27	49.31	16.36	23.63	23.57	35.07	38.14	32.05	28.55	16.48
Kasterlee	42.12	39.28	12.15	18.94	16.34	11.73	25.5	34.29	38.04	44.65	52.88	33.87	33.49	25.84	10.31	35.77	37.53	42.77	8.55	17.04	24.82	45.04	11.78	18.5	21.88	22.77	35.87	22.22	37.66	37.82		38.18	18.39	30.19	9.98	35.12	18.92	41.68	14.42	14.83	11.81	36.83	46.39	22.5	13.13	8.83	31.28	50.81	28.52
Kontich	4.21	10.22	49.08	43.36	50.6	35.1	14.83	4.37	14.04	6.87	14.72	7.65	17.96	27.67	48	5.94	2.73	37.37	38	21.14	20.62	7.69	27.33	21.55	31.69	36.94	2.98	24.84	28.12	20.21	38.18		39.54	8.61	28.92	3.51	26.13	12.02	44.05	38.48	47.16	3.89	8.22	15.88	28.83	42.82	15.64	12.82	10.45
Laakdal	43.73	44.95	27.75	37.25	15.23	28.91	24.72	37.06	32.7	44.38	53.34	38.69	43.02	39.7	19.4	34.82	40.17	57.28	9.84	22.69	19.45	47.22	16.39	18.84	9.16	39.75	38.37	15.09	50.3	47.68	18.39	39.54		31.04	22.3	36.03	32.11	37.43	7.85	32.74	14.83	40.01	47.1	25.25	12.62	26.96	26.28	50.18	33.22
Lier	12.82	15.25	41.55	37.79	42.04	28.71	6.32	6.31	12.19	14.53	23.12	9.37	18.61	24.8	39.75	5.84	9.19	38.09	29.46	13.27	12.65	16.23	18.96	12.97	23.52	32.7	7.42	16.63	29.91	22.36	30.19	8.61	31.04		21.49	5.17	21.08	13.41	35.45	32.55	38.68	9.21	16.63	7.7	20.24	35.63	9.69	20.69	6.52
Lille	32.69	29.32	20.17	18.76	25.53	8.84	17.98	24.83	31.08	35.6	43.49	24.05	23.69	17.61	20.29	27.29	28	35.15	14.35	8.37	19.67	35.44	7.3	12.26	21.57	18.14	26.41	18.76	28.89	28.13	9.98	28.92	22.3	21.49		26.09	10.07	34.05	21.58	13.28	21.19	27.22	37.06	13.96	11.2	14.15	24.83	41.7	18.87
Lint	7.7	12.2	46.25	41.39	47.21	32.75	11.33	3.63	12.14	9.49	17.98	7.77	18.25	26.7	44.81	3.61	4.88	37.95	34.62	18.09	17.16	11.2	24.06	18.13	28.21	35.49	3.54	21.35	28.65	21.19	35.12	3.51	36.03	5.17	26.09		24.27	11.35	40.6	36.33	43.83	5.45	11.48	12.67	25.4	40.14	12.54	15.69	8.46
Malle	29.09	23.14	25.99	17.24	35.13	10.13	20.52	21.76	32.8	32.97	39.55	19.4	15.26	7.6	28.88	26.66	24.37	25.18	24.41	12.21	24.91	31.08	16.05	17.96	30.01	11.76	23.21	25.59	18.9	19.22	18.92	26.13	32.11	21.08	10.07	24.27		34.48	31.63	12.58	30.66	23.3	33.56	15.63	20.14	19.13	27.87	38.64	15.83
Mechelen	13.62	22.2	53.58	51.12	50.9	41.84	16.24	14.92	4.87	10.48	18.18	19.01	29.53	37.78	50.35	8.07	14.73	49.17	38.96	25.69	18.37	16.42	29.92	23.22	28.44	46.07	14.32	22.55	39.88	32.16	41.68	12.02	37.43	13.41	34.05	11.35	34.48		43.61	45.81	48.28	15.81	13.79	20.17	29.75	48.12	11.26	14.28	19.25
Meerhout	48.26	48.05	21.19	33	7.57	26.07	29.36	41.02	39.06	49.53	58.4	41.97	44.53	39.08	12.1	8.07	44.27	56.47	7.25	24.77	25.25	51.63	17.85	22.53	16.36	37.14	42.47	21.08	50.47	49.13	14.42	44.05	7.85	35.45	21.58	40.6	31.63	43.61		29.23	7.16	43.92	51.99	28.66	15.31	21.88	32.34	55.53	36.35
Merksplas	41.61	35.61	15.64	5.51	29.96	4.44	30.41	34.11	43.43	45.34	52.13	31.96	27	15.78	21.87	38.34	36.86	30.04	23.12	20.75	32.9	43.66	20.36	25.45	34.15	8.63	35.61	32	27.2	30.27	14.83	38.48	32.74	32.55	13.28	36.33	12.58	45.81	29.23		25.48	35.82	46.08	25.82	23.87	9.32	37.6	51.12	28.05
Mol	51.3	49.78	14.73	28.37	4.56	23.18	33.01	43.69	43.99	53.13	61.8	43.99	44.87	37.65	5.19	43.72	46.98	54.47	9.35	26.55	30.04	54.49	19.88	25.81	22.6	33.92	45.22	26.21	49.45	49.31	11.81	47.16	14.83	38.68	21.19	43.83	30.66	48.28	7.16	25.48		46.46	55.3	31.32	18.68	16.95	37.12	59.25	38.42
Mortsel	5.79	6.76	47.25	40.51	50.13	32.69	15.45	2.95	17.39	9.98	16.44	4.07	14.1	24.18	46.89	8.91	1.23	33.49	37.51	19.99	21.85	8.22	26.6	21.44	32.71	33.69	1.94	25.83	24.24	16.36	36.83	3.89	40.01	9.21	27.22	5.45	23.3	15.81	43.92	35.82	46.46		10.27	15.27	28.61	40.8	17.88	15.36	8.35
Niel	4.48	13.04	57.21	50.76	58.67	42.92	22.63	12.26	17.83	3.33	6.51	14.21	22.85	34	56.21	12.32	9.25	40.78	46.09	29.35	27.8	3.78	35.51	29.59	38.85	43.75	10.68	32.14	31.96	23.63	46.39	8.22	47.1	16.63	37.06	11.48	33.56	13.79	51.99	46.08	55.3	10.27		24.08	36.86	50.87	21.8	5.2	18.35
Nijlen	19.99	19.7	33.9	31.23	34.89	21.73	4.89	12.42	17.62	22.17	30.59	13.47	19.07	21.16	32.14	13.39	15.7	36.88	22.26	5.62	10.35	23.18	11.45	6.41	19.17	27.34	13.92	12.78	28.29	23.57	22.5	15.88	25.25	7.7	13.96	12.67	15.63	20.17	28.66	25.82	31.32	15.27	24.08		13.37	28.1	12.25	28.34	7.98
Olen	33.02	32.91	25.23	29.12	21.82	19.5	14.36	25.72	25.67	34.55	43.32	26.75	30.42	27.64	20.63	25.07	28.96	45.12	9.34	10.09	11.93	36.35	4.1	7.27	10.39	29.34	27.17	9.1	37.81	35.07	13.13	28.83	12.62	20.24	11.2	25.4	20.14	29.75	15.31	23.87	18.68	28.61	36.86	13.37		21.39	18.79	40.64	21.16
Oud-Turnhout	46.44	41.89	6.87	11.43	21.25	9.11	31.94	38.61	44.94	49.59	57.21	37.31	34.37	24.26	12.8	41.44	41.68	39.35	17.15	22.49	32.5	48.96	19.11	25.54	30.65	17.93	40.19	30.42	36.04	38.14	8.83	42.82	26.96	35.63	14.15	40.14	19.13	48.12	21.88	9.32	16.95	40.8	50.87	28.1	21.39		38.44	55.64	32.53
Putte	19.38	24.46	43.38	43.08	39.65	33.32	7.36	15.36	6.89	18.74	27.61	18.95	28.21	33.01	39.42	9.83	17.42	47.48	27.84	16.85	7.12	22.9	19.55	12.92	17.45	39.59	15.94	11.3	38.04	32.05	31.28	15.64	26.28	9.69	24.83	12.54	27.87	11.26	32.34	37.6	37.12	17.88	21.8	12.25	18.79	38.44		24.16	15.88
Puurs	9.58	18.09	61.87	55.87	62.43	47.86	26.28	17.09	18.97	6.16	4.05	19.35	28	39.2	60.44	15.59	14.27	45.56	49.95	33.78	30.73	8.62	39.64	33.44	41.58	48.94	15.55	35.1	36.89	28.55	50.81	12.82	50.18	20.69	41.7	15.69	38.64	14.28	55.53	51.12	59.25	15.36	5.2	28.34	40.64	55.64	24.16		23.21
Ranst	13.91	11.76	38.93	33.01	42.24	24.66	10.32	6.12	18.64	17.31	24.69	5.62	12.38	18.54	38.63	11.2	9.16	31.64	29.67	11.87	17.07	16.57	18.68	14.38	26.94	27.05	7.68	20.3	22.52	16.48	28.52	10.45	33.22	6.52	18.87	8.46	15.83	19.25	36.35	28.05	38.42	8.35	18.35	7.98	21.16	32.53	15.88	23.21
Ravels	49.79	44.32	8.41	7.8	25.89	11.34	36.67	42.22	49.77	53.27	60.45	40.31	35.92	24.69	17.18	45.62	45.01	37.78	23.04	27	37.83	52.05	24.48	30.66	36.52	16.37	43.65	36	35.87	39.22	14.74	46.42	32.82	39.78	18.69	43.99	21.18	52.67	13.38	8.96	21.9	44.04	54.26	32.5	27.06	5.92	43.45	59.19	35.98
Retie	50.65	47.55	6.24	20.29	12.51	16.99	33.88	42.81	46.15	53.19	61.42	42.29	41.17	32.24	3.83	44.26	46.05	48.11	12.97	25.59	32.58	53.55	20.08	26.75	27.68	26.87	44.4	29.48	44.16	45.3	8.54	46.72	21.64	38.72	18.25	43.66	26.09	49.97	14.95	18.24	8.63	45.33	54.93	31.03	20.65	9.05	39.31	59.35	37
Rijkevorsel	35.25	28.63	22.57	11.13	34.81	7.17	26.58	28.07	39.11	39.25	45.53	25.48	19.71	8.49	27.45	33.08	30.57	24.22	25.78	17.6	30.39	37.04	19.71	23.11	34.03	5.82	29.49	30.48	20.19	22.91	18.6	32.44	34.59	27.49	12.56	30.67	6.43	40.9	32.65	7.36	30.25	29.46	39.69	21.72	23.72	15.84	33.95	44.82	22.22
Rumst	6.35	15.44	53.27	48.63	53.09	40	16.97	9.95	10.92	3.73	12.59	13.54	23.81	33.46	51.34	6.26	8.5	43.09	40.66	25	21.39	9.14	30.52	24.18	32.32	42.55	8.79	25.76	33.88	25.84	41.9	5.89	40.83	11.74	33.17	7.26	31.47	7.31	46.16	43.59	49.98	9.72	6.96	19.43	31.33	47.27	15.04	9.38	15.65
Schelle	3.31	11.29	56.09	49.32	58.03	41.62	22.17	11.16	18.43	4.31	7.53	12.75	21.14	32.39	55.33	12.2	8	39.03	45.42	28.42	27.61	2.08	34.73	28.97	38.7	42.19	9.57	31.92	30.2	21.87	45.53	7.42	46.78	16.01	35.98	10.86	32.15	14.68	51.45	44.7	54.57	8.92	1.76	23.27	36.24	49.68	21.91	6.86	17.16
Schilde	18.14	12.75	35.91	28.16	41.68	20.67	14.69	11.07	24.42	22.16	28.58	8.42	8.46	12.73	36.97	16.99	13.46	26.44	29.49	12.01	21.01	20.13	18.78	16.44	29.64	21.56	12.42	23.5	17.61	13.09	26.67	15.39	34.66	12.24	16.69	14.04	10.98	25.05	36.57	23.54	37.54	12.35	22.6	10.76	22.09	29.21	21.15	27.71	5.83
Schoten	15.44	7.8	41.1	31.94	47.44	25.47	18.51	10.36	25.75	20.01	24.99	6.33	4.37	14.39	42.61	17.46	11.39	24.07	35.24	17.63	25.21	16.55	24.48	21.61	34.64	24.3	11.13	28.2	14.79	8.26	32.31	13.94	40.16	14.28	22.34	13.95	15.39	25.28	42.3	27.82	43.28	10.16	19.63	15.48	27.66	34.31	23.93	24.84	8.22
Sint-Katelijne-Waver	12.75	19.32	47.62	45.09	45.78	35.77	10.31	10.73	5	11.73	20.61	14.83	25.12	32.32	44.72	3.65	11.78	44.82	33.57	19.63	13.56	16.19	24.1	17.45	24.35	40.26	10.71	17.92	35.54	28.31	35.81	9.49	33	7.58	27.99	7.2	28.6	6.07	38.65	39.76	42.92	12.56	14.83	14.1	24.26	42.09	7.01	17.22	13.83
Stabroek	22.02	12.65	49.46	37.07	58.51	33.51	31.1	20.92	36.51	26.63	27.57	17.01	9.52	18.66	52.72	27.98	20.15	16.58	46.81	29.84	37.84	20.92	36.45	34.22	47.33	28.06	20.91	40.91	9.3	4.89	42.61	22.83	52.52	26.26	32.98	24.39	23.88	34.84	54.02	34.43	54.15	19.16	24.7	28.18	39.92	42.6	35.93	29.24	20.78
Turnhout	44.14	39.35	9.6	9.87	23.25	6.38	30.28	36.36	43.36	47.42	54.89	34.89	31.67	21.51	15.05	39.47	39.37	36.75	17.73	20.68	31.35	46.59	18.01	24.18	30.44	15.45	37.92	29.59	33.3	35.41	9.17	40.61	27.56	33.64	12.32	38.02	16.46	46.36	23.13	6.82	18.82	38.46	48.59	26.24	20.72	2.75	37	53.42	30.25
Vorselaar	27.95	25.79	25.4	24.02	27.97	14.15	12.35	20.13	25.45	30.52	38.71	20.02	21.89	18.91	24.15	21.89	23.39	36.28	15.64	2.9	14.46	30.92	5.07	7.03	18.44	22.02	21.71	14.28	28.92	26.53	14.18	24.01	21.42	16.17	5.63	20.98	11.58	28.46	22.71	18.51	24	22.74	32.22	8.5	8.91	19.67	19.24	36.67	14.51
Vosselaar	40.03	35.23	13.53	10.73	25	2.81	26.65	32.26	39.76	43.36	50.77	30.76	27.72	18.07	17.47	35.55	35.26	34.14	17.35	16.95	28.26	42.46	15.21	20.92	28.58	13.59	33.83	26.92	29.97	31.58	9.21	36.53	26.93	29.71	8.73	34	12.47	42.59	23.62	5.81	20.44	34.34	44.49	22.43	18.43	6.69	33.56	49.34	26.15
Westerlo	37.22	38.5	28.33	35.01	19.78	25.81	18.2	30.54	26.82	37.97	46.92	32.24	37.01	34.74	21.53	28.39	33.64	52.21	9.81	16.76	13.18	40.7	11.18	12.44	4.91	36.1	31.84	8.89	44.79	41.65	17.13	33.02	6.53	24.51	18.03	29.52	27.23	31.43	12.28	30.01	18	33.49	40.64	18.83	7.1	25.94	20.19	43.84	26.81
Wijnegem	13.91	8.09	40.62	32.58	45.86	25.37	15.65	7.82	22.91	18.23	24.08	4.19	7.29	15.94	41.48	14.73	9.45	26.92	33.49	15.66	22.38	15.59	22.58	19.17	32.04	25.48	8.83	25.5	17.67	11.18	31.2	11.77	37.89	11.32	21.24	11.32	15.53	22.66	40.43	28.11	41.83	8.25	18.3	12.89	25.52	33.93	20.96	23.47	5.32
Willebroek	8.4	17.99	58.2	53.3	57.81	44.81	21.77	14.36	13.73	3.65	9.11	17.49	27.25	37.6	56.22	11.11	12.23	45.94	45.44	29.92	25.77	9.51	35.4	29	36.51	46.95	13	30.13	36.91	28.66	46.82	10.02	45.21	16.66	38.08	12.08	36.09	9.07	50.78	48.33	54.78	13.45	5.91	24.35	36.1	52.18	19.06	5.24	20.3
Wommelgem	12.28	8.47	41.15	34.03	45.33	26.3	13.53	5.43	20.3	16.31	22.82	2.73	9.87	18.09	41.4	12.15	7.58	29.52	32.81	14.93	20.31	14.43	21.83	17.77	30.33	27.34	6.63	23.65	20.27	13.58	31.19	9.62	36.6	8.8	21.35	8.8	16.81	20.12	39.59	29.34	41.42	6.49	16.75	11.37	24.46	34.58	18.48	21.84	3.4
Wuustwezel	32.16	23.34	34.72	20.64	47.09	19.64	30.84	26.84	41.23	36.79	40.93	23.05	13.33	5.53	39.91	33.52	28.2	12.16	37.21	24.46	36.42	32.79	29.09	30.16	42.81	11.47	27.82	37.85	8.36	14.12	30.77	30.7	45.19	29.06	23	30.27	13.08	41.56	44.33	19.09	42.53	26.97	36.17	26.22	33.17	28.16	37.76	41.32	22.59
Zandhoven	21.16	17.99	31.66	26.53	35.82	17.67	10.82	13.33	22.82	24.38	31.96	12.44	14.55	15.14	31.64	17.01	16.43	31.16	23.47	5.83	16.19	23.82	12.64	10.59	23.81	21.73	14.91	18.02	22.86	19.2	21.43	17.56	28.49	11.26	11.64	15.09	9.98	24.64	30.48	25.82	31.8	15.6	25.59	6.02	15.91	25.29	18.07	30.38	7.27
Zoersel	27.18	22.2	26.42	19.66	33.73	11.27	17.18	19.57	29.66	30.79	37.84	17.73	15.59	10.49	28.14	23.89	22.41	27.92	22.37	8.8	21.47	29.46	13.16	14.56	26.83	15.05	21.09	22.22	20.95	19.95	17.9	23.92	29.46	18.18	8.2	21.76	3.44	31.57	29.62	14.58	29.36	21.42	31.66	12.3	17.2	19.7	24.54	36.63	13.48
Zwijndrecht	10.41	5.35	53.84	44.38	59.06	38.26	25.77	13.32	26.79	14.51	14.81	11.36	13.97	26.08	54.9	18.78	10.84	29.31	46.56	26.68	32.29	8.38	35.57	31.19	43.05	36.22	12.39	36.18	21.03	12.9	44.62	12.86	49.99	19.64	34.66	15.71	28.16	24.01	53.31	40.5	55.12	10.48	12.11	24.81	38.11	47.07	28.25	16.42	16.96
[truncated: 20 more columns]

## Sheet: Flow Lying Surfaces Matrix
Gemeente	Aartselaar	Antwerpen	Arendonk	Baarle-Hertog	Balen	Beerse	Berlaar	Boechout	Bonheiden	Boom	Bornem	Borsbeek	Brasschaat	Brecht	Dessel	Duffel	Edegem	Essen	Geel	Grobbendonk	Heist-op-den-Berg	Hemiksem	Herentals	Herenthout	Herselt	Hoogstraten	Hove (Antwerpen)	Hulshout	Kalmthout	Kapellen	Kasterlee	Kontich	Laakdal	Lier	Lille	Lint	Malle	Mechelen	Meerhout	Merksplas	Mol	Mortsel	Niel	Nijlen	Olen	Oud-Turnhout	Putte	Puurs	Ranst
Aartselaar		3.16897	0.00268349	0.000751611	0.00428072	0.00690775	0.0180994	0.121878	0.0304033	0.462952	0.103092	0.0644718	0.0600057	0.0187646	0.00199831	0.10907	0.550815	0.00765091	0.0128872	0.00997071	0.0395849	0.516347	0.0161049	0.00773645	0.00638078	0.00776593	0.118203	0.00702206	0.0130767	0.0370214	0.00599311	0.673603	0.00476621	0.12553	0.00872725	0.082074	0.010382	0.263812	0.0024961	0.00279234	0.00792102	0.439361	0.295913	0.0323214	0.00648694	0.00364773	0.0268797	0.160422	0.0558475
Antwerpen	3.16897		0.113991	0.0367834	0.160218	0.334163	0.53086	3.26799	0.525611	1.82711	1.3951	5.65013	7.7072	1.25248	0.079365	1.45922	7.79505	0.49741	0.484669	0.414948	1.12904	2.61731	0.625398	0.271037	0.200916	0.42651	2.24419	0.214221	1.0639	4.80782	0.248217	4.1173	0.162487	3.19542	0.390774	1.17764	0.591002	3.57674	0.0906977	0.13733	0.303006	11.61	1.25809	1.19875	0.235225	0.161485	0.607806	1.62056	2.81442
Arendonk	0.00268349	0.113991		0.00572802	0.0357216	0.0368183	0.00433475	0.0034311	0.00311787	0.0030934	0.00273737	0.00295139	0.0116581	0.0158562	0.0539557	0.00409721	0.00499168	0.00478927	0.0606616	0.00724124	0.016302	0.00195973	0.0258219	0.00507605	0.0068217	0.0192689	0.00198247	0.00461998	0.00536215	0.00690919	0.0663423	0.00456534	0.0109023	0.0110076	0.0211159	0.00209545	0.0119804	0.015702	0.0119258	0.0182055	0.0884961	0.00607699	0.00167144	0.0103521	0.0102346	0.153535	0.00494159	0.00354282	0.00656754
Baarle-Hertog	0.000751611	0.0367834	0.00572802		0.0023892	0.020578	0.00101172	0.000982629	0.000705777	0.00082199	0.00074309	0.00091479	0.00457267	0.00946009	0.00184629	0.00104102	0.00143674	0.00235285	0.00602233	0.00181423	0.00325622	0.000559748	0.00476682	0.00106243	0.00104992	0.0284283	0.00056524	0.000835113	0.00250737	0.0027171	0.00588021	0.00125983	0.00130318	0.0028661	0.00525733	0.000563534	0.00586434	0.00371527	0.00105909	0.0315925	0.00513832	0.00178065	0.000457299	0.00262721	0.00165476	0.0119464	0.00107921	0.000935754	0.00196739
Balen	0.00428072	0.160218	0.0357216	0.0023892		0.0209867	0.00793384	0.00531873	0.00622343	0.00519904	0.0044804	0.00425997	0.0140707	0.0147386	0.112481	0.00716531	0.00774202	0.00489473	0.227035	0.0107636	0.0361187	0.00307029	0.0453048	0.00959067	0.0225785	0.0128926	0.00309364	0.0115034	0.00576936	0.00834705	0.0629602	0.00737239	0.0621261	0.018456	0.0226228	0.00345192	0.0112552	0.0298644	0.160393	0.00851571	1.58499	0.00926668	0.0027279	0.0167747	0.0234869	0.0275442	0.0101528	0.00597242	0.00957527
Beerse	0.00690775	0.334163	0.0368183	0.020578	0.0209867		0.0119991	0.00998433	0.00691217	0.0074531	0.00626348	0.00921797	0.042247	0.088892	0.0165241	0.010475	0.013888	0.0137893	0.0753691	0.0290675	0.0374654	0.00495805	0.0788088	0.0145576	0.0115456	0.123525	0.00560645	0.0097541	0.0180484	0.0226528	0.0970772	0.0121741	0.0137	0.0314441	0.149929	0.00569965	0.107556	0.0351195	0.0107458	0.308093	0.0487386	0.0173154	0.00405028	0.0343621	0.0233673	0.119084	0.0114237	0.00807485	0.0223232
Berlaar	0.0180994	0.53086	0.00433475	0.00101172	0.00793384	0.0119991		0.0388542	0.0398885	0.0206524	0.0115148	0.0223712	0.0342764	0.0199514	0.00366614	0.0700348	0.0421268	0.00515236	0.0329616	0.0536685	0.426215	0.0104297	0.0675063	0.0790313	0.0221173	0.00937334	0.0199994	0.0438638	0.00818686	0.0164058	0.0132047	0.0438395	0.0120452	0.417127	0.0232974	0.0306131	0.0168498	0.14985	0.00544634	0.00422192	0.0154492	0.0498312	0.00936549	0.436192	0.027699	0.00622756	0.150507	0.0172157	0.0819367
Boechout	0.121878	3.26799	0.0034311	0.000982629	0.00531873	0.00998433	0.0388542		0.0318767	0.0767568	0.0319695	0.333426	0.0932002	0.0277848	0.00255918	0.176845	1.07301	0.00848772	0.0176503	0.0194143	0.0622938	0.0518972	0.0260011	0.0138452	0.00854562	0.0104878	1.70885	0.0104127	0.0157225	0.0455148	0.00838006	0.579373	0.00614999	0.480194	0.0140187	0.342237	0.0171951	0.203734	0.00320183	0.00385081	0.0101206	1.56851	0.0366178	0.0775934	0.00990843	0.00489059	0.0396555	0.0467159	0.267367
Bonheiden	0.0304033	0.525611	0.00311787	0.000705777	0.00622343	0.00691217	0.0398885	0.0318767		0.0518373	0.0242325	0.0164019	0.0248076	0.0126721	0.00263671	0.142512	0.0479817	0.00454311	0.0198542	0.0126127	0.129877	0.0172313	0.0241022	0.0139949	0.0152639	0.00634627	0.0200148	0.0190606	0.00675737	0.0143185	0.00767718	0.0632831	0.00890616	0.145067	0.0100879	0.0344988	0.0085325	2.15598	0.00398131	0.00267816	0.0112554	0.05089	0.0195196	0.0434667	0.0112149	0.00407001	0.222202	0.0427479	0.0324952
Boom	0.462952	1.82711	0.0030934	0.00082199	0.00519904	0.0074531	0.0206524	0.0767568	0.0518373		0.192557	0.0402178	0.0495179	0.0184449	0.00236045	0.138763	0.209005	0.00775097	0.0153152	0.0105952	0.0498363	0.213999	0.0182581	0.00883566	0.00813027	0.00813765	0.0629145	0.00880736	0.0123524	0.0312326	0.00685631	0.325206	0.00594925	0.125631	0.00946045	0.0694639	0.0103905	0.572835	0.00304653	0.00302346	0.00949381	0.190117	0.68855	0.0337822	0.00761732	0.00411267	0.0369571	0.498814	0.0463626
Bornem	0.103092	1.3951	0.00273737	0.00074309	0.0044804	0.00626348	0.0115148	0.0319695	0.0242325	0.192557		0.022433	0.0416691	0.0158603	0.00203522	0.042876	0.0769044	0.00820933	0.0122622	0.00724501	0.0310781	0.134363	0.0133433	0.00583844	0.00600075	0.00734006	0.0236495	0.00594998	0.0122806	0.0296521	0.00562728	0.0815463	0.00474109	0.0571213	0.00729761	0.0222771	0.00831245	0.219135	0.00252269	0.00263293	0.00807776	0.0806541	0.207401	0.0204272	0.00557788	0.00355726	0.0195998	1.32843	0.0262342
Borsbeek	0.0644718	5.65013	0.00295139	0.00091479	0.00425997	0.00921797	0.0223712	0.333426	0.0164019	0.0402178	0.022433		0.147341	0.0310958	0.002115	0.0585039	0.343795	0.00898328	0.0139678	0.0156821	0.0391687	0.0360358	0.0204784	0.00986118	0.00604244	0.0104097	0.153565	0.00700938	0.018486	0.0633776	0.00703441	0.154837	0.00462129	0.178349	0.0122379	0.0611749	0.0177172	0.102781	0.00250488	0.00359234	0.00817592	0.674866	0.0223234	0.0540267	0.00750196	0.00428929	0.0213375	0.0298443	0.259665
Brasschaat	0.0600057	7.7072	0.0116581	0.00457267	0.0140707	0.042247	0.0342764	0.0932002	0.0248076	0.0495179	0.0416691	0.147341		0.299622	0.00749797	0.055505	0.141468	0.0735687	0.0435254	0.04029	0.0756267	0.0457815	0.0581544	0.0219195	0.0149331	0.064482	0.0528972	0.0153923	0.258855	1.85393	0.025115	0.0980593	0.0130474	0.15782	0.0440261	0.0387075	0.0999527	0.148681	0.00776721	0.0175699	0.0274307	0.196279	0.0301357	0.0940908	0.0202492	0.0176434	0.0336093	0.0497523	0.186788
Brecht	0.0187646	1.25248	0.0158562	0.00946009	0.0147386	0.088892	0.0199514	0.0277848	0.0126721	0.0184449	0.0158603	0.0310958	0.299622		0.00883194	0.0229893	0.039685	0.0712533	0.0459501	0.0355021	0.0507256	0.0139725	0.0584942	0.0170945	0.0119922	0.239221	0.0155978	0.0114325	0.152703	0.144139	0.0325053	0.0318317	0.0118049	0.0684744	0.0613901	0.013934	0.310494	0.0699897	0.0077703	0.0396332	0.030019	0.0514251	0.0104875	0.0588835	0.0188985	0.0272857	0.0189126	0.0195584	0.0641724
Dessel	0.00199831	0.079365	0.0539557	0.00184629	0.112481	0.0165241	0.00366614	0.00255918	0.00263671	0.00236045	0.00203522	0.002115	0.00749797	0.00883194		0.00325476	0.00369367	0.00270078	0.107339	0.00577622	0.0152667	0.00143773	0.0244519	0.00458607	0.00784206	0.00863549	0.00147838	0.00466249	0.00316583	0.00439687	0.0665983	0.00345014	0.0161243	0.00869359	0.0150832	0.00161357	0.00701338	0.0128529	0.0264373	0.00673003	0.515267	0.00446035	0.00125154	0.00832482	0.0110649	0.0319697	0.00432564	0.00268348	0.00482125
Duffel	0.10907	1.45922	0.00409721	0.00104102	0.00716531	0.010475	0.0700348	0.176845	0.142512	0.138763	0.042876	0.0585039	0.055505	0.0229893	0.00325476		0.232143	0.00766885	0.0236993	0.0213155	0.123589	0.0467581	0.0330068	0.0195575	0.0142252	0.0101467	0.113861	0.0183801	0.0125431	0.0302498	0.0101738	0.414275	0.00920383	0.740611	0.0153318	0.457158	0.0151336	0.920015	0.109291	0.00402673	0.0133521	0.227152	0.0479063	0.0881958	0.0137778	0.0056087	0.127914	0.0741647	0.105467
Edegem	0.550815	7.79505	0.00499168	0.00143674	0.00774202	0.013888	0.0421268	1.07301	0.0479817	0.209005	0.0769044	0.343795	0.141468	0.039685	0.00369367	0.232143		0.0138596	0.0245205	0.0228694	0.078946	0.178023	0.0334108	0.0167263	0.0118041	0.0152944	2.19489	0.0136661	0.0253725	0.0766258	0.0116438	2.47096	0.00871268	0.376803	0.0183491	0.315189	0.0228182	0.347909	0.00457553	0.00548877	0.0145684	15.0173	0.107068	0.0808238	0.0130083	0.00698514	0.0513168	0.111525	0.198651
Essen	0.00765091	0.49741	0.00478927	0.00235285	0.00489473	0.0137893	0.00515236	0.00848772	0.00454311	0.00775097	0.00820933	0.00898328	0.0735687	0.0712533	0.00270078	0.00766885	0.0138596		0.012478	0.00644934	0.0143981	0.00632964	0.0125249	0.00394709	0.00365561	0.0344496	0.00509629	0.00324268	0.163521	0.0674144	0.00771728	0.011351	0.00368842	0.0188805	0.0100224	0.00448618	0.0183981	0.0268758	0.00242056	0.00711339	0.00932856	0.0174366	0.00474175	0.012608	0.00461285	0.00674577	0.005946	0.00941763	0.0143317
Geel	0.0128872	0.484669	0.0606616	0.00602233	0.227035	0.0753691	0.0329616	0.0176503	0.0198542	0.0153152	0.0122622	0.0139678	0.0435254	0.0459501	0.107339	0.0236993	0.0245205	0.012478		0.0554222	0.157782	0.00894307	0.371592	0.0531856	0.10655	0.0363507	0.0100403	0.0565291	0.0160347	0.024368	0.410049	0.0233099	0.265388	0.0670186	0.127686	0.0114465	0.0415694	0.0908969	0.311817	0.0254992	0.672251	0.0295137	0.00788216	0.0734859	0.22858	0.0754081	0.0367226	0.0166366	0.0346068
Grobbendonk	0.00997071	0.414948	0.00724124	0.00181423	0.0107636	0.0290675	0.0536685	0.0194143	0.0126127	0.0105952	0.00724501	0.0156821	0.04029	0.0355021	0.00577622	0.0213155	0.0228694	0.00644934	0.0554222		0.114328	0.00640396	0.256686	0.119314	0.0184631	0.0170404	0.0101058	0.0252443	0.0103868	0.0188428	0.0283554	0.0206873	0.0137091	0.0907249	0.103087	0.0115148	0.0456336	0.0574204	0.00733721	0.00869507	0.0228999	0.0285429	0.00533887	0.316657	0.0537969	0.0120441	0.0275346	0.00999131	0.0593885
Heist-op-den-Berg	0.0395849	1.12904	0.016302	0.00325622	0.0361187	0.0374654	0.426215	0.0622938	0.129877	0.0498363	0.0310781	0.0391687	0.0756267	0.0507256	0.0152667	0.123589	0.078946	0.0143981	0.157782	0.114328		0.024378	0.263949	0.275164	0.19832	0.0273751	0.0346624	0.919402	0.0212275	0.0404098	0.0513846	0.0835984	0.0717299	0.383838	0.0717639	0.0491994	0.0421531	0.431754	0.027147	0.0132978	0.0687738	0.0918507	0.022879	0.358956	0.147952	0.0221742	0.592897	0.046417	0.110407
Hemiksem	0.516347	2.61731	0.00195973	0.000559748	0.00307029	0.00495805	0.0104297	0.0518972	0.0172313	0.213999	0.134363	0.0360358	0.0457815	0.0139725	0.00143773	0.0467581	0.178023	0.00632964	0.00894307	0.00640396	0.024378		0.0107039	0.00488238	0.00425376	0.00582143	0.0436928	0.00449418	0.0106967	0.0307516	0.00422139	0.162607	0.00329233	0.0630823	0.00598057	0.0312445	0.00732539	0.146192	0.00175653	0.00204276	0.00565464	0.175573	0.33478	0.0193603	0.00431129	0.00264331	0.0155054	0.159589	0.0316983
Herentals	0.0161049	0.625398	0.0258219	0.00476682	0.0453048	0.0788088	0.0675063	0.0260011	0.0241022	0.0182581	0.0133433	0.0204784	0.0581544	0.0584942	0.0244519	0.0330068	0.0334108	0.0125249	0.371592	0.256686	0.263949	0.0107039		0.223231	0.078137	0.0366509	0.0142132	0.0842657	0.0181002	0.0298734	0.150121	0.0313178	0.0664779	0.112447	0.342898	0.0164702	0.0668225	0.107109	0.035749	0.0228513	0.103344	0.0407866	0.0092283	0.193022	0.824383	0.0422075	0.0517538	0.0183582	0.0606746
Herenthout	0.00773645	0.271037	0.00507605	0.00106243	0.00959067	0.0145576	0.0790313	0.0138452	0.0139949	0.00883566	0.00583844	0.00986118	0.0219195	0.0170945	0.00458607	0.0195575	0.0167263	0.00394709	0.0531856	0.119314	0.275164	0.00488238	0.223231		0.0294983	0.00908961	0.00739499	0.0629631	0.00600117	0.0110246	0.0196139	0.0162312	0.0162124	0.0774318	0.0391745	0.00934692	0.0171963	0.0573061	0.00723089	0.00471264	0.0197568	0.0202305	0.00428259	0.198461	0.0844894	0.00761452	0.0381843	0.00831266	0.0329926
Herselt	0.00638078	0.200916	0.0068217	0.00104992	0.0225785	0.0115456	0.0221173	0.00854562	0.0152639	0.00813027	0.00600075	0.00604244	0.0149331	0.0119922	0.00784206	0.0142252	0.0118041	0.00365561	0.10655	0.0184631	0.19832	0.00425376	0.078137	0.0294983		0.00769881	0.00490464	0.125402	0.0049244	0.00840447	0.022354	0.0119659	0.109336	0.0375377	0.0201757	0.00615462	0.00981881	0.0608989	0.0218621	0.00417256	0.041079	0.013856	0.00396058	0.0353746	0.0659452	0.00842883	0.0333705	0.00857131	0.0149859
Hoogstraten	0.00776593	0.42651	0.0192689	0.0284283	0.0128926	0.123525	0.00937334	0.0104878	0.00634627	0.00813765	0.00734006	0.0104097	0.064482	0.239221	0.00863549	0.0101467	0.0152944	0.0344496	0.0363507	0.0170404	0.0273751	0.00582143	0.0366509	0.00908961	0.00769881		0.00599455	0.006641	0.0400455	0.0374526	0.0304123	0.0129754	0.00855469	0.0286136	0.0420319	0.00572956	0.094211	0.0341946	0.00625028	0.0962692	0.0268689	0.0192452	0.00460161	0.025625	0.0121848	0.0362905	0.00955229	0.00911619	0.0219013
Hove (Antwerpen)	0.118203	2.24419	0.00198247	0.00056524	0.00309364	0.00560645	0.0199994	1.70885	0.0200148	0.0629145	0.0236495	0.153565	0.0528972	0.0155978	0.00147838	0.113861	2.19489	0.00509629	0.0100403	0.0101058	0.0346624	0.0436928	0.0142132	0.00739499	0.00490464	0.00599455		0.00585003	0.00932732	0.0272724	0.00474126	0.77137	0.00355202	0.215001	0.00767181	0.222796	0.00935722	0.136927	0.00184927	0.00218749	0.005849	2.24544	0.0298748	0.038244	0.0054972	0.00279446	0.0227973	0.0349351	0.105114
Hulshout	0.00702206	0.214221	0.00461998	0.000835113	0.0115034	0.0097541	0.0438638	0.0104127	0.0190606	0.00880736	0.00594998	0.00700938	0.0153923	0.0114325	0.00466249	0.0183801	0.0136661	0.00324268	0.0565291	0.0252443	0.919402	0.00449418	0.0842657	0.0629631	0.125402	0.006641	0.00585003		0.00462101	0.00834766	0.0156309	0.0140445	0.0290533	0.0541477	0.0192346	0.00774878	0.00973804	0.069855	0.00949594	0.00342693	0.0220254	0.016024	0.00417321	0.0573979	0.0619945	0.00617066	0.0573876	0.00867408	0.019033
Kalmthout	0.0130767	1.0639	0.00536215	0.00250737	0.00576936	0.0180484	0.00818686	0.0157225	0.00675737	0.0123524	0.0122806	0.018486	0.258855	0.152703	0.00316583	0.0125431	0.0253725	0.163521	0.0160347	0.0103868	0.0212275	0.0106967	0.0181002	0.00600117	0.0049244	0.0400455	0.00932732	0.00462101		0.285806	0.0098071	0.0197519	0.00471268	0.030169	0.0146179	0.0077555	0.032175	0.0402541	0.00298567	0.00854864	0.0111521	0.0327933	0.00760638	0.0211116	0.00647221	0.00792337	0.0091269	0.0141531	0.0278736
Kapellen	0.0370214	4.80782	0.00690919	0.0027171	0.00834705	0.0226528	0.0164058	0.0455148	0.0143185	0.0312326	0.0296521	0.0633776	1.85393	0.144139	0.00439687	0.0302498	0.0766258	0.0674144	0.024368	0.0188428	0.0404098	0.0307516	0.0298734	0.0110246	0.00840447	0.0374526	0.0272724	0.00834766	0.285806		0.0139027	0.0546698	0.00749846	0.0771775	0.0220435	0.0202692	0.0444811	0.0884969	0.00450459	0.00986848	0.0160346	0.102926	0.0198932	0.0434819	0.0107556	0.0101148	0.0183818	0.0337828	0.0744141
Kasterlee	0.00599311	0.248217	0.0663423	0.00588021	0.0629602	0.0970772	0.0132047	0.00838006	0.00767718	0.00685631	0.00562728	0.00703441	0.025115	0.0325053	0.0665983	0.0101738	0.0116438	0.00771728	0.410049	0.0283554	0.0513846	0.00422139	0.150121	0.0196139	0.022354	0.0304123	0.00474126	0.0156309	0.0098071	0.0139027		0.0107178	0.0352678	0.0296214	0.122534	0.00516283	0.0321172	0.036864	0.0365861	0.0287667	0.195581	0.0142097	0.00361145	0.0333857	0.0536876	0.132037	0.0135023	0.00746289	0.0173848
Kontich	0.673603	4.1173	0.00456534	0.00125983	0.00737239	0.0121741	0.0438395	0.579373	0.0632831	0.325206	0.0815463	0.154837	0.0980593	0.0318317	0.00345014	0.414275	2.47096	0.011351	0.0233099	0.0206873	0.0835984	0.162607	0.0313178	0.0162312	0.0119659	0.0129754	0.77137	0.0140445	0.0197519	0.0546698	0.0107178		0.00856659	0.408945	0.0163855	0.580392	0.0189078	0.497723	0.00440245	0.0047978	0.0137726	1.4303	0.129159	0.0752598	0.0125041	0.00630468	0.0606468	0.131634	0.145403
Laakdal	0.00476621	0.162487	0.0109023	0.00130318	0.0621261	0.0137	0.0120452	0.00614999	0.00890616	0.00594925	0.00474109	0.00462129	0.0130474	0.0118049	0.0161243	0.00920383	0.00871268	0.00368842	0.265388	0.0137091	0.0717299	0.00329233	0.0664779	0.0162124	0.109336	0.00855469	0.00355202	0.0290533	0.00471268	0.00749846	0.0352678	0.00856659		0.024021	0.0210383	0.00420505	0.00955878	0.0391851	0.105831	0.00505963	0.106328	0.0103218	0.00300325	0.0227251	0.0498182	0.0121417	0.0163981	0.00655915	0.0109843
Lier	0.12553	3.19542	0.0110076	0.0028661	0.018456	0.0314441	0.417127	0.480194	0.145067	0.125631	0.0571213	0.178349	0.15782	0.0684744	0.00869359	0.740611	0.376803	0.0188805	0.0670186	0.0907249	0.383838	0.0630823	0.112447	0.0774318	0.0375377	0.0286136	0.215001	0.0541477	0.030169	0.0771775	0.0296214	0.408945	0.024021		0.0512787	0.462284	0.0502032	0.691024	0.0117465	0.0115868	0.035379	0.440922	0.0545303	0.553142	0.0438405	0.0157354	0.273016	0.0873328	0.645454
Lille	0.00872725	0.390774	0.0211159	0.00525733	0.0226228	0.149929	0.0232974	0.0140187	0.0100879	0.00946045	0.00729761	0.0122379	0.0440261	0.0613901	0.0150832	0.0153318	0.0183491	0.0100224	0.127686	0.103087	0.0717639	0.00598057	0.342898	0.0391745	0.0201757	0.0420319	0.00767181	0.0192346	0.0146179	0.0220435	0.122534	0.0163855	0.0210383	0.0512787		0.00820592	0.0994487	0.0484509	0.0143292	0.031467	0.0532896	0.0228187	0.0049636	0.0760733	0.0647211	0.0451006	0.0187961	0.00971877	0.0348339
Lint	0.082074	1.17764	0.00209545	0.000563534	0.00345192	0.00569965	0.0306131	0.342237	0.0344988	0.0694639	0.0222771	0.0611749	0.0387075	0.013934	0.00161357	0.457158	0.315189	0.00448618	0.0114465	0.0115148	0.0491994	0.0312445	0.0164702	0.00934692	0.00615462	0.00572956	0.222796	0.00774878	0.0077555	0.0202692	0.00516283	0.580392	0.00420505	0.462284	0.00820592		0.00893302	0.227522	0.00211229	0.00219381	0.00649891	0.296998	0.0269901	0.048187	0.0065659	0.00292429	0.0384508	0.0358193	0.0904242
Malle	0.010382	0.591002	0.0119804	0.00586434	0.0112552	0.107556	0.0168498	0.0171951	0.0085325	0.0103905	0.00831245	0.0177172	0.0999527	0.310494	0.00701338	0.0151336	0.0228182	0.0183981	0.0415694	0.0456336	0.0421531	0.00732539	0.0668225	0.0171963	0.00981881	0.094211	0.00935722	0.00973804	0.032175	0.0444811	0.0321172	0.0189078	0.00955878	0.0502032	0.0994487	0.00893302		0.0445107	0.00628333	0.0330333	0.0239785	0.0293371	0.00570199	0.0571673	0.018855	0.0232449	0.0140543	0.0106628	0.046628
Mechelen	0.263812	3.57674	0.015702	0.00371527	0.0298644	0.0351195	0.14985	0.203734	2.15598	0.572835	0.219135	0.102781	0.148681	0.0699897	0.0128529	0.920015	0.347909	0.0268758	0.0908969	0.0574204	0.431754	0.146192	0.107109	0.0573061	0.0608989	0.0341946	0.136927	0.069855	0.0402541	0.0884969	0.036864	0.497723	0.0391851	0.691024	0.0484509	0.227522	0.0445107		0.0184117	0.0138762	0.0538654	0.35493	0.188114	0.19122	0.0481336	0.0204637	0.479606	0.434878	0.175641
Meerhout	0.0024961	0.0906977	0.0119258	0.00105909	0.160393	0.0107458	0.00544634	0.00320183	0.00398131	0.00304653	0.00252269	0.00250488	0.00776721	0.0077703	0.0264373	0.109291	0.00457553	0.00242056	0.311817	0.00733721	0.027147	0.00175653	0.035749	0.00723089	0.0218621	0.00625028	0.00184927	0.00949594	0.00298567	0.00450459	0.0365861	0.00440245	0.105831	0.0117465	0.0143292	0.00211229	0.00628333	0.0184117		0.00404877	0.290943	0.00546351	0.00157217	0.0112507	0.0215904	0.0117579	0.0069067	0.00341632	0.00585149
Merksplas	0.00279234	0.13733	0.0182055	0.0315925	0.00851571	0.308093	0.00422192	0.00385081	0.00267816	0.00302346	0.00263293	0.00359234	0.0175699	0.0396332	0.00673003	0.00402673	0.00548877	0.00711339	0.0254992	0.00869507	0.0132978	0.00204276	0.0228513	0.00471264	0.00417256	0.0962692	0.00218749	0.00342693	0.00854864	0.00986848	0.0287667	0.0047978	0.00505963	0.0115868	0.031467	0.00219381	0.0330333	0.0138762	0.00404877		0.0191056	0.00683079	0.00166433	0.0115278	0.0073864	0.0538914	0.00424913	0.00335241	0.00817214
Mol	0.00792102	0.303006	0.0884961	0.00513832	1.58499	0.0487386	0.0154492	0.0101206	0.0112554	0.00949381	0.00807776	0.00817592	0.0274307	0.030019	0.515267	0.0133521	0.0145684	0.00932856	0.672251	0.0228999	0.0687738	0.00565464	0.103344	0.0197568	0.041079	0.0268689	0.005849	0.0220254	0.0111521	0.0160346	0.195581	0.0137726	0.106328	0.035379	0.0532896	0.00649891	0.0239785	0.0538654	0.290943	0.0191056		0.0175072	0.00498272	0.0337807	0.052004	0.070253	0.0187981	0.0107601	0.0187819
Mortsel	0.439361	11.61	0.00607699	0.00178065	0.00926668	0.0173154	0.0498312	1.56851	0.05089	0.190117	0.0806541	0.674866	0.196279	0.0514251	0.00446035	0.227152	15.0173	0.0174366	0.0295137	0.0285429	0.0918507	0.175573	0.0407866	0.0202305	0.013856	0.0192452	2.24544	0.016024	0.0327933	0.102926	0.0142097	1.4303	0.0103218	0.440922	0.0228187	0.296998	0.0293371	0.35493	0.00546351	0.00683079	0.0175072		0.102079	0.100414	0.0156645	0.00856734	0.0572475	0.113128	0.28096
Niel	0.295913	1.25809	0.00167144	0.000457299	0.0027279	0.00405028	0.00936549	0.0366178	0.0195196	0.68855	0.207401	0.0223234	0.0301357	0.0104875	0.00125154	0.0479063	0.107068	0.00474175	0.00788216	0.00533887	0.022879	0.33478	0.0092283	0.00428259	0.00396058	0.00460161	0.0298748	0.00417321	0.00760638	0.0198932	0.00361145	0.129159	0.00300325	0.0545303	0.0049636	0.0269901	0.00570199	0.188114	0.00157217	0.00166433	0.00498272	0.102079		0.0162818	0.00380525	0.00222221	0.0155282	0.398006	0.0234577
Nijlen	0.0323214	1.19875	0.0103521	0.00262721	0.0167747	0.0343621	0.436192	0.0775934	0.0434667	0.0337822	0.0204272	0.0540267	0.0940908	0.0588835	0.00832482	0.0881958	0.0808238	0.012608	0.0734859	0.316657	0.358956	0.0193603	0.193022	0.198461	0.0353746	0.025625	0.038244	0.0573979	0.0211116	0.0434819	0.0333857	0.0752598	0.0227251	0.553142	0.0760733	0.048187	0.0571673	0.19122	0.0112507	0.0115278	0.0337807	0.100414	0.0162818		0.0628966	0.0158377	0.106944	0.0291401	0.269742
Olen	0.00648694	0.235225	0.0102346	0.00165476	0.0234869	0.0233673	0.027699	0.00990843	0.0112149	0.00761732	0.00557788	0.00750196	0.0202492	0.0188985	0.0110649	0.0137778	0.0130083	0.00461285	0.22858	0.0537969	0.147952	0.00431129	0.824383	0.0844894	0.0659452	0.0121848	0.0054972	0.0619945	0.00647221	0.0107556	0.0536876	0.0125041	0.0498182	0.0438405	0.0647211	0.0065659	0.018855	0.0481336	0.0215904	0.0073864	0.052004	0.0156645	0.00380525	0.0628966		0.0149679	0.0248916	0.00776002	0.0210088
Oud-Turnhout	0.00364773	0.161485	0.153535	0.0119464	0.0275442	0.119084	0.00622756	0.00489059	0.00407001	0.00411267	0.00355726	0.00428929	0.0176434	0.0272857	0.0319697	0.0056087	0.00698514	0.00674577	0.0754081	0.0120441	0.0221742	0.00264331	0.0422075	0.00761452	0.00842883	0.0362905	0.00279446	0.00617066	0.00792337	0.0101148	0.132037	0.00630468	0.0121417	0.0157354	0.0451006	0.00292429	0.0232449	0.0204637	0.0117579	0.0538914	0.070253	0.00856734	0.00222221	0.0158377	0.0149679		0.00661537	0.00460479	0.0098873
Putte	0.0268797	0.607806	0.00494159	0.00107921	0.0101528	0.0114237	0.150507	0.0396555	0.222202	0.0369571	0.0195998	0.0213375	0.0336093	0.0189126	0.00432564	0.127914	0.0513168	0.005946	0.0367226	0.0275346	0.592897	0.0155054	0.0517538	0.0381843	0.0333705	0.00955229	0.0227973	0.0573876	0.0091269	0.0183818	0.0135023	0.0606468	0.0163981	0.273016	0.0187961	0.0384508	0.0140543	0.479606	0.0069067	0.00424913	0.0187981	0.0572475	0.0155282	0.106944	0.0248916	0.00661537		0.0313411	0.0532439
Puurs	0.160422	1.62056	0.00354282	0.000935754	0.00597242	0.00807485	0.0172157	0.0467159	0.0427479	0.498814	1.32843	0.0298443	0.0497523	0.0195584	0.00268348	0.0741647	0.111525	0.00941763	0.0166366	0.00999131	0.046417	0.159589	0.0183582	0.00831266	0.00857131	0.00911619	0.0349351	0.00867408	0.0141531	0.0337828	0.00746289	0.131634	0.00655915	0.0873328	0.00971877	0.0358193	0.0106628	0.434878	0.00341632	0.00335241	0.0107601	0.113128	0.398006	0.0291401	0.00776002	0.00460479	0.0313411		0.0363483
Ranst	0.0558475	2.81442	0.00656754	0.00196739	0.00957527	0.0223232	0.0819367	0.267367	0.0324952	0.0463626	0.0262342	0.259665	0.186788	0.0641724	0.00482125	0.105467	0.198651	0.0143317	0.0346068	0.0593885	0.110407	0.0316983	0.0606746	0.0329926	0.0149859	0.0219013	0.105114	0.019033	0.0278736	0.0744141	0.0173848	0.145403	0.0109843	0.645454	0.0348339	0.0904242	0.046628	0.175641	0.00585149	0.00817214	0.0187819	0.28096	0.0234577	0.269742	0.0210088	0.0098873	0.0532439	0.0363483
Ravels	0.00340944	0.154993	0.110075	0.0275614	0.0199363	0.0825706	0.00507604	0.00439424	0.00356521	0.00382918	0.00342315	0.00394794	0.0173551	0.0283032	0.0190666	0.00497222	0.00643535	0.00786243	0.0448891	0.00897813	0.0175833	0.00251275	0.0276342	0.00567675	0.00637861	0.0467752	0.00254522	0.00473374	0.00859362	0.0102769	0.0509076	0.00576376	0.00880244	0.0135625	0.0277739	0.00261594	0.0203735	0.0183514	0.033781	0.0626462	0.0452143	0.00790008	0.0020985	0.0127203	0.0100481	0.233514	0.00556289	0.00437166	0.00868327
Retie	0.00252427	0.103167	0.153193	0.00312072	0.0654218	0.0281834	0.00455605	0.0032746	0.00317692	0.00294266	0.00254055	0.0027482	0.010122	0.0127179	0.293934	0.00404731	0.00471042	0.00371483	0.108531	0.00765775	0.0181635	0.00181886	0.0314681	0.0057138	0.00850715	0.0133017	0.00188476	0.00540857	0.0043442	0.00590216	0.116196	0.00435952	0.0155129	0.010968	0.0223181	0.00203468	0.0102872	0.0156209	0.0207315	0.0115822	0.223085	0.00571325	0.00156883	0.0106912	0.01322	0.0765573	0.00520718	0.00333143	0.00629116
Rijkevorsel	0.00551763	0.301283	0.0123971	0.01098	0.00894549	0.167539	0.00783684	0.00806379	0.00468327	0.00572132	0.00489472	0.00801495	0.0467553	0.194163	0.00605812	0.00767068	0.0113163	0.015518	0.0290833	0.0171392	0.0221012	0.00402487	0.0345781	0.00810491	0.00595892	0.300173	0.00452323	0.00535653	0.0220024	0.0244305	0.0259331	0.00957322	0.0064281	0.0230369	0.0498861	0.00436527	0.179308	0.0246861	0.00460174	0.0753111	0.0192228	0.0143207	0.00318133	0.0231019	0.0106076	0.0264575	0.00739102	0.00618448	0.0184681
Rumst	0.210214	1.28074	0.00275143	0.000711091	0.00475473	0.0066554	0.0237698	0.0793445	0.0742708	0.783243	0.0791426	0.0350914	0.0396118	0.015455	0.00214116	0.264823	0.180965	0.00606136	0.0144549	0.0105021	0.0551563	0.0817222	0.0178297	0.00915323	0.00816747	0.00694315	0.0629447	0.00927172	0.0096604	0.0237431	0.00631818	0.359028	0.0057038	0.156162	0.00884315	0.0963173	0.0092548	0.955441	0.0028464	0.00265448	0.0087059	0.162643	0.127906	0.0356911	0.00751733	0.00367305	0.0465615	0.174574	0.0460277
Schelle	0.438291	1.35699	0.00140592	0.000391648	0.00225452	0.00348256	0.00788982	0.0357308	0.0147714	0.332329	0.125337	0.0224195	0.028467	0.00934343	0.00104436	0.0394996	0.115734	0.00418538	0.00656241	0.0046038	0.018754	0.893953	0.00780031	0.00361242	0.00322714	0.00400079	0.030083	0.00342086	0.00688774	0.0187773	0.00303133	0.128162	0.00246156	0.0475706	0.00425779	0.0243852	0.00502351	0.134213	0.00129797	0.00143004	0.00413721	0.109408	1.13317	0.0140968	0.00318285	0.00188384	0.0124293	0.184904	0.0216882
Schilde	0.0340092	2.47969	0.00799381	0.00279982	0.0101849	0.0329059	0.0418801	0.0846309	0.019608	0.0292979	0.0202768	0.119805	0.414251	0.140969	0.0054516	0.0474655	0.0952805	0.021255	0.0362794	0.0600802	0.075479	0.0222437	0.0621703	0.0261423	0.0128214	0.0357042	0.0416251	0.0147088	0.047209	0.122153	0.020589	0.0694293	0.0104503	0.189675	0.0461155	0.034002	0.100373	0.10742	0.00598741	0.0120172	0.0203741	0.133014	0.016016	0.153654	0.0199643	0.0126998	0.0310859	0.0264104	0.437898
Schoten	0.0810516	11.4396	0.0105362	0.00375759	0.013574	0.0374181	0.0455432	0.166836	0.0304478	0.0620392	0.0457905	0.365997	2.68057	0.190478	0.00708573	0.0776	0.229737	0.044281	0.0438655	0.048139	0.0905143	0.0568176	0.0631737	0.026123	0.0162077	0.0485277	0.0894937	0.017636	0.115556	0.529673	0.024221	0.14611	0.0134395	0.240604	0.0444404	0.0594669	0.0882124	0.182109	0.00772668	0.0148554	0.0264654	0.339334	0.0366536	0.128177	0.021985	0.0158929	0.041926	0.0567452	0.380321
Sint-Katelijne-Waver	0.072812	1.14223	0.00480793	0.00115501	0.00892921	0.0116217	0.0899261	0.0952745	0.494694	0.110594	0.0412401	0.0408479	0.0496955	0.0231308	0.00394068	1.08776	0.13157	0.00782336	0.0296114	0.0237864	0.191651	0.0363708	0.0399294	0.024542	0.0200931	0.0108298	0.0592068	0.026754	0.0122592	0.027622	0.0120788	0.193126	0.0121929	0.523104	0.0173423	0.13675	0.0156474	1.93497	0.00566947	0.00445527	0.0164854	0.13602	0.0393407	0.0946414	0.0175072	0.00646925	0.299296	0.0723325	0.0823033
Stabroek	0.0218186	2.38137	0.00398352	0.00152735	0.00488588	0.0118358	0.00883325	0.0224022	0.00829261	0.0191789	0.0205987	0.0277512	0.309258	0.0620223	0.00253432	0.0165447	0.0401915	0.0510982	0.013612	0.00920047	0.0219971	0.0194698	0.0156016	0.00570399	0.00475345	0.0199265	0.0138829	0.00458822	0.160017	0.827477	0.00762515	0.0298262	0.00430254	0.038956	0.0111647	0.0106514	0.0200606	0.0524969	0.002594	0.00531045	0.0092568	0.0522431	0.0126756	0.0211775	0.00577903	0.00564456	0.0101826	0.0224224	0.0325843
Turnhout	0.0130812	0.592881	0.254731	0.051904	0.0745429	0.7866	0.0224481	0.0178655	0.014164	0.0145711	0.0125192	0.0158905	0.0673206	0.112445	0.0749186	0.0200295	0.0253632	0.0250559	0.228577	0.0461483	0.0772046	0.00945689	0.153952	0.0275217	0.0276849	0.158343	0.0101695	0.0211282	0.0300673	0.0380164	0.396627	0.0227088	0.0376414	0.0571876	0.192743	0.0105598	0.101719	0.0714255	0.0340861	0.326051	0.184616	0.0312357	0.00789074	0.0588409	0.051678	3.26313	0.0231324	0.0161838	0.0370424
Vorselaar	0.00572152	0.242057	0.00638148	0.00153692	0.00903298	0.0280444	0.0236658	0.0102221	0.0072103	0.00616893	0.00441449	0.00846399	0.0247125	0.0255154	0.00510261	0.0114203	0.0126019	0.00450873	0.0515158	0.411552	0.0636422	0.00376547	0.340692	0.0571007	0.0132304	0.0136706	0.00544104	0.0159097	0.00699118	0.0118772	0.0290892	0.011393	0.0109282	0.0434068	0.161863	0.00608179	0.036042	0.0332379	0.00620095	0.00776258	0.019909	0.0156694	0.0031472	0.0983406	0.0490111	0.0111855	0.015003	0.00602323	0.0282344
Vosselaar	0.00398615	0.185372	0.0321398	0.0110065	0.0161579	1.01624	0.0072629	0.00568786	0.00422168	0.00436768	0.00366743	0.00512366	0.0220227	0.0399317	0.0139345	0.00618784	0.00792471	0.00727631	0.0598225	0.017216	0.0238115	0.00285356	0.0540965	0.00921464	0.00787084	0.0512899	0.00320219	0.00639759	0.009303	0.0119788	0.0985406	0.00703354	0.00988018	0.0183748	0.096202	0.00330929	0.0444163	0.0212099	0.00819186	0.112594	0.0392247	0.00981936	0.00235885	0.0201819	0.01637	0.138185	0.00704683	0.00475448	0.0124228
Westerlo	0.010205	0.343549	0.016225	0.00228825	0.0571285	0.0266608	0.0344668	0.0140469	0.0205353	0.0126063	0.00950386	0.0103229	0.0273438	0.0239119	0.0203062	0.0214747	0.0192697	0.00688605	0.414157	0.0389729	0.242293	0.00687382	0.221607	0.0576767	0.590231	0.0160878	0.00800102	0.129838	0.00921879	0.0152422	0.0630463	0.0190528	0.371921	0.0597559	0.0499184	0.00971627	0.0206167	0.0861994	0.0670788	0.00934063	0.111948	0.0228504	0.00625688	0.0633811	0.244131	0.0203429	0.0430928	0.0133291	0.0261583
Wijnegem	0.029059	3.09445	0.00313883	0.00105089	0.00422676	0.0109743	0.018539	0.0852067	0.0111928	0.0217503	0.0143507	0.243072	0.280293	0.0451718	0.00217575	0.0317265	0.0971167	0.0103014	0.0141333	0.017754	0.0334211	0.0186322	0.0216068	0.00965978	0.00551277	0.0128434	0.0413752	0.00627619	0.0235577	0.0841323	0.00755849	0.059639	0.00439337	0.111415	0.0143058	0.026279	0.0252082	0.0659543	0.00246119	0.00423405	0.00824433	0.149756	0.0122725	0.0537928	0.00751532	0.00472884	0.0159025	0.0184963	0.26421
Willebroek	0.214079	1.68118	0.00410771	0.00105488	0.00714607	0.00945075	0.0257392	0.0678854	0.083723	1.45764	0.269369	0.0374784	0.053893	0.0218105	0.00318201	0.14983	0.155777	0.00950306	0.020625	0.0130664	0.067719	0.134522	0.0236172	0.01134	0.0114059	0.0101626	0.0512829	0.0120775	0.0145049	0.0343947	0.00901736	0.221078	0.00829041	0.138193	0.0119571	0.0619963	0.0125403	1.10598	0.00419145	0.00384806	0.0129147	0.151372	0.316124	0.0404977	0.01009	0.00537171	0.0516654	0.996887	0.0487504
Wommelgem	0.0483405	3.66005	0.00396536	0.00124884	0.0056089	0.0132398	0.0321583	0.229119	0.0184829	0.0352293	0.0207171	0.742355	0.198247	0.0454717	0.00283178	0.0604574	0.195701	0.0111068	0.0190913	0.0253241	0.0526133	0.0281967	0.0299712	0.0145751	0.00797598	0.014463	0.0951499	0.00945993	0.0232099	0.07393	0.0098059	0.115746	0.00610463	0.239026	0.018357	0.0563781	0.0278948	0.108463	0.00332778	0.00503885	0.0109015	0.313746	0.0189924	0.0896362	0.0106064	0.00590264	0.0265227	0.0276936	0.838666
Wuustwezel	0.0115456	0.789576	0.0091244	0.00556102	0.00851401	0.0388912	0.0101391	0.0153617	0.00733968	0.0113421	0.0105492	0.0170583	0.178042	0.797094	0.00499158	0.0130118	0.0231619	0.107225	0.0243147	0.0154555	0.0268026	0.0089452	0.0276481	0.00828828	0.00655813	0.134608	0.00885244	0.00605007	0.223516	0.112019	0.0165046	0.0186175	0.00655962	0.0359056	0.0259109	0.00780536	0.0754719	0.0416416	0.00434783	0.0194976	0.0169378	0.029761	0.00667196	0.0276109	0.00944787	0.0145805	0.0104064	0.0126738	0.0311212
Zandhoven	0.0164356	0.819029	0.00676251	0.00207427	0.00906789	0.0296092	0.0507623	0.0383803	0.0147652	0.0159167	0.0106624	0.0360914	0.0920923	0.0655351	0.00489434	0.0311388	0.0420498	0.0100632	0.0376642	0.167658	0.0835852	0.0104461	0.0902453	0.0414287	0.0130653	0.0231123	0.0189927	0.0164493	0.0184219	0.0373358	0.0209692	0.0350684	0.0101705	0.147381	0.0623445	0.0193555	0.0798924	0.0730068	0.00566766	0.00656821	0.0186706	0.0548183	0.0082144	0.322789	0.0253075	0.0111405	0.0280035	0.0144483	0.185176
Zoersel	0.0168197	0.908151	0.0163971	0.00637786	0.0172674	0.122901	0.0339979	0.030067	0.0147581	0.0168501	0.012843	0.0300005	0.135444	0.230503	0.0104477	0.0266551	0.0381643	0.0211642	0.0700044	0.124251	0.080253	0.0115312	0.140575	0.037006	0.0173739	0.0813563	0.0160285	0.0182672	0.0370358	0.0583908	0.0507484	0.0319113	0.0160607	0.0954626	0.212119	0.0157169	1.13541	0.0750927	0.0101337	0.0347814	0.036983	0.0490951	0.00906143	0.130558	0.0365625	0.0310009	0.0256379	0.0167811	0.0909446
Zwijndrecht	0.0995477	13.576	0.00342796	0.00108663	0.00488976	0.00925821	0.0131185	0.0563478	0.0157051	0.0658722	0.0727905	0.0634461	0.146445	0.0323763	0.00238308	0.0374486	0.141611	0.016673	0.0140296	0.0117357	0.0308038	0.123728	0.0167058	0.00700131	0.00585878	0.012195	0.0403197	0.00598188	0.03191	0.121245	0.00709061	0.0958517	0.00484261	0.0710154	0.0103077	0.0261787	0.0147102	0.112714	0.00271602	0.00391351	0.00910984	0.178061	0.0537706	0.0278596	0.00646591	0.00471447	0.0167961	0.0725041	0.0498792
[truncated: 21 more columns]

## Sheet: Fractional Flow Matrix
Gemeente	Aartselaar	Antwerpen	Arendonk	Baarle-Hertog	Balen	Beerse	Berlaar	Boechout	Bonheiden	Boom	Bornem	Borsbeek	Brasschaat	Brecht	Dessel	Duffel	Edegem	Essen	Geel	Grobbendonk	Heist-op-den-Berg	Hemiksem	Herentals	Herenthout	Herselt	Hoogstraten	Hove (Antwerpen)	Hulshout	Kalmthout	Kapellen	Kasterlee	Kontich	Laakdal	Lier	Lille	Lint	Malle	Mechelen	Meerhout	Merksplas	Mol	Mortsel	Niel	Nijlen	Olen	Oud-Turnhout	Putte	Puurs	Ranst
Aartselaar	0	0.00505333	4.27917e-06	1.19854e-06	6.82615e-06	1.10153e-05	2.88619e-05	0.000194351	4.84819e-05	0.000738237	0.000164393	0.000102809	9.56868e-05	2.99226e-05	3.18656e-06	0.000173927	0.000878345	1.22003e-05	2.05502e-05	1.58996e-05	6.31232e-05	0.000823382	2.56813e-05	1.23368e-05	1.0175e-05	1.23838e-05	0.000188489	1.11976e-05	2.08524e-05	5.90353e-05	9.55679e-06	0.00107415	7.60034e-06	0.000200173	1.39167e-05	0.000130877	1.65555e-05	0.000420681	3.98036e-06	4.45274e-06	1.26311e-05	0.000700617	0.000471871	5.15405e-05	1.03442e-05	5.81678e-06	4.28632e-05	0.000255814	8.90559e-05
Antwerpen	0.00505333	0	0.000181773	5.86558e-05	0.000255488	0.000532865	0.000846524	0.00521123	0.000838153	0.00291357	0.00222466	0.00900986	0.0122901	0.00199723	0.000126558	0.00232691	0.0124302	0.000793185	0.000772867	0.000661688	0.00180039	0.00417364	0.000997277	0.000432203	0.000320387	0.000680126	0.00357865	0.000341603	0.00169653	0.00766669	0.000395814	0.00656556	0.000259106	0.00509551	0.000623139	0.0018779	0.000942429	0.00570358	0.000144629	0.00021899	0.000483183	0.0185136	0.00200618	0.00191156	0.000375097	0.000257509	0.000969225	0.00258418	0.00448795
Arendonk	4.27917e-06	0.000181773	0	9.13407e-06	5.69627e-05	5.87115e-05	6.91232e-06	5.47133e-06	4.97184e-06	4.93282e-06	4.36509e-06	4.70636e-06	1.85904e-05	2.52848e-05	8.60393e-05	6.53353e-06	7.95987e-06	7.63711e-06	9.67327e-05	1.15471e-05	2.59956e-05	3.12504e-06	4.11763e-05	8.09441e-06	1.08781e-05	3.07267e-05	3.16131e-06	7.36715e-06	8.55064e-06	1.10176e-05	0.000105791	7.28001e-06	1.73852e-05	1.75531e-05	3.3672e-05	3.34146e-06	1.91043e-05	2.50389e-05	1.90173e-05	2.9031e-05	0.000141118	9.69053e-06	2.66532e-06	1.65078e-05	1.63205e-05	0.000244831	7.88e-06	5.64948e-06	1.04728e-05
Baarle-Hertog	1.19854e-06	5.86558e-05	9.13407e-06	0	3.80988e-06	3.28143e-05	1.61332e-06	1.56693e-06	1.12545e-06	1.31077e-06	1.18495e-06	1.45875e-06	7.2917e-06	1.50853e-05	2.94415e-06	1.66004e-06	2.29107e-06	3.75192e-06	9.60338e-06	2.89302e-06	5.19246e-06	8.9259e-07	7.60131e-06	1.69417e-06	1.67424e-06	4.53325e-05	9.01348e-07	1.3317e-06	3.99833e-06	4.33277e-06	9.37675e-06	2.00897e-06	2.07808e-06	4.57037e-06	8.38349e-06	8.98627e-07	9.35144e-06	5.92447e-06	1.68885e-06	5.03782e-05	8.1937e-06	2.83947e-06	7.29222e-07	4.18942e-06	2.63872e-06	1.90501e-05	1.72093e-06	1.49218e-06	3.13725e-06
Balen	6.82615e-06	0.000255488	5.69627e-05	3.80988e-06	0	3.3466e-05	1.26515e-05	8.48139e-06	9.92406e-06	8.29053e-06	7.14457e-06	6.79307e-06	2.24376e-05	2.35026e-05	0.000179365	1.1426e-05	1.23456e-05	7.80527e-06	0.000362036	1.7164e-05	5.75959e-05	4.89596e-06	7.22443e-05	1.52935e-05	3.60044e-05	2.05589e-05	4.93321e-06	1.83437e-05	9.19998e-06	1.33104e-05	0.000100398	1.17562e-05	9.90679e-05	2.94305e-05	3.6075e-05	5.50452e-06	1.79479e-05	4.76226e-05	0.000255768	1.35794e-05	0.00252747	1.47769e-05	4.34999e-06	2.67494e-05	3.74529e-05	4.39228e-05	1.619e-05	9.52378e-06	1.5269e-05
Beerse	1.10153e-05	0.000532865	5.87115e-05	3.28143e-05	3.3466e-05	0	1.91341e-05	1.59213e-05	1.10223e-05	1.18849e-05	9.98791e-06	1.46992e-05	6.73682e-05	0.00014175	2.63499e-05	1.67037e-05	2.21462e-05	2.19888e-05	0.000120186	4.63519e-05	5.97434e-05	7.90624e-06	0.000125671	2.32139e-05	1.8411e-05	0.000196976	8.9402e-06	1.55542e-05	2.87804e-05	3.61227e-05	0.000154802	1.94132e-05	2.18464e-05	5.01417e-05	0.000239082	9.08883e-06	0.000171512	5.60026e-05	1.71356e-05	0.000491293	7.77199e-05	2.76116e-05	6.45868e-06	5.47948e-05	3.72622e-05	0.000189895	1.82165e-05	1.28764e-05	3.55971e-05
Berlaar	2.88619e-05	0.000846524	6.91232e-06	1.61332e-06	1.26515e-05	1.91341e-05	0	6.19579e-05	6.36073e-05	3.29329e-05	1.83619e-05	3.56738e-05	5.46582e-05	3.18151e-05	5.84613e-06	0.00011168	6.71766e-05	8.2161e-06	5.25615e-05	8.55813e-05	0.000679655	1.66315e-05	0.000107647	0.000126026	3.52689e-05	1.4947e-05	3.18917e-05	6.99464e-05	1.3055e-05	2.61611e-05	2.10566e-05	6.99077e-05	1.92077e-05	0.000665162	3.71507e-05	4.88165e-05	2.68692e-05	0.000238955	8.68489e-06	6.73239e-06	2.46357e-05	7.94622e-05	1.49345e-05	0.000695564	4.41697e-05	9.93064e-06	0.000240003	2.74526e-05	0.000130659
Boechout	0.000194351	0.00521123	5.47133e-06	1.56693e-06	8.48139e-06	1.59213e-05	6.19579e-05	0	5.08315e-05	0.000122399	5.09794e-05	0.000531691	0.00014862	4.43064e-05	4.08094e-06	0.000282001	0.00171105	1.35348e-05	2.81457e-05	3.09585e-05	9.93354e-05	8.27567e-05	4.14621e-05	2.20779e-05	1.36271e-05	1.67241e-05	0.00272499	1.66044e-05	2.50716e-05	7.25792e-05	1.33631e-05	0.000923884	9.80695e-06	0.00076573	2.23546e-05	0.00054574	2.74198e-05	0.00032488	5.10573e-06	6.14062e-06	1.61385e-05	0.00250119	5.83917e-05	0.000123733	1.58003e-05	7.79867e-06	6.32357e-05	7.44944e-05	0.000426351
Bonheiden	4.84819e-05	0.000838153	4.97184e-06	1.12545e-06	9.92406e-06	1.10223e-05	6.36073e-05	5.08315e-05	0	8.26612e-05	3.86419e-05	2.61549e-05	3.95589e-05	2.02073e-05	4.20457e-06	0.000227253	7.6513e-05	7.24457e-06	3.16601e-05	2.01125e-05	0.000207105	2.74775e-05	3.8434e-05	2.23166e-05	2.43402e-05	1.01199e-05	3.19161e-05	3.03945e-05	1.07755e-05	2.28326e-05	1.22423e-05	0.000100913	1.4202e-05	0.000231328	1.60864e-05	5.50127e-05	1.36062e-05	0.00343798	6.34871e-06	4.27067e-06	1.79482e-05	8.11507e-05	3.11265e-05	6.93133e-05	1.78836e-05	6.49015e-06	0.000354329	6.8167e-05	5.18178e-05
Boom	0.000738237	0.00291357	4.93282e-06	1.31077e-06	8.29053e-06	1.18849e-05	3.29329e-05	0.000122399	8.26612e-05	0	0.000307057	6.41324e-05	7.89626e-05	2.94127e-05	3.76404e-06	0.000221276	0.000333286	1.23599e-05	2.44221e-05	1.68954e-05	7.94704e-05	0.000341248	2.91149e-05	1.40896e-05	1.29648e-05	1.29765e-05	0.000100325	1.40445e-05	1.96975e-05	4.98044e-05	1.09333e-05	0.000518583	9.48684e-06	0.000200334	1.50859e-05	0.000110769	1.6569e-05	0.000913459	4.85807e-06	4.82129e-06	1.51391e-05	0.000303166	0.00109798	5.38701e-05	1.21468e-05	6.55817e-06	5.89328e-05	0.000795422	7.39311e-05
Bornem	0.000164393	0.00222466	4.36509e-06	1.18495e-06	7.14457e-06	9.98791e-06	1.83619e-05	5.09794e-05	3.86419e-05	0.000307057	0	3.57723e-05	6.64467e-05	2.52913e-05	3.24541e-06	6.83713e-05	0.000122634	1.30908e-05	1.95537e-05	1.15531e-05	4.9558e-05	0.000214258	2.12775e-05	9.31014e-06	9.56897e-06	1.17047e-05	3.77122e-05	9.48801e-06	1.9583e-05	4.72841e-05	8.97341e-06	0.000130036	7.56028e-06	9.10873e-05	1.1637e-05	3.55238e-05	1.32553e-05	0.000349439	4.02275e-06	4.19855e-06	1.2881e-05	0.000128613	0.000330727	3.25737e-05	8.89464e-06	5.67251e-06	3.12544e-05	0.00211835	4.18338e-05
Borsbeek	0.000102809	0.00900986	4.70636e-06	1.45875e-06	6.79307e-06	1.46992e-05	3.56738e-05	0.000531691	2.61549e-05	6.41324e-05	3.57723e-05	0	0.000234954	4.95862e-05	3.37264e-06	9.3292e-05	0.000548225	1.4325e-05	2.22735e-05	2.5007e-05	6.24595e-05	5.74637e-05	3.26554e-05	1.57249e-05	9.63544e-06	1.65996e-05	0.000244879	1.11774e-05	2.94783e-05	0.000101064	1.12173e-05	0.000246907	7.36924e-06	0.000284401	1.95148e-05	9.75513e-05	2.82523e-05	0.000163897	3.99436e-06	5.72845e-06	1.30375e-05	0.00107616	3.55975e-05	8.61525e-05	1.19628e-05	6.83982e-06	3.40253e-05	4.75906e-05	0.000414069
Brasschaat	9.56868e-05	0.0122901	1.85904e-05	7.2917e-06	2.24376e-05	6.73682e-05	5.46582e-05	0.00014862	3.95589e-05	7.89626e-05	6.64467e-05	0.000234954	0	0.000477786	1.19565e-05	8.85098e-05	0.000225589	0.000117315	6.94068e-05	6.42475e-05	0.000120596	7.30044e-05	9.27347e-05	3.49535e-05	2.38128e-05	0.000102825	8.43514e-05	2.4545e-05	0.000412777	0.00295633	4.0049e-05	0.000156368	2.08058e-05	0.000251665	7.02053e-05	6.1724e-05	0.000159387	0.00023709	1.23858e-05	2.80174e-05	4.37418e-05	0.000312992	4.80552e-05	0.00015004	3.229e-05	2.81346e-05	5.35944e-05	7.93363e-05	0.000297858
Brecht	2.99226e-05	0.00199723	2.52848e-05	1.50853e-05	2.35026e-05	0.00014175	3.18151e-05	4.43064e-05	2.02073e-05	2.94127e-05	2.52913e-05	4.95862e-05	0.000477786	0	1.40837e-05	3.66594e-05	6.32829e-05	0.000113622	7.32733e-05	5.66127e-05	8.08884e-05	2.22809e-05	9.32765e-05	2.72593e-05	1.91231e-05	0.000381468	2.48726e-05	1.82306e-05	0.000243505	0.000229848	5.18339e-05	5.07597e-05	1.88244e-05	0.000109191	9.78944e-05	2.22195e-05	0.000495122	0.000111608	1.23907e-05	6.32002e-05	4.78691e-05	8.2004e-05	1.67237e-05	9.38973e-05	3.01361e-05	4.35106e-05	3.01586e-05	3.11884e-05	0.000102331
Dessel	3.18656e-06	0.000126558	8.60393e-05	2.94415e-06	0.000179365	2.63499e-05	5.84613e-06	4.08094e-06	4.20457e-06	3.76404e-06	3.24541e-06	3.37264e-06	1.19565e-05	1.40837e-05	0	5.19013e-06	5.89003e-06	4.30675e-06	0.000171166	9.21093e-06	2.43447e-05	2.29265e-06	3.89917e-05	7.31308e-06	1.25052e-05	1.37704e-05	2.35747e-06	7.43494e-06	5.04832e-06	7.01137e-06	0.0001062	5.5017e-06	2.57122e-05	1.3863e-05	2.40522e-05	2.57305e-06	1.11837e-05	2.04956e-05	4.21577e-05	1.07319e-05	0.00082166	7.1126e-06	1.99574e-06	1.3275e-05	1.76444e-05	5.09798e-05	6.89779e-06	4.27915e-06	7.6881e-06
Duffel	0.000173927	0.00232691	6.53353e-06	1.66004e-06	1.1426e-05	1.67037e-05	0.00011168	0.000282001	0.000227253	0.000221276	6.83713e-05	9.3292e-05	8.85098e-05	3.66594e-05	5.19013e-06	0	0.000370181	1.2229e-05	3.77915e-05	3.39903e-05	0.000197078	7.45617e-05	5.26336e-05	3.1187e-05	2.2684e-05	1.61802e-05	0.000181565	2.93094e-05	2.00015e-05	4.82371e-05	1.62235e-05	0.000660615	1.46767e-05	0.001181	2.44486e-05	0.000728997	2.41325e-05	0.00146708	0.000174278	6.42114e-06	2.12916e-05	0.000362223	7.63927e-05	0.00014064	2.19704e-05	8.94378e-06	0.000203976	0.000118265	0.00016818
Edegem	0.000878345	0.0124302	7.95987e-06	2.29107e-06	1.23456e-05	2.21462e-05	6.71766e-05	0.00171105	7.6513e-05	0.000333286	0.000122634	0.000548225	0.000225589	6.32829e-05	5.89003e-06	0.000370181	0	2.21008e-05	3.9101e-05	3.64681e-05	0.00012589	0.00028388	5.32777e-05	2.66723e-05	1.88232e-05	2.43889e-05	0.00350003	2.17924e-05	4.04597e-05	0.00012219	1.85676e-05	0.00394026	1.38935e-05	0.00060086	2.926e-05	0.000502609	3.63866e-05	0.000554785	7.29626e-06	8.75255e-06	2.32312e-05	0.023947	0.000170734	0.000128884	2.07434e-05	1.11387e-05	8.18311e-05	0.00017784	0.000316774
Essen	1.22003e-05	0.000793185	7.63711e-06	3.75192e-06	7.80527e-06	2.19888e-05	8.2161e-06	1.35348e-05	7.24457e-06	1.23599e-05	1.30908e-05	1.4325e-05	0.000117315	0.000113622	4.30675e-06	1.2229e-05	2.21008e-05	0	1.98978e-05	1.02843e-05	2.29596e-05	1.00934e-05	1.99726e-05	6.29414e-06	5.82935e-06	5.49343e-05	8.12669e-06	5.17088e-06	0.000260755	0.000107501	1.23062e-05	1.81007e-05	5.88165e-06	3.01074e-05	1.59819e-05	7.15379e-06	2.93381e-05	4.28569e-05	3.85989e-06	1.13432e-05	1.48756e-05	2.78049e-05	7.56133e-06	2.01051e-05	7.35578e-06	1.0757e-05	9.48165e-06	1.50176e-05	2.28538e-05
Geel	2.05502e-05	0.000772867	9.67327e-05	9.60338e-06	0.000362036	0.000120186	5.25615e-05	2.81457e-05	3.16601e-05	2.44221e-05	1.95537e-05	2.22735e-05	6.94068e-05	7.32733e-05	0.000171166	3.77915e-05	3.9101e-05	1.98978e-05	0	8.83778e-05	0.000251603	1.42609e-05	0.00059255	8.48112e-05	0.000169908	5.79659e-05	1.60106e-05	9.01429e-05	2.55693e-05	3.8858e-05	0.000653876	3.71706e-05	0.000423195	0.00010687	0.000203611	1.82529e-05	6.62877e-05	0.000144947	0.000497232	4.06617e-05	0.00107199	4.70633e-05	1.25691e-05	0.000117183	0.000364501	0.000120248	5.85588e-05	2.65291e-05	5.5185e-05
Grobbendonk	1.58996e-05	0.000661688	1.15471e-05	2.89302e-06	1.7164e-05	4.63519e-05	8.55813e-05	3.09585e-05	2.01125e-05	1.68954e-05	1.15531e-05	2.5007e-05	6.42475e-05	5.66127e-05	9.21093e-06	3.39903e-05	3.64681e-05	1.02843e-05	8.83778e-05	0	0.000182311	1.02119e-05	0.000409318	0.000190261	2.94417e-05	2.71731e-05	1.61149e-05	4.02552e-05	1.6563e-05	3.00472e-05	4.52164e-05	3.29886e-05	2.18609e-05	0.000144672	0.000164385	1.83618e-05	7.27686e-05	9.15641e-05	1.17001e-05	1.38654e-05	3.65168e-05	4.55154e-05	8.51352e-06	0.00050495	8.57861e-05	1.92059e-05	4.39074e-05	1.59324e-05	9.47026e-05
Heist-op-den-Berg	6.31232e-05	0.00180039	2.59956e-05	5.19246e-06	5.75959e-05	5.97434e-05	0.000679655	9.93354e-05	0.000207105	7.94704e-05	4.9558e-05	6.24595e-05	0.000120596	8.08884e-05	2.43447e-05	0.000197078	0.00012589	2.29596e-05	0.000251603	0.000182311	0	3.88738e-05	0.0004209	0.000438783	0.000316247	4.36531e-05	5.52737e-05	0.0014661	3.385e-05	6.44386e-05	8.19393e-05	0.000133308	0.000114383	0.000612079	0.000114437	7.84547e-05	6.72185e-05	0.000688488	4.32893e-05	2.1205e-05	0.000109669	0.000146468	3.64835e-05	0.000572402	0.000235928	3.53596e-05	0.000945451	7.40179e-05	0.000176059
Hemiksem	0.000823382	0.00417364	3.12504e-06	8.9259e-07	4.89596e-06	7.90624e-06	1.66315e-05	8.27567e-05	2.74775e-05	0.000341248	0.000214258	5.74637e-05	7.30044e-05	2.22809e-05	2.29265e-06	7.45617e-05	0.00028388	1.00934e-05	1.42609e-05	1.02119e-05	3.88738e-05	0	1.70687e-05	7.78558e-06	6.78317e-06	9.28301e-06	6.96737e-05	7.16654e-06	1.70572e-05	4.90374e-05	6.73154e-06	0.000259297	5.25004e-06	0.000100593	9.53679e-06	4.98234e-05	1.16813e-05	0.000233122	2.80101e-06	3.25745e-06	9.01705e-06	0.000279973	0.000533849	3.08724e-05	6.87491e-06	4.21509e-06	2.47254e-05	0.000254486	5.05469e-05
Herentals	2.56813e-05	0.000997277	4.11763e-05	7.60131e-06	7.22443e-05	0.000125671	0.000107647	4.14621e-05	3.8434e-05	2.91149e-05	2.12775e-05	3.26554e-05	9.27347e-05	9.32765e-05	3.89917e-05	5.26336e-05	5.32777e-05	1.99726e-05	0.00059255	0.000409318	0.0004209	1.70687e-05	0	0.00035597	0.0001246	5.84446e-05	2.26648e-05	0.000134372	2.8863e-05	4.7637e-05	0.000239387	4.99403e-05	0.000106008	0.000179311	0.000546794	2.62638e-05	0.000106557	0.0001708	5.70063e-05	3.64393e-05	0.000164796	6.50395e-05	1.47157e-05	0.000307799	0.00131458	6.73052e-05	8.2528e-05	2.92746e-05	9.67534e-05
Herenthout	1.23368e-05	0.000432203	8.09441e-06	1.69417e-06	1.52935e-05	2.32139e-05	0.000126026	2.20779e-05	2.23166e-05	1.40896e-05	9.31014e-06	1.57249e-05	3.49535e-05	2.72593e-05	7.31308e-06	3.1187e-05	2.66723e-05	6.29414e-06	8.48112e-05	0.000190261	0.000438783	7.78558e-06	0.00035597	0	4.70388e-05	1.44946e-05	1.17923e-05	0.000100403	9.56963e-06	1.75802e-05	3.12768e-05	2.58827e-05	2.58528e-05	0.000123475	6.24688e-05	1.49049e-05	2.74217e-05	9.13819e-05	1.15306e-05	7.51491e-06	3.15048e-05	3.22601e-05	6.82915e-06	0.000316472	0.000134729	1.21423e-05	6.08897e-05	1.32556e-05	5.2611e-05
Herselt	1.0175e-05	0.000320387	1.08781e-05	1.67424e-06	3.60044e-05	1.8411e-05	3.52689e-05	1.36271e-05	2.43402e-05	1.29648e-05	9.56897e-06	9.63544e-06	2.38128e-05	1.91231e-05	1.25052e-05	2.2684e-05	1.88232e-05	5.82935e-06	0.000169908	2.94417e-05	0.000316247	6.78317e-06	0.0001246	4.70388e-05	0	1.22767e-05	7.82108e-06	0.00019997	7.85259e-06	1.3402e-05	3.56463e-05	1.90811e-05	0.00017435	5.98587e-05	3.21727e-05	9.81434e-06	1.56573e-05	9.71111e-05	3.48619e-05	6.65368e-06	6.55057e-05	2.20952e-05	6.31565e-06	5.64093e-05	0.000105158	1.34408e-05	5.32135e-05	1.36681e-05	2.3897e-05
Hoogstraten	1.23838e-05	0.000680126	3.07267e-05	4.53325e-05	2.05589e-05	0.000196976	1.4947e-05	1.67241e-05	1.01199e-05	1.29765e-05	1.17047e-05	1.65996e-05	0.000102825	0.000381468	1.37704e-05	1.61802e-05	2.43889e-05	5.49343e-05	5.79659e-05	2.71731e-05	4.36531e-05	9.28301e-06	5.84446e-05	1.44946e-05	1.22767e-05	0	9.55908e-06	1.05899e-05	6.38577e-05	5.9723e-05	4.84963e-05	2.06909e-05	1.36415e-05	4.56281e-05	6.70252e-05	9.13651e-06	0.000150231	5.45277e-05	9.96687e-06	0.000153514	4.28459e-05	3.06889e-05	7.33786e-06	4.08624e-05	1.94303e-05	5.78699e-05	1.52323e-05	1.45369e-05	3.49244e-05
Hove (Antwerpen)	0.000188489	0.00357865	3.16131e-06	9.01348e-07	4.93321e-06	8.9402e-06	3.18917e-05	0.00272499	3.19161e-05	0.000100325	3.77122e-05	0.000244879	8.43514e-05	2.48726e-05	2.35747e-06	0.000181565	0.00350003	8.12669e-06	1.60106e-05	1.61149e-05	5.52737e-05	6.96737e-05	2.26648e-05	1.17923e-05	7.82108e-06	9.55908e-06	0	9.32863e-06	1.48736e-05	4.34893e-05	7.56054e-06	0.00123005	5.66415e-06	0.000342847	1.22337e-05	0.000355277	1.49213e-05	0.000218348	2.94889e-06	3.48823e-06	9.32698e-06	0.00358064	4.76391e-05	6.0985e-05	8.76599e-06	4.45613e-06	3.63532e-05	5.57085e-05	0.000167618
Hulshout	1.11976e-05	0.000341603	7.36715e-06	1.3317e-06	1.83437e-05	1.55542e-05	6.99464e-05	1.66044e-05	3.03945e-05	1.40445e-05	9.48801e-06	1.11774e-05	2.4545e-05	1.82306e-05	7.43494e-06	2.93094e-05	2.17924e-05	5.17088e-06	9.01429e-05	4.02552e-05	0.0014661	7.16654e-06	0.000134372	0.000100403	0.00019997	1.05899e-05	9.32863e-06	0	7.36879e-06	1.33114e-05	2.49254e-05	2.23958e-05	4.63293e-05	8.63454e-05	3.06721e-05	1.23564e-05	1.55286e-05	0.000111393	1.51425e-05	5.46468e-06	3.51223e-05	2.55524e-05	6.65472e-06	9.15282e-05	9.88582e-05	9.8399e-06	9.15118e-05	1.38319e-05	3.03506e-05
Kalmthout	2.08524e-05	0.00169653	8.55064e-06	3.99833e-06	9.19998e-06	2.87804e-05	1.3055e-05	2.50716e-05	1.07755e-05	1.96975e-05	1.9583e-05	2.94783e-05	0.000412777	0.000243505	5.04832e-06	2.00015e-05	4.04597e-05	0.000260755	2.55693e-05	1.6563e-05	3.385e-05	1.70572e-05	2.8863e-05	9.56963e-06	7.85259e-06	6.38577e-05	1.48736e-05	7.36879e-06	0	0.000455754	1.56387e-05	3.1497e-05	7.51498e-06	4.81084e-05	2.33101e-05	1.23671e-05	5.13071e-05	6.41903e-05	4.76104e-06	1.36319e-05	1.77834e-05	5.22931e-05	1.21294e-05	3.36652e-05	1.03208e-05	1.26348e-05	1.4554e-05	2.25689e-05	4.4448e-05
Kapellen	5.90353e-05	0.00766669	1.10176e-05	4.33277e-06	1.33104e-05	3.61227e-05	2.61611e-05	7.25792e-05	2.28326e-05	4.98044e-05	4.72841e-05	0.000101064	0.00295633	0.000229848	7.01137e-06	4.82371e-05	0.00012219	0.000107501	3.8858e-05	3.00472e-05	6.44386e-05	4.90374e-05	4.7637e-05	1.75802e-05	1.3402e-05	5.9723e-05	4.34893e-05	1.33114e-05	0.000455754	0	2.21696e-05	8.7178e-05	1.19573e-05	0.000123069	3.51511e-05	3.23219e-05	7.09308e-05	0.00014112	7.18315e-06	1.57366e-05	2.55692e-05	0.000164128	3.17222e-05	6.93374e-05	1.71512e-05	1.61294e-05	2.93122e-05	5.3871e-05	0.000118663
Kasterlee	9.55679e-06	0.000395814	0.000105791	9.37675e-06	0.000100398	0.000154802	2.10566e-05	1.33631e-05	1.22423e-05	1.09333e-05	8.97341e-06	1.12173e-05	4.0049e-05	5.18339e-05	0.0001062	1.62235e-05	1.85676e-05	1.23062e-05	0.000653876	4.52164e-05	8.19393e-05	6.73154e-06	0.000239387	3.12768e-05	3.56463e-05	4.84963e-05	7.56054e-06	2.49254e-05	1.56387e-05	2.21696e-05	0	1.70909e-05	5.62391e-05	4.72351e-05	0.000195396	8.2328e-06	5.1215e-05	5.87844e-05	5.83413e-05	4.58723e-05	0.000311879	2.26592e-05	5.75891e-06	5.32377e-05	8.56118e-05	0.00021055	2.15312e-05	1.19005e-05	2.77222e-05
Kontich	0.00107415	0.00656556	7.28001e-06	2.00897e-06	1.17562e-05	1.94132e-05	6.99077e-05	0.000923884	0.000100913	0.000518583	0.000130036	0.000246907	0.000156368	5.07597e-05	5.5017e-06	0.000660615	0.00394026	1.81007e-05	3.71706e-05	3.29886e-05	0.000133308	0.000259297	4.99403e-05	2.58827e-05	1.90811e-05	2.06909e-05	0.00123005	2.23958e-05	3.1497e-05	8.7178e-05	1.70909e-05	0	1.36605e-05	0.000652115	2.61288e-05	0.00092551	3.01508e-05	0.000793684	7.02027e-06	7.6507e-06	2.19622e-05	0.0022808	0.000205961	0.000120011	1.99394e-05	1.00536e-05	9.67091e-05	0.000209907	0.000231864
Laakdal	7.60034e-06	0.000259106	1.73852e-05	2.07808e-06	9.90679e-05	2.18464e-05	1.92077e-05	9.80695e-06	1.4202e-05	9.48684e-06	7.56028e-06	7.36924e-06	2.08058e-05	1.88244e-05	2.57122e-05	1.46767e-05	1.38935e-05	5.88165e-06	0.000423195	2.18609e-05	0.000114383	5.25004e-06	0.000106008	2.58528e-05	0.00017435	1.36415e-05	5.66415e-06	4.63293e-05	7.51498e-06	1.19573e-05	5.62391e-05	1.36605e-05	0	3.83046e-05	3.35483e-05	6.7055e-06	1.52427e-05	6.24857e-05	0.00016876	8.06823e-06	0.000169553	1.64594e-05	4.78906e-06	3.62381e-05	7.94415e-05	1.93616e-05	2.61489e-05	1.04594e-05	1.75158e-05
Lier	0.000200173	0.00509551	1.75531e-05	4.57037e-06	2.94305e-05	5.01417e-05	0.000665162	0.00076573	0.000231328	0.000200334	9.10873e-05	0.000284401	0.000251665	0.000109191	1.3863e-05	0.001181	0.00060086	3.01074e-05	0.00010687	0.000144672	0.000612079	0.000100593	0.000179311	0.000123475	5.98587e-05	4.56281e-05	0.000342847	8.63454e-05	4.81084e-05	0.000123069	4.72351e-05	0.000652115	3.83046e-05	0	8.17705e-05	0.000737171	8.00555e-05	0.00110193	1.87313e-05	1.84766e-05	5.64164e-05	0.000703107	8.69556e-05	0.000882056	6.99093e-05	2.50922e-05	0.000435359	0.000139263	0.00102926
Lille	1.39167e-05	0.000623139	3.3672e-05	8.38349e-06	3.6075e-05	0.000239082	3.71507e-05	2.23546e-05	1.60864e-05	1.50859e-05	1.1637e-05	1.95148e-05	7.02053e-05	9.78944e-05	2.40522e-05	2.44486e-05	2.926e-05	1.59819e-05	0.000203611	0.000164385	0.000114437	9.53679e-06	0.000546794	6.24688e-05	3.21727e-05	6.70252e-05	1.22337e-05	3.06721e-05	2.33101e-05	3.51511e-05	0.000195396	2.61288e-05	3.35483e-05	8.17705e-05	0	1.30854e-05	0.000158584	7.72612e-05	2.28498e-05	5.01781e-05	8.4977e-05	3.63873e-05	7.9151e-06	0.000121309	0.000103206	7.19188e-05	2.99727e-05	1.54978e-05	5.55471e-05
Lint	0.000130877	0.0018779	3.34146e-06	8.98627e-07	5.50452e-06	9.08883e-06	4.88165e-05	0.00054574	5.50127e-05	0.000110769	3.55238e-05	9.75513e-05	6.1724e-05	2.22195e-05	2.57305e-06	0.000728997	0.000502609	7.15379e-06	1.82529e-05	1.83618e-05	7.84547e-05	4.98234e-05	2.62638e-05	1.49049e-05	9.81434e-06	9.13651e-06	0.000355277	1.23564e-05	1.23671e-05	3.23219e-05	8.2328e-06	0.00092551	6.7055e-06	0.000737171	1.30854e-05	0	1.42448e-05	0.000362814	3.36831e-06	3.49832e-06	1.03633e-05	0.000473601	4.30391e-05	7.68403e-05	1.04702e-05	4.66316e-06	6.13147e-05	5.71185e-05	0.000144193
Malle	1.65555e-05	0.000942429	1.91043e-05	9.35144e-06	1.79479e-05	0.000171512	2.68692e-05	2.74198e-05	1.36062e-05	1.6569e-05	1.32553e-05	2.82523e-05	0.000159387	0.000495122	1.11837e-05	2.41325e-05	3.63866e-05	2.93381e-05	6.62877e-05	7.27686e-05	6.72185e-05	1.16813e-05	0.000106557	2.74217e-05	1.56573e-05	0.000150231	1.49213e-05	1.55286e-05	5.13071e-05	7.09308e-05	5.1215e-05	3.01508e-05	1.52427e-05	8.00555e-05	0.000158584	1.42448e-05	0	7.0978e-05	1.00196e-05	5.26759e-05	3.82368e-05	4.67818e-05	9.09256e-06	9.11607e-05	3.00666e-05	3.7067e-05	2.24114e-05	1.70032e-05	7.43543e-05
Mechelen	0.000420681	0.00570358	2.50389e-05	5.92447e-06	4.76226e-05	5.60026e-05	0.000238955	0.00032488	0.00343798	0.000913459	0.000349439	0.000163897	0.00023709	0.000111608	2.04956e-05	0.00146708	0.000554785	4.28569e-05	0.000144947	9.15641e-05	0.000688488	0.000233122	0.0001708	9.13819e-05	9.71111e-05	5.45277e-05	0.000218348	0.000111393	6.41903e-05	0.00014112	5.87844e-05	0.000793684	6.24857e-05	0.00110193	7.72612e-05	0.000362814	7.0978e-05	0	2.93598e-05	2.21274e-05	8.58953e-05	0.000565982	0.000299971	0.000304924	7.67552e-05	3.26321e-05	0.000764793	0.000693469	0.000280082
Meerhout	3.98036e-06	0.000144629	1.90173e-05	1.68885e-06	0.000255768	1.71356e-05	8.68489e-06	5.10573e-06	6.34871e-06	4.85807e-06	4.02275e-06	3.99436e-06	1.23858e-05	1.23907e-05	4.21577e-05	0.000174278	7.29626e-06	3.85989e-06	0.000497232	1.17001e-05	4.32893e-05	2.80101e-06	5.70063e-05	1.15306e-05	3.48619e-05	9.96687e-06	2.94889e-06	1.51425e-05	4.76104e-06	7.18315e-06	5.83413e-05	7.02027e-06	0.00016876	1.87313e-05	2.28498e-05	3.36831e-06	1.00196e-05	2.93598e-05	0	6.45628e-06	0.000463946	8.71226e-06	2.50702e-06	1.79407e-05	3.44287e-05	1.87495e-05	1.10136e-05	5.44775e-06	9.33096e-06
Merksplas	4.45274e-06	0.00021899	2.9031e-05	5.03782e-05	1.35794e-05	0.000491293	6.73239e-06	6.14062e-06	4.27067e-06	4.82129e-06	4.19855e-06	5.72845e-06	2.80174e-05	6.32002e-05	1.07319e-05	6.42114e-06	8.75255e-06	1.13432e-05	4.06617e-05	1.38654e-05	2.1205e-05	3.25745e-06	3.64393e-05	7.51491e-06	6.65368e-06	0.000153514	3.48823e-06	5.46468e-06	1.36319e-05	1.57366e-05	4.58723e-05	7.6507e-06	8.06823e-06	1.84766e-05	5.01781e-05	3.49832e-06	5.26759e-05	2.21274e-05	6.45628e-06	0	3.04663e-05	1.08926e-05	2.65398e-06	1.83826e-05	1.17786e-05	8.59367e-05	6.77579e-06	5.34585e-06	1.30315e-05
Mol	1.26311e-05	0.000483183	0.000141118	8.1937e-06	0.00252747	7.77199e-05	2.46357e-05	1.61385e-05	1.79482e-05	1.51391e-05	1.2881e-05	1.30375e-05	4.37418e-05	4.78691e-05	0.00082166	2.12916e-05	2.32312e-05	1.48756e-05	0.00107199	3.65168e-05	0.000109669	9.01705e-06	0.000164796	3.15048e-05	6.55057e-05	4.28459e-05	9.32698e-06	3.51223e-05	1.77834e-05	2.55692e-05	0.000311879	2.19622e-05	0.000169553	5.64164e-05	8.4977e-05	1.03633e-05	3.82368e-05	8.58953e-05	0.000463946	3.04663e-05	0	2.79175e-05	7.94558e-06	5.38676e-05	8.2927e-05	0.000112027	2.99759e-05	1.71583e-05	2.99502e-05
Mortsel	0.000700617	0.0185136	9.69053e-06	2.83947e-06	1.47769e-05	2.76116e-05	7.94622e-05	0.00250119	8.11507e-05	0.000303166	0.000128613	0.00107616	0.000312992	8.2004e-05	7.1126e-06	0.000362223	0.023947	2.78049e-05	4.70633e-05	4.55154e-05	0.000146468	0.000279973	6.50395e-05	3.22601e-05	2.20952e-05	3.06889e-05	0.00358064	2.55524e-05	5.22931e-05	0.000164128	2.26592e-05	0.0022808	1.64594e-05	0.000703107	3.63873e-05	0.000473601	4.67818e-05	0.000565982	8.71226e-06	1.08926e-05	2.79175e-05	0	0.000162779	0.000160124	2.49791e-05	1.36617e-05	9.12884e-05	0.000180398	0.000448026
Niel	0.000471871	0.00200618	2.66532e-06	7.29222e-07	4.34999e-06	6.45868e-06	1.49345e-05	5.83917e-05	3.11265e-05	0.00109798	0.000330727	3.55975e-05	4.80552e-05	1.67237e-05	1.99574e-06	7.63927e-05	0.000170734	7.56133e-06	1.25691e-05	8.51352e-06	3.64835e-05	0.000533849	1.47157e-05	6.82915e-06	6.31565e-06	7.33786e-06	4.76391e-05	6.65472e-06	1.21294e-05	3.17222e-05	5.75891e-06	0.000205961	4.78906e-06	8.69556e-05	7.9151e-06	4.30391e-05	9.09256e-06	0.000299971	2.50702e-06	2.65398e-06	7.94558e-06	0.000162779	0	2.59634e-05	6.06797e-06	3.54359e-06	2.47616e-05	0.000634671	3.74064e-05
Nijlen	5.15405e-05	0.00191156	1.65078e-05	4.18942e-06	2.67494e-05	5.47948e-05	0.000695564	0.000123733	6.93133e-05	5.38701e-05	3.25737e-05	8.61525e-05	0.00015004	9.38973e-05	1.3275e-05	0.00014064	0.000128884	2.01051e-05	0.000117183	0.00050495	0.000572402	3.08724e-05	0.000307799	0.000316472	5.64093e-05	4.08624e-05	6.0985e-05	9.15282e-05	3.36652e-05	6.93374e-05	5.32377e-05	0.000120011	3.62381e-05	0.000882056	0.000121309	7.68403e-05	9.11607e-05	0.000304924	1.79407e-05	1.83826e-05	5.38676e-05	0.000160124	2.59634e-05	0	0.000100297	2.52552e-05	0.000170536	4.64677e-05	0.000430138
Olen	1.03442e-05	0.000375097	1.63205e-05	2.63872e-06	3.74529e-05	3.72622e-05	4.41697e-05	1.58003e-05	1.78836e-05	1.21468e-05	8.89464e-06	1.19628e-05	3.229e-05	3.01361e-05	1.76444e-05	2.19704e-05	2.07434e-05	7.35578e-06	0.000364501	8.57861e-05	0.000235928	6.87491e-06	0.00131458	0.000134729	0.000105158	1.94303e-05	8.76599e-06	9.88582e-05	1.03208e-05	1.71512e-05	8.56118e-05	1.99394e-05	7.94415e-05	6.99093e-05	0.000103206	1.04702e-05	3.00666e-05	7.67552e-05	3.44287e-05	1.17786e-05	8.2927e-05	2.49791e-05	6.06797e-06	0.000100297	0	2.38682e-05	3.96929e-05	1.23743e-05	3.35012e-05
Oud-Turnhout	5.81678e-06	0.000257509	0.000244831	1.90501e-05	4.39228e-05	0.000189895	9.93064e-06	7.79867e-06	6.49015e-06	6.55817e-06	5.67251e-06	6.83982e-06	2.81346e-05	4.35106e-05	5.09798e-05	8.94378e-06	1.11387e-05	1.0757e-05	0.000120248	1.92059e-05	3.53596e-05	4.21509e-06	6.73052e-05	1.21423e-05	1.34408e-05	5.78699e-05	4.45613e-06	9.8399e-06	1.26348e-05	1.61294e-05	0.00021055	1.00536e-05	1.93616e-05	2.50922e-05	7.19188e-05	4.66316e-06	3.7067e-05	3.26321e-05	1.87495e-05	8.59367e-05	0.000112027	1.36617e-05	3.54359e-06	2.52552e-05	2.38682e-05	0	1.05491e-05	7.34292e-06	1.57666e-05
Putte	4.28632e-05	0.000969225	7.88e-06	1.72093e-06	1.619e-05	1.82165e-05	0.000240003	6.32357e-05	0.000354329	5.89328e-05	3.12544e-05	3.40253e-05	5.35944e-05	3.01586e-05	6.89779e-06	0.000203976	8.18311e-05	9.48165e-06	5.85588e-05	4.39074e-05	0.000945451	2.47254e-05	8.2528e-05	6.08897e-05	5.32135e-05	1.52323e-05	3.63532e-05	9.15118e-05	1.4554e-05	2.93122e-05	2.15312e-05	9.67091e-05	2.61489e-05	0.000435359	2.99727e-05	6.13147e-05	2.24114e-05	0.000764793	1.10136e-05	6.77579e-06	2.99759e-05	9.12884e-05	2.47616e-05	0.000170536	3.96929e-05	1.05491e-05	0	4.99775e-05	8.49042e-05
Puurs	0.000255814	0.00258418	5.64948e-06	1.49218e-06	9.52378e-06	1.28764e-05	2.74526e-05	7.44944e-05	6.8167e-05	0.000795422	0.00211835	4.75906e-05	7.93363e-05	3.11884e-05	4.27915e-06	0.000118265	0.00017784	1.50176e-05	2.65291e-05	1.59324e-05	7.40179e-05	0.000254486	2.92746e-05	1.32556e-05	1.36681e-05	1.45369e-05	5.57085e-05	1.38319e-05	2.25689e-05	5.3871e-05	1.19005e-05	0.000209907	1.04594e-05	0.000139263	1.54978e-05	5.71185e-05	1.70032e-05	0.000693469	5.44775e-06	5.34585e-06	1.71583e-05	0.000180398	0.000634671	4.64677e-05	1.23743e-05	7.34292e-06	4.99775e-05	0	5.7962e-05
Ranst	8.90559e-05	0.00448795	1.04728e-05	3.13725e-06	1.5269e-05	3.55971e-05	0.000130659	0.000426351	5.18178e-05	7.39311e-05	4.18338e-05	0.000414069	0.000297858	0.000102331	7.6881e-06	0.00016818	0.000316774	2.28538e-05	5.5185e-05	9.47026e-05	0.000176059	5.05469e-05	9.67534e-05	5.2611e-05	2.3897e-05	3.49244e-05	0.000167618	3.03506e-05	4.4448e-05	0.000118663	2.77222e-05	0.000231864	1.75158e-05	0.00102926	5.55471e-05	0.000144193	7.43543e-05	0.000280082	9.33096e-06	1.30315e-05	2.99502e-05	0.000448026	3.74064e-05	0.000430138	3.35012e-05	1.57666e-05	8.49042e-05	5.7962e-05	0
Ravels	5.43679e-06	0.000247157	0.000175529	4.39502e-05	3.1791e-05	0.000131669	8.0944e-06	7.00718e-06	5.68519e-06	6.10612e-06	5.45866e-06	6.29549e-06	2.7675e-05	4.5133e-05	3.04041e-05	7.92885e-06	1.0262e-05	1.25377e-05	7.15815e-05	1.43168e-05	2.80389e-05	4.00689e-06	4.40663e-05	9.05231e-06	1.01715e-05	7.45891e-05	4.05868e-06	7.54855e-06	1.37036e-05	1.63879e-05	8.11786e-05	9.19105e-06	1.40366e-05	2.16272e-05	4.4289e-05	4.17144e-06	3.24882e-05	2.92637e-05	5.38682e-05	9.98974e-05	7.20999e-05	1.25977e-05	3.34632e-06	2.02841e-05	1.60231e-05	0.000372367	8.87075e-06	6.97118e-06	1.38466e-05
Retie	4.02528e-06	0.000164513	0.000244287	4.97639e-06	0.000104323	4.4942e-05	7.26521e-06	5.22177e-06	5.066e-06	4.69245e-06	4.05123e-06	4.38236e-06	1.61409e-05	2.02803e-05	0.000468715	6.45396e-06	7.51136e-06	5.92376e-06	0.000173067	1.22113e-05	2.89641e-05	2.90041e-06	5.018e-05	9.11139e-06	1.35657e-05	2.12112e-05	3.0055e-06	8.62467e-06	6.92738e-06	9.41176e-06	0.000185289	6.95182e-06	2.47374e-05	1.74899e-05	3.55891e-05	3.24456e-06	1.64043e-05	2.49095e-05	3.30591e-05	1.84692e-05	0.000355738	9.11051e-06	2.50171e-06	1.70485e-05	2.10809e-05	0.00012208	8.30352e-06	5.31239e-06	1.00321e-05
Rijkevorsel	8.79857e-06	0.000480434	1.97688e-05	1.75091e-05	1.42647e-05	0.000267163	1.24968e-05	1.28587e-05	7.46807e-06	9.12337e-06	7.80525e-06	1.27809e-05	7.45573e-05	0.000309617	9.66044e-06	1.22319e-05	1.80452e-05	2.47455e-05	4.63771e-05	2.73307e-05	3.52433e-05	6.41817e-06	5.51392e-05	1.29243e-05	9.50226e-06	0.000478664	7.21286e-06	8.54167e-06	3.50857e-05	3.89576e-05	4.13537e-05	1.52657e-05	1.02504e-05	3.67353e-05	7.95498e-05	6.96098e-06	0.00028593	3.93652e-05	7.33807e-06	0.000120093	3.06532e-05	2.28362e-05	5.07305e-06	3.68389e-05	1.69151e-05	4.21899e-05	1.17859e-05	9.86195e-06	2.94497e-05
Rumst	0.000335214	0.0020423	4.3875e-06	1.13392e-06	7.58202e-06	1.06129e-05	3.7904e-05	0.000126525	0.000118434	0.00124898	0.000126203	5.59578e-05	6.31661e-05	2.46449e-05	3.41436e-06	0.000422294	0.000288572	9.66562e-06	2.30501e-05	1.67469e-05	8.79538e-05	0.000130317	2.84317e-05	1.4596e-05	1.30241e-05	1.10717e-05	0.000100373	1.47849e-05	1.54047e-05	3.78614e-05	1.00751e-05	0.000572516	9.09544e-06	0.000249021	1.41015e-05	0.00015359	1.4758e-05	0.00152357	4.53895e-06	4.23291e-06	1.38827e-05	0.000259356	0.000203963	5.69141e-05	1.19873e-05	5.85715e-06	7.42483e-05	0.000278381	7.33971e-05
Schelle	0.000698911	0.00216389	2.24192e-06	6.24533e-07	3.59513e-06	5.55339e-06	1.25813e-05	5.69774e-05	2.35549e-05	0.000529941	0.000199866	3.57508e-05	4.53943e-05	1.48993e-05	1.66536e-06	6.29872e-05	0.000184553	6.67413e-06	1.04646e-05	7.34135e-06	2.99056e-05	0.00142552	1.24386e-05	5.76047e-06	5.14608e-06	6.37977e-06	4.79713e-05	5.455e-06	1.09834e-05	2.99428e-05	4.83385e-06	0.000204371	3.92528e-06	7.58574e-05	6.78959e-06	3.88854e-05	8.01063e-06	0.00021402	2.06978e-06	2.28038e-06	6.59731e-06	0.000174465	0.00180698	2.24792e-05	5.07547e-06	3.00402e-06	1.98201e-05	0.000294853	3.45845e-05
Schilde	5.4232e-05	0.00395418	1.27472e-05	4.46467e-06	1.62411e-05	5.24727e-05	6.67832e-05	0.000134955	3.12675e-05	4.67192e-05	3.23339e-05	0.000191045	0.000660577	0.000224793	8.69327e-06	7.56899e-05	0.000151937	3.38939e-05	5.78522e-05	9.58055e-05	0.000120361	3.54704e-05	9.91385e-05	4.16873e-05	2.04454e-05	5.6935e-05	6.63765e-05	2.34551e-05	7.52807e-05	0.000194789	3.28318e-05	0.000110714	1.66643e-05	0.000302462	7.3537e-05	5.42206e-05	0.000160058	0.000171295	9.54769e-06	1.91629e-05	3.24892e-05	0.000212107	2.55396e-05	0.00024502	3.18356e-05	2.02514e-05	4.95705e-05	4.21147e-05	0.000698284
Schoten	0.000129247	0.018242	1.68014e-05	5.99197e-06	2.16455e-05	5.9668e-05	7.26244e-05	0.000266041	4.85528e-05	9.89294e-05	7.30188e-05	0.000583629	0.00427451	0.000303741	1.12991e-05	0.000123743	0.000366346	7.06117e-05	6.99492e-05	7.67639e-05	0.000144337	9.06029e-05	0.000100739	4.16565e-05	2.58452e-05	7.73836e-05	0.000142709	2.81229e-05	0.000184268	0.000844632	3.86235e-05	0.000232991	2.14309e-05	0.000383674	7.08659e-05	9.48276e-05	0.000140666	0.000290396	1.23212e-05	2.36889e-05	4.22024e-05	0.000541112	5.84488e-05	0.000204395	3.50579e-05	2.53432e-05	6.68564e-05	9.04875e-05	0.000606471
Sint-Katelijne-Waver	0.000116108	0.00182144	7.66686e-06	1.84181e-06	1.42388e-05	1.85323e-05	0.000143399	0.000151927	0.000788854	0.000176356	6.57626e-05	6.51372e-05	7.92459e-05	3.6885e-05	6.28392e-06	0.00173457	0.000209805	1.24753e-05	4.72192e-05	3.79305e-05	0.000305612	5.79978e-05	6.36725e-05	3.91353e-05	3.2041e-05	1.72696e-05	9.44128e-05	4.26628e-05	1.95488e-05	4.40469e-05	1.92612e-05	0.000307964	1.94432e-05	0.000834156	2.76545e-05	0.000218065	2.49518e-05	0.00308556	9.04069e-06	7.1045e-06	2.62881e-05	0.000216901	6.27337e-05	0.000150918	2.79174e-05	1.0316e-05	0.000477265	0.000115343	0.000131243
Stabroek	3.47925e-05	0.00379739	6.35223e-06	2.43556e-06	7.79115e-06	1.88737e-05	1.40857e-05	3.57232e-05	1.32236e-05	3.05832e-05	3.28473e-05	4.42528e-05	0.000493151	9.89025e-05	4.0413e-06	2.63827e-05	6.40905e-05	8.14827e-05	2.17061e-05	1.46713e-05	3.50773e-05	3.1047e-05	2.48788e-05	9.09574e-06	7.57999e-06	3.17754e-05	2.21381e-05	7.31651e-06	0.000255168	0.00131952	1.21593e-05	4.75618e-05	6.86095e-06	6.21204e-05	1.78036e-05	1.6985e-05	3.19892e-05	8.37131e-05	4.13647e-06	8.46819e-06	1.47612e-05	8.33084e-05	2.02128e-05	3.37703e-05	9.2154e-06	9.00098e-06	1.62375e-05	3.57555e-05	5.19599e-05
Turnhout	2.08596e-05	0.000945424	0.000406202	8.27675e-05	0.000118868	0.00125433	3.57963e-05	2.84889e-05	2.25863e-05	2.32355e-05	1.99635e-05	2.53394e-05	0.000107351	0.000179308	0.000119467	3.19396e-05	4.04448e-05	3.99548e-05	0.000364495	7.35894e-05	0.000123113	1.50802e-05	0.000245497	4.38869e-05	4.41471e-05	0.000252499	1.62166e-05	3.36917e-05	4.79462e-05	6.06221e-05	0.000632473	3.62121e-05	6.0024e-05	9.1193e-05	0.000307353	1.68389e-05	0.000162204	0.000113897	5.43547e-05	0.000519931	0.000294393	4.98093e-05	1.25828e-05	9.38294e-05	8.24073e-05	0.00520347	3.68876e-05	2.58071e-05	5.90688e-05
Vorselaar	9.12369e-06	0.000385991	1.01761e-05	2.45082e-06	1.44043e-05	4.47204e-05	3.77381e-05	1.63005e-05	1.14977e-05	9.83716e-06	7.03947e-06	1.34969e-05	3.94073e-05	4.06875e-05	8.13676e-06	1.82111e-05	2.00954e-05	7.18974e-06	8.21485e-05	0.000656273	0.000101486	6.00452e-06	0.000543277	9.10544e-05	2.10976e-05	2.17995e-05	8.67644e-06	2.537e-05	1.11483e-05	1.89396e-05	4.63865e-05	1.81677e-05	1.74264e-05	6.92177e-05	0.000258111	9.6982e-06	5.74736e-05	5.30021e-05	9.88822e-06	1.23784e-05	3.17474e-05	2.49869e-05	5.01862e-06	0.000156817	7.81544e-05	1.78367e-05	2.39242e-05	9.60481e-06	4.50234e-05
Vosselaar	6.35642e-06	0.0002956	5.1251e-05	1.75513e-05	2.57659e-05	0.00162052	1.15816e-05	9.07002e-06	6.73201e-06	6.96482e-06	5.84819e-06	8.17034e-06	3.51181e-05	6.36763e-05	2.22203e-05	9.86731e-06	1.2637e-05	1.1603e-05	9.53946e-05	2.74531e-05	3.79705e-05	4.55037e-06	8.62638e-05	1.46939e-05	1.25511e-05	8.17883e-05	5.10631e-06	1.02018e-05	1.48348e-05	1.91017e-05	0.000157136	1.12159e-05	1.57552e-05	2.93009e-05	0.000153406	5.27708e-06	7.08275e-05	3.38219e-05	1.3063e-05	0.000179546	6.25488e-05	1.56582e-05	3.76149e-06	3.21826e-05	2.6104e-05	0.000220354	1.12371e-05	7.58162e-06	1.98098e-05
Westerlo	1.62731e-05	0.000547833	2.58728e-05	3.64891e-06	9.10987e-05	4.2514e-05	5.49618e-05	2.23995e-05	3.27461e-05	2.01023e-05	1.51551e-05	1.64612e-05	4.36033e-05	3.81306e-05	3.23808e-05	3.42442e-05	3.0728e-05	1.09807e-05	0.000660427	6.21472e-05	0.000386367	1.09612e-05	0.000353381	9.19729e-05	0.000941199	2.5654e-05	1.27586e-05	0.000207044	1.47005e-05	2.43056e-05	0.000100535	3.03822e-05	0.000593076	9.52884e-05	7.96013e-05	1.54938e-05	3.2876e-05	0.000137456	0.000106966	1.48948e-05	0.000178515	3.64378e-05	9.97739e-06	0.000101069	0.000389297	3.24393e-05	6.8717e-05	2.12549e-05	4.17127e-05
Wijnegem	4.63382e-05	0.00493449	5.00527e-06	1.67577e-06	6.74011e-06	1.75e-05	2.95628e-05	0.000135873	1.78483e-05	3.46836e-05	2.2884e-05	0.000387609	0.000446964	7.20322e-05	3.46951e-06	5.0592e-05	0.000154865	1.6427e-05	2.25373e-05	2.83111e-05	5.32943e-05	2.97115e-05	3.44547e-05	1.54038e-05	8.79082e-06	2.04805e-05	6.5978e-05	1.00082e-05	3.75658e-05	0.00013416	1.2053e-05	9.5102e-05	7.0058e-06	0.000177666	2.28125e-05	4.19053e-05	4.01977e-05	0.000105173	3.92468e-06	6.75174e-06	1.31466e-05	0.000238806	1.95701e-05	8.57796e-05	1.19841e-05	7.54075e-06	2.53585e-05	2.94947e-05	0.000421317
Willebroek	0.000341376	0.00268086	6.55027e-06	1.68213e-06	1.13953e-05	1.50704e-05	4.10445e-05	0.000108252	0.000133507	0.0023244	0.000429543	5.97641e-05	8.59393e-05	3.47797e-05	5.07413e-06	0.000238923	0.000248406	1.51539e-05	3.28892e-05	2.0836e-05	0.000107987	0.000214513	3.76607e-05	1.80831e-05	1.81881e-05	1.62056e-05	8.17771e-05	1.92591e-05	2.313e-05	5.48468e-05	1.43793e-05	0.000352537	1.32201e-05	0.000220366	1.90671e-05	9.88611e-05	1.99972e-05	0.00176362	6.68381e-06	6.13623e-06	2.05942e-05	0.000241383	0.0005041	6.45787e-05	1.60898e-05	8.56587e-06	8.2387e-05	0.00158966	7.77388e-05
Wommelgem	7.70852e-05	0.00583642	6.32327e-06	1.99144e-06	8.94412e-06	2.11125e-05	5.12805e-05	0.00036536	2.94733e-05	5.61777e-05	3.30361e-05	0.00118378	0.000316131	7.25104e-05	4.51563e-06	9.64071e-05	0.00031207	1.77112e-05	3.04435e-05	4.03826e-05	8.38986e-05	4.49633e-05	4.77929e-05	2.32418e-05	1.27187e-05	2.3063e-05	0.000151729	1.50851e-05	3.70111e-05	0.000117891	1.56368e-05	0.000184572	9.73461e-06	0.000381158	2.92725e-05	8.99022e-05	4.44819e-05	0.000172958	5.30658e-06	8.0351e-06	1.73838e-05	0.000500308	3.02858e-05	0.000142936	1.69133e-05	9.41252e-06	4.22938e-05	4.4161e-05	0.00133736
Wuustwezel	1.8411e-05	0.00125908	1.455e-05	8.86776e-06	1.35767e-05	6.2017e-05	1.61682e-05	2.44961e-05	1.17041e-05	1.80865e-05	1.6822e-05	2.72017e-05	0.000283911	0.00127107	7.95971e-06	2.07489e-05	3.69347e-05	0.000170984	3.8773e-05	2.46458e-05	4.27402e-05	1.42643e-05	4.40885e-05	1.32167e-05	1.04578e-05	0.000214649	1.41163e-05	9.64761e-06	0.000356426	0.000178629	2.63187e-05	2.96881e-05	1.04602e-05	5.7256e-05	4.13183e-05	1.24466e-05	0.00012035	6.64029e-05	6.93317e-06	3.10915e-05	2.70094e-05	4.74577e-05	1.06393e-05	4.40291e-05	1.50658e-05	2.32505e-05	1.65943e-05	2.02099e-05	4.96267e-05
Zandhoven	2.62086e-05	0.00130605	1.07837e-05	3.30769e-06	1.44599e-05	4.72157e-05	8.0947e-05	6.12023e-05	2.3545e-05	2.53812e-05	1.70025e-05	5.75524e-05	0.000146853	0.000104504	7.80466e-06	4.96547e-05	6.70538e-05	1.6047e-05	6.00604e-05	0.000267353	0.000133287	1.66577e-05	0.000143908	6.60633e-05	2.08342e-05	3.68555e-05	3.02864e-05	2.62306e-05	2.93761e-05	5.95367e-05	3.34381e-05	5.5921e-05	1.62182e-05	0.000235018	9.94163e-05	3.08649e-05	0.000127399	0.000116419	9.03781e-06	1.04739e-05	2.97727e-05	8.74148e-05	1.30989e-05	0.000514729	4.03561e-05	1.7765e-05	4.46552e-05	2.30397e-05	0.000295287
Zoersel	2.68212e-05	0.00144816	2.61472e-05	1.01703e-05	2.75351e-05	0.000195981	5.4214e-05	4.79456e-05	2.35336e-05	2.68697e-05	2.04799e-05	4.78397e-05	0.000215983	0.000367567	1.66602e-05	4.25049e-05	6.08579e-05	3.3749e-05	0.000111631	0.000198134	0.000127974	1.8388e-05	0.000224166	5.90109e-05	2.77049e-05	0.000129733	2.55594e-05	2.91294e-05	5.90584e-05	9.31116e-05	8.09248e-05	5.08867e-05	2.56109e-05	0.000152227	0.00033825	2.50627e-05	0.00181055	0.000119745	1.61594e-05	5.54634e-05	5.89742e-05	7.82884e-05	1.44496e-05	0.000208192	5.83036e-05	4.94349e-05	4.08829e-05	2.67596e-05	0.000145023
Zwijndrecht	0.000158742	0.0216486	5.46633e-06	1.73277e-06	7.79734e-06	1.47634e-05	2.09191e-05	8.98538e-05	2.50438e-05	0.000105042	0.000116074	0.000101173	0.000233525	5.16282e-05	3.80013e-06	5.97166e-05	0.000225817	2.65873e-05	2.2372e-05	1.8714e-05	4.91205e-05	0.0001973	2.66396e-05	1.11645e-05	9.34257e-06	1.94465e-05	6.42949e-05	9.53888e-06	5.08845e-05	0.000193341	1.13069e-05	0.000152848	7.72216e-06	0.000113243	1.6437e-05	4.17453e-05	2.34573e-05	0.000179737	4.33105e-06	6.24059e-06	1.45268e-05	0.000283941	8.57442e-05	4.44257e-05	1.03107e-05	7.51782e-06	2.67836e-05	0.000115617	7.95388e-05
[truncated: 21 more columns]

## Sheet: Entropy Matrix
Gemeente	Aartselaar	Antwerpen	Arendonk	Baarle-Hertog	Balen	Beerse	Berlaar	Boechout	Bonheiden	Boom	Bornem	Borsbeek	Brasschaat	Brecht	Dessel	Duffel	Edegem	Essen	Geel	Grobbendonk	Heist-op-den-Berg	Hemiksem	Herentals	Herenthout	Herselt	Hoogstraten	Hove (Antwerpen)	Hulshout	Kalmthout	Kapellen	Kasterlee	Kontich	Laakdal	Lier	Lille	Lint	Malle	Mechelen	Meerhout	Merksplas	Mol	Mortsel	Niel	Nijlen	Olen	Oud-Turnhout	Putte	Puurs	Ranst
1. Aartselaar	0	0.00766823	5.01654e-05	1.62513e-05	7.54249e-05	0.000114108	0.000258873	0.00120847	0.000398575	0.00316891	0.00106189	0.00073371	0.000692795	0.000266829	3.87119e-05	0.00110933	0.00355012	0.000124585	0.000194393	0.000156286	0.00049491	0.00340473	0.000234671	0.000125781	0.000106568	0.000126192	0.00118035	0.000115731	0.000196812	0.000468562	0.000100957	0.00402966	8.28012e-05	0.00123614	0.00013947	0.00088845	0.000161768	0.00214711	4.7078e-05	5.19447e-05	0.000128352	0.00306029	0.00233021	0.000419171	0.000108095	6.56148e-05	0.00036	0.00148923	0.000654012
2. Antwerpen	0.0270961	0	0.00184664	0.000691601	0.00247004	0.00458659	0.00672109	0.0277114	0.00666665	0.0179373	0.0145619	0.0407944	0.0501416	0.013384	0.00135181	0.0150804	0.0505098	0.00637207	0.00623778	0.00548872	0.0123344	0.0235308	0.00768221	0.0038507	0.00299285	0.0056147	0.0209703	0.00315944	0.0117683	0.0364984	0.00357672	0.032725	0.00249976	0.0272611	0.00522292	0.0127512	0.00733662	0.0295867	0.00151699	0.00216588	0.00422718	0.0645891	0.013431	0.0129308	0.0034186	0.00248665	0.00750602	0.0163567	0.0248327
3. Arendonk	3.94328e-05	0.000691897	0	7.41788e-05	0.00031218	0.000319203	5.89151e-05	4.84786e-05	4.47396e-05	4.44445e-05	4.00993e-05	4.27232e-05	0.000131915	0.000168199	0.00042034	5.62178e-05	6.62231e-05	6.3994e-05	0.000456234	8.987e-05	0.000171888	3.02144e-05	0.000244942	6.71467e-05	8.55998e-05	0.000195758	3.05125e-05	6.21144e-05	7.02549e-05	8.6495e-05	0.000485296	6.15047e-05	0.000125044	0.000126009	0.000210076	3.19841e-05	0.00013481	0.000166916	0.000134322	0.000187333	0.000588691	7.78711e-05	2.63815e-05	0.000119967	0.000118874	0.000826729	6.56733e-05	4.97959e-05	8.29842e-05
4. Baarle-Hertog	1.07182e-05	0.000195312	5.49209e-05	0	2.77141e-05	0.000136762	1.37357e-05	1.34067e-05	1.01668e-05	1.15526e-05	1.06162e-05	1.26317e-05	4.6213e-05	7.97853e-05	2.25114e-05	1.40652e-05	1.83469e-05	2.73754e-05	5.70485e-05	2.21936e-05	3.5452e-05	8.36173e-06	4.77192e-05	1.43046e-05	1.41649e-05	0.0001678	8.43107e-06	1.17066e-05	2.88064e-05	3.07138e-05	5.60253e-05	1.64686e-05	1.69338e-05	3.2046e-05	5.14449e-05	8.40954e-06	5.59106e-05	3.93226e-05	1.42674e-05	0.000178806	5.0551e-05	2.18593e-05	7.04398e-06	2.9901e-05	2.0593e-05	9.43416e-05	1.44917e-05	1.28724e-05	2.37004e-05
5. Balen	6.52974e-05	0.00110875	0.000370537	3.96498e-05	0	0.000243372	0.00010976	7.84744e-05	8.95737e-05	7.69807e-05	6.78734e-05	6.50286e-05	0.000176113	0.0001829	0.000869938	0.000100807	0.000107542	7.31541e-05	0.00138908	0.000141355	0.000373737	4.91812e-05	0.000445172	0.000128496	0.000258034	0.00016396	4.95014e-05	0.000149311	8.40438e-05	0.000114501	0.00057099	0.000103237	0.000565331	0.000219481	0.000258438	5.43639e-05	0.000146654	0.000322085	0.00110956	0.000116423	0.00261181	0.000124888	4.44388e-05	0.000203173	0.000266284	0.000302187	0.000134698	8.65265e-05	0.000128325
6. Beerse	0.000103393	0.00201964	0.000409348	0.00025633	0.000260471	0	0.000164356	0.000140981	0.000103449	0.000110253	9.51608e-05	0.000131854	0.000456338	0.000808055	0.000214173	0.000146753	0.000185558	0.000184466	0.000713741	0.000338982	0.000415042	7.79934e-05	0.000738224	0.000192928	0.000159168	0.00102938	8.66079e-05	0.000138254	0.000230265	0.000277168	0.000862789	0.000166348	0.000183476	0.000361012	0.0011826	8.78316e-05	0.000930558	0.000394278	0.000149917	0.00191965	0.000510431	0.000222565	6.55979e-05	0.000387498	0.000284241	0.0010024	0.000157766	0.000117962	0.000273888
7. Berlaar	0.000221426	0.00236825	6.72835e-05	1.90904e-05	0.000112115	0.000158143	0	0.000407052	0.000415477	0.00024639	0.000152851	0.000262781	0.000368979	0.000239612	5.83183e-05	0.000638785	0.0004335	7.79262e-05	0.00035779	0.000522371	0.00211669	0.000140822	0.000621432	0.000698868	0.00026038	0.000128862	0.000240078	0.000447296	0.000115099	0.000204414	0.000171123	0.000447105	0.000158644	0.00209224	0.000271487	0.000337504	0.000208912	0.00110455	8.16772e-05	6.57883e-05	0.00019463	0.000493526	0.000128772	0.00214302	0.000311751	9.14724e-05	0.00110788	0.000212597	0.000717755
8. Boechout	0.00128886	0.00983215	6.44645e-05	2.12886e-05	9.45661e-05	0.000163054	0.000513068	0	0.000435447	0.000893349	0.000436501	0.00275399	0.00104311	0.000388332	4.98088e-05	0.00171868	0.0059775	0.000141784	0.000265113	0.000287353	0.000754939	0.000650743	0.000367371	0.000215692	0.000142617	0.000170089	0.00769018	0.000169044	0.00024034	0.000584455	0.000140232	0.00404898	0.000107291	0.00356328	0.000217994	0.00280623	0.000259309	0.00191366	6.06664e-05	7.13279e-05	0.000164963	0.00736784	0.000488531	0.000901151	0.000161988	8.7898e-05	0.000521787	0.000597078	0.00234418
9. Bonheiden	0.000357125	0.00272774	5.29588e-05	1.44002e-05	9.58128e-05	0.000104747	0.000443623	0.000370962	0	0.000545266	0.000297289	0.000215949	0.000303005	0.000174363	4.58028e-05	0.00116749	0.000513241	7.32327e-05	0.000252677	0.000173682	0.00109172	0.000224913	0.000295988	0.000189367	0.00020349	9.74186e-05	0.00025435	0.000244365	0.000102753	0.000192993	0.000114486	0.000636616	0.000129771	0.00118249	0.000144098	0.000395202	0.000125168	0.00418809	6.53858e-05	4.64268e-05	0.00015794	0.000537461	0.000249182	0.000474829	0.000157465	6.66361e-05	0.00159327	0.000468616	0.000376723
10. Boom	0.00318634	0.00680471	5.6933e-05	1.76347e-05	8.94766e-05	0.000122094	0.000289897	0.000845609	0.000617889	0	0.00171391	0.000502869	0.000595457	0.000263706	4.49119e-05	0.00133969	0.0018209	0.000126275	0.000225513	0.000164992	0.000598551	0.00185278	0.000261464	0.000141284	0.000131561	0.000131663	0.000721896	0.000140896	0.000187996	0.00040869	0.000113634	0.00250251	0.000100543	0.00124164	0.000149787	0.000781219	0.000162271	0.00366197	5.61774e-05	5.58049e-05	0.000150239	0.00169777	0.00411025	0.000435953	0.000124402	7.29977e-05	0.000469287	0.00334755	0.000564537
11. Bornem	0.000928402	0.0042026	4.75029e-05	1.51243e-05	7.26719e-05	9.67657e-05	0.000161765	0.000374017	0.000298948	0.00145732	0	0.00028073	0.000462093	0.000211129	3.67058e-05	0.000472661	0.000744419	0.000121718	0.00017049	0.000109503	0.00036561	0.00112813	0.000182927	9.11431e-05	9.32984e-05	0.00011072	0.000293081	9.26254e-05	0.000170704	0.000352038	8.83236e-05	0.000778357	7.62834e-05	0.000592002	0.000110177	0.000279137	0.000123008	0.00159329	4.42514e-05	4.59261e-05	0.000120068	0.000771882	0.00153423	0.000260031	8.76613e-05	5.95867e-05	0.000251363	0.00415141	0.000318851
12. Borsbeek	0.00075701	0.00819734	5.55939e-05	1.96966e-05	7.66465e-05	0.000149483	0.000317151	0.00265455	0.000244237	0.000515889	0.000317885	0	0.00144987	0.00041728	4.14606e-05	0.00070001	0.00271288	0.00014621	0.000213154	0.000235137	0.000504814	0.000471348	0.000294482	0.000158383	0.000103858	0.000165897	0.0014965	0.000118084	0.000270184	0.000746657	0.000118448	0.00150596	8.22819e-05	0.00167664	0.000190477	0.000725686	0.000260679	0.00109655	4.81286e-05	6.60431e-05	0.000134841	0.0042782	0.000316583	0.000656334	0.00012521	7.71063e-05	0.000304818	0.000403307	0.00221667
13. Brasschaat	0.000783351	0.0145226	0.000196135	8.67757e-05	0.000230636	0.000585623	0.000491623	0.00112228	0.000374264	0.00066832	0.000578933	0.00161898	0	0.002803	0.000133759	0.000734551	0.00156769	0.00092592	0.000600359	0.000562891	0.000947022	0.000626155	0.000763376	0.000336934	0.000242729	0.000831114	0.000705896	0.000249119	0.00250871	0.00957042	0.000378189	0.00116933	0.000216129	0.00170918	0.000606107	0.00054435	0.00118751	0.0016306	0.000137931	0.000279014	0.000407495	0.00202721	0.000441158	0.00113095	0.000314952	0.000280012	0.000483574	0.000670943	0.00195049
14. Brecht	0.000247732	0.00443081	0.000215478	0.000139798	0.000202769	0.000855468	0.000260586	0.000341727	0.000178743	0.00024424	0.000215525	0.000374395	0.0020459	0	0.000131912	0.000292767	0.000455543	0.000721975	0.000511964	0.000416624	0.000553633	0.000193944	0.000619246	0.000229349	0.000170674	0.00175736	0.000212556	0.000163966	0.00127949	0.00122686	0.000388051	0.000381543	0.000168435	0.000700085	0.000643079	0.000193498	0.00209467	0.000712052	0.000118345	0.000455067	0.000363864	0.000559647	0.000152494	0.000622468	0.00024919	0.000336727	0.000249344	0.000256347	0.00066568
Dessel	3.10984e-05	0.000562876	0.000430568	2.90687e-05	0.000707503	0.000176847	5.19356e-05	3.83704e-05	3.93518e-05	3.58298e-05	3.15871e-05	3.26382e-05	9.38764e-05	0.000107251	0	4.6999e-05	5.2262e-05	4.01588e-05	0.000686714	7.57865e-05	0.00016617	2.34635e-05	0.000239648	6.26055e-05	9.7375e-05	0.000105312	2.40321e-05	6.34714e-05	4.59167e-05	6.04488e-05	0.000499202	4.93577e-05	0.000173477	0.000105887	0.000164592	2.59048e-05	8.88872e-05	0.000144986	0.000254359	8.59346e-05	0.00143695	6.11745e-05	2.08242e-05	0.000102225	0.000128629	0.000293612	5.96321e-05	3.99412e-05	6.52613e-05
Duffel	0.00108905	0.0058631	7.18428e-05	2.15352e-05	0.000116427	0.000161053	0.000770663	0.00156915	0.00133528	0.00130867	0.000520208	0.00066799	0.000640468	0.00031189	5.87944e-05	0	0.0019145	0.000123411	0.000319864	0.000292889	0.00119848	0.000557985	0.000420331	0.000272606	0.000208699	0.00015675	0.00112562	0.00025882	0.000187651	0.000391291	0.000157106	0.00286458	0.000144249	0.00413125	0.000222292	0.0030575	0.000219871	0.00467288	0.00109075	7.07678e-05	0.000197835	0.0018847	0.000569013	0.000923725	0.000203147	9.42944e-05	0.00123031	0.000806332	0.00106122
Edegem	0.00522603	0.0264383	0.000101375	3.3295e-05	0.000149414	0.000249356	0.000648834	0.00853445	0.000724645	0.00244895	0.00107799	0.00363467	0.00178462	0.000616677	7.75731e-05	0.00266398	0	0.00024891	0.00040819	0.000384372	0.00110185	0.00215163	0.000532407	0.000293161	0.000216355	0.000271214	0.0138439	0.000245878	0.00042038	0.00107472	0.000213783	0.0149117	0.000165779	0.00390416	0.000317694	0.00339523	0.00038363	0.00366864	9.38398e-05	0.000110272	0.000259969	0.0282802	0.00141929	0.00112368	0.000235519	0.00013646	0.000767079	0.00146791	0.00235084
Essen	9.47361e-05	0.00138202	6.44638e-05	3.55166e-05	6.56379e-05	0.000152057	6.84847e-05	0.000103071	6.17019e-05	9.57435e-05	0.00010032	0.000107916	0.000527874	0.000516503	3.99118e-05	9.4917e-05	0.000152669	0	0.000140465	8.23928e-05	0.000157339	8.11364e-05	0.000140885	5.48841e-05	5.14763e-05	0.000307316	6.78677e-05	4.65558e-05	0.000872834	0.000497265	9.54046e-05	0.000130251	5.18624e-05	0.000194549	0.000117875	6.10589e-05	0.000190673	0.000255103	3.63807e-05	8.92725e-05	0.000111255	0.000182862	6.39329e-05	0.000141628	6.24874e-05	8.54824e-05	7.70739e-05	0.000112111	0.000156766
Geel	0.000181954	0.00279863	0.000640298	9.55693e-05	0.00170707	0.000757897	0.000394171	0.000236433	0.000260581	0.000210154	0.000174532	0.000194624	0.000492662	0.000514376	0.000992063	0.000301395	0.000309916	0.000177103	0	0.000596511	0.00131844	0.000133784	0.0023728	0.000577479	0.000986581	0.000426516	0.000147525	0.000605854	0.000218332	0.000308339	0.00252547	0.000297331	0.00190014	0.000692032	0.00112913	0.000164734	0.000474919	0.000874869	0.00211692	0.000319991	0.00337581	0.000360441	0.000120203	0.000743238	0.00171512	0.0007582	0.000430019	0.000225117	0.000409968
Grobbendonk	0.000133638	0.00200229	0.000102383	3.14283e-05	0.000142371	0.000318043	0.000511504	0.000230449	0.000162228	0.000140527	0.000102428	0.000193849	0.000410572	0.000372115	8.46733e-05	0.000248435	0.000262843	9.2905e-05	0.000524118	0	0.000890731	9.23553e-05	0.00152224	0.000917859	0.000221292	0.000207383	0.000135135	0.000284401	0.000138238	0.00022496	0.00031187	0.000242537	0.000173702	0.000755103	0.000827696	0.000150519	0.000451951	0.000538336	0.000103518	0.000119279	0.000263124	0.000313499	7.92293e-05	0.00172493	0.000512432	0.000156193	0.000304702	0.000133867	0.000552184
Heist-op-den-Berg	0.000488087	0.00521808	0.000234278	5.88616e-05	0.000452963	0.000466697	0.00292506	0.000703112	0.0012464	0.000588085	0.000400496	0.000483908	0.000819858	0.000596515	0.000221704	0.00120016	0.00084804	0.00021103	0.00144354	0.00113072	0	0.000327771	0.00210242	0.00216541	0.0017101	0.000360766	0.000437982	0.00468365	0.00029217	0.000496341	0.000602738	0.000887004	0.000786342	0.0027267	0.000786637	0.000582025	0.000513658	0.00295025	0.000358282	0.000197335	0.000760595	0.00095467	0.000310957	0.00260529	0.00137551	0.000302974	0.00361875	0.000555326	0.0011008
Hemiksem	0.00304647	0.00566896	3.66926e-05	1.2094e-05	5.43147e-05	8.22437e-05	0.000155164	0.000580502	0.000236449	0.00169624	0.00120888	0.000433322	0.0005253	0.00019847	2.79436e-05	0.000534235	0.00148646	0.000101439	0.000136211	0.000102458	0.000315058	0	0.000158604	8.11613e-05	7.20604e-05	9.44154e-05	0.000506028	7.55647e-05	0.000158513	0.000380999	7.15861e-05	0.00139162	5.77139e-05	0.00067729	9.66254e-05	0.000385963	0.000114935	0.00128693	3.33304e-05	3.80523e-05	9.20885e-05	0.0014716	0.00230894	0.000260474	7.29017e-05	4.76718e-05	0.000216531	0.00137268	0.000390516
Herentals	0.000221102	0.00332121	0.000326461	7.87942e-05	0.000514185	0.000794066	0.000704224	0.000328314	0.000308541	0.000245393	0.000188963	0.000269828	0.000626617	0.000629494	0.000312207	0.000398658	0.000402602	0.000179198	0.00241839	0.00188902	0.00192553	0.000157013	0	0.00171454	0.000788836	0.000433842	0.000199218	0.000836069	0.000243632	0.000367668	0.00129004	0.000382043	0.000695844	0.00104105	0.00229504	0.000225268	0.000698657	0.00100361	0.000425215	0.00029533	0.000976841	0.000472765	0.000138517	0.00154708	0.00385401	0.000485908	0.000571532	0.000246508	0.00064785
Herenthout	0.000102116	0.00136002	7.19217e-05	1.8876e-05	0.00012185	0.000170979	0.00062064	0.00016421	0.000165639	0.000113925	8.08444e-05	0.000124656	0.000236807	0.000194457	6.60503e-05	0.00021642	0.000191107	5.82099e-05	0.000466131	0.000823916	0.00137116	6.96146e-05	0.00121979	0	0.000298532	0.000116606	9.83771e-05	0.000527378	8.27182e-05	0.000136535	0.000216913	0.000186572	0.000186399	0.000611721	0.000370891	0.000119307	0.000195381	0.000492407	9.65674e-05	6.75781e-05	0.000218164	0.000222291	6.23541e-05	0.00113815	0.000650522	0.000100785	0.000363765	0.000108348	0.000325399
Herselt	8.63535e-05	0.0011246	9.1272e-05	1.85678e-05	0.000239922	0.0001405	0.000236072	0.000109908	0.000175944	0.000105498	8.20581e-05	8.2532e-05	0.000172884	0.000144887	0.000102409	0.000166278	0.000143044	5.41574e-05	0.000751875	0.000204738	0.001116	6.15359e-05	0.00060713	0.000295311	0	0.000100865	6.93451e-05	0.000837907	6.9579e-05	0.000108415	0.000238051	0.00014463	0.000765041	0.000354981	0.000219612	8.38038e-05	0.000123146	0.000508109	0.000233931	6.05461e-05	0.00037995	0.0001628	5.79453e-05	0.000339355	0.000538135	0.000108673	0.000324607	0.000110179	0.000173374
Hoogstraten	0.000105264	0.00185052	0.000220897	0.000300465	0.000159718	0.000888092	0.000122995	0.000134908	8.89682e-05	0.000109427	0.000100444	0.000134082	0.000560032	0.00135615	0.000114942	0.000131292	0.000183462	0.000348881	0.000363642	0.000200168	0.000291711	8.27665e-05	0.000365951	0.000119914	0.000104508	0	8.48238e-05	9.24065e-05	0.000391685	0.000372092	0.000316715	0.000160553	0.000114051	0.000301997	0.000406433	8.167e-05	0.000736054	0.000346883	8.78417e-05	0.000747348	0.000287471	0.00022068	6.79129e-05	0.000276957	0.000152533	0.000363178	0.000124927	0.000120204	0.000244622
Hove (Antwerpen)	0.00124223	0.00838698	3.94793e-05	1.28881e-05	5.84402e-05	9.82394e-05	0.000291927	0.0074577	0.000292116	0.000752467	0.000336086	0.00152141	0.000653764	0.000236597	3.04387e-05	0.00120641	0.0083149	9.04187e-05	0.000162473	0.000163381	0.000462104	0.00055922	0.000218635	0.000124869	8.7451e-05	0.000104117	0	0.000101935	0.000152516	0.000378628	8.49074e-05	0.0047779	6.59702e-05	0.00196362	0.000128894	0.00201656	0.000152936	0.00139269	3.71226e-05	4.30668e-05	0.00010192	0.00838878	0.000408493	0.000501201	9.6574e-05	5.34425e-05	0.000325899	0.000465109	0.00113306
Hulshout	9.51559e-05	0.00121844	6.70552e-05	1.54074e-05	0.000142821	0.000124803	0.000409525	0.000131665	0.000214503	0.000114759	8.28959e-05	9.50132e-05	0.00018079	0.000142103	6.75739e-05	0.000208382	0.000164255	4.97056e-05	0.000494783	0.000267774	0.0021482	6.55147e-05	0.000660162	0.000535484	0.000867745	9.08446e-05	8.17314e-05	0	6.70677e-05	0.000109798	0.000183039	0.000167921	0.000298785	0.000479301	0.000216059	0.000103248	0.000124635	0.000577405	0.000122086	5.20941e-05	0.000240542	0.000186727	6.15471e-05	0.000500373	0.000529458	8.54534e-05	0.000500307	0.000113326	0.000214256
Kalmthout	0.000166832	0.00280671	7.94074e-05	4.15161e-05	8.44662e-05	0.000216882	0.000113268	0.000193923	9.64737e-05	0.000159211	0.00015845	0.000221122	0.00152461	0.0010848	5.07202e-05	0.000161227	0.000285012	0.0011359	0.000197048	0.000138017	0.000247161	0.000141412	0.000217385	8.73161e-05	7.38896e-05	0.000407793	0.000126248	7.00133e-05	0	0.00161822	0.000131611	0.000233254	7.11893e-05	0.000326874	0.000182748	0.000108266	0.000343843	0.000409436	4.82364e-05	0.000117423	0.000146363	0.000349015	0.000106524	0.000246078	9.30445e-05	0.000110219	0.000123992	0.000177989	0.000307078
Kapellen	0.00048219	0.0087932	0.000116672	5.1716e-05	0.000137322	0.000320643	0.000244396	0.000571186	0.000217784	0.00041901	0.000401349	0.000747084	0.00745507	0.00142662	7.88192e-05	0.00040805	0.000869788	0.000785092	0.00034083	0.000274697	0.000518181	0.000413656	0.000403834	0.000174315	0.000138134	0.000486809	0.000374388	0.00013733	0.00237868	0	0.000212403	0.000663026	0.00012521	0.000874777	0.000313401	0.000292089	0.000560565	0.000975214	8.04995e-05	0.00015855	0.000239711	0.00109845	0.000287527	0.000550245	0.000170673	0.000161934	0.000269024	0.000447123	0.000849697
Kasterlee	8.67355e-05	0.00146595	0.000593198	8.53588e-05	0.000570536	0.000782995	0.000167108	0.000114817	0.000106734	9.71057e-05	8.22563e-05	9.9213e-05	0.000280689	0.000343995	0.000594897	0.000134855	0.000150724	0.000107199	0.00194819	0.000308988	0.000489656	6.44975e-05	0.00106027	0.000230363	0.000255821	0.000326502	7.11737e-05	0.000191746	0.000130822	0.000174293	0	0.000140781	0.000366613	0.000319807	0.000922673	7.64904e-05	0.000340776	0.000379451	0.000377228	0.000312517	0.00126232	0.000177428	5.64749e-05	0.00035126	0.000506187	0.000971542	0.000170182	0.000104241	0.000209008
Kontich	0.00485529	0.0125298	8.53594e-05	2.72871e-05	0.000129715	0.000200153	0.00059154	0.00437694	0.000800456	0.00288886	0.000983897	0.00163978	0.00114154	0.000452954	6.67313e-05	0.00344937	0.0104221	0.000188449	0.000348401	0.000314883	0.00100388	0.00170375	0.000446815	0.000256115	0.000197204	0.000211424	0.00531948	0.000226286	0.000302748	0.00070991	0.000179351	0	0.000147768	0.00341717	0.000258193	0.0043823	0.000291709	0.00393404	8.26818e-05	8.91576e-05	0.000222525	0.00783178	0.00142172	0.000921938	0.000204809	0.000113198	0.000773047	0.00144322	0.0015609
Laakdal	6.63135e-05	0.000941525	0.000130934	2.20191e-05	0.0004974	0.000157334	0.000141897	8.196e-05	0.000111104	7.97389e-05	6.60216e-05	6.46255e-05	0.000151304	0.000139613	0.000179131	0.000114121	0.000109131	5.34931e-05	0.00123825	0.000157417	0.000550571	4.86091e-05	0.000521888	0.000179907	0.000733193	0.000107512	5.18229e-05	0.000283409	6.56912e-05	9.65109e-05	0.000328304	0.000107634	0	0.000244831	0.000220847	5.97178e-05	0.00011769	0.000355274	0.000717621	6.97005e-05	0.000719846	0.000125261	4.4976e-05	0.000234522	0.000424164	0.000142811	0.000181538	8.64408e-05	0.000131729
Lier	0.00135194	0.0106188	0.000180188	5.57889e-05	0.00028017	0.000438791	0.00334004	0.00368949	0.00151408	0.00135279	0.000718659	0.0017767	0.00161659	0.000832938	0.000147029	0.00495213	0.00310529	0.000285626	0.000818542	0.00104487	0.00314693	0.00077925	0.00123951	0.000919997	0.000508528	0.000405502	0.00204938	0.000687906	0.000423871	0.00091756	0.000417425	0.00329317	0.000350086	0	0.000657881	0.00359231	0.000646531	0.00473073	0.000190527	0.000188302	0.000484104	0.0034743	0.000691884	0.00407001	0.000578258	0.000244643	0.00245233	0.00101346	0.00452006
Lille	0.000120272	0.00196762	0.000248079	7.85822e-05	0.000262196	0.00108534	0.000268439	0.000177909	0.00013566	0.00012862	0.000103573	0.000159134	0.000442819	0.000570513	0.000188879	0.000191416	0.000221502	0.00013493	0.000971495	0.000835086	0.000641142	8.76192e-05	0.00182965	0.000404544	0.000239147	0.000427243	0.000108001	0.000230106	0.000184106	0.000256797	0.000943907	0.000202065	0.000247346	0.000497777	0	0.00011425	0.000813835	0.000476649	0.000181128	0.00034081	0.000512581	0.000264013	7.48483e-05	0.000669437	0.000593601	0.000451125	0.000225857	0.00013153	0.00036913
Lint	0.000794991	0.0041905	3.79788e-05	1.19163e-05	5.85999e-05	9.0182e-05	0.000365982	0.00219077	0.000402951	0.000699504	0.000282615	0.000633917	0.000441859	0.000191813	3.02151e-05	0.00262192	0.00207733	7.34528e-05	0.000162749	0.000163562	0.00053448	0.000372063	0.00022039	0.000137254	9.62933e-05	9.05862e-05	0.00164621	0.000117129	0.000117215	0.000261547	8.28631e-05	0.00301002	6.94759e-05	0.00263946	0.000122957	0	0.000132107	0.00167014	3.8245e-05	3.953e-05	0.000100866	0.00199805	0.000330489	0.000525787	0.000101751	5.07588e-05	0.000439517	0.00041528	0.000855717
Malle	0.000143748	0.00268761	0.000161932	8.89027e-05	0.000153747	0.000910706	0.000214528	0.000218121	0.000121991	0.000143846	0.000119344	0.000223525	0.000863184	0.00187175	0.000103435	0.000196418	0.000274599	0.000230519	0.000442892	0.000476401	0.000447759	0.000107303	0.000638975	0.000218133	0.000137209	0.000826421	0.000131796	0.000136266	0.000361764	0.000466986	0.000361247	0.000235716	0.000134166	0.000513084	0.000859988	0.000126774	0	0.000467229	9.42569e-05	0.000369414	0.000285826	0.000336087	8.68098e-05	0.000567173	0.000235179	0.000278743	0.000184801	0.000146981	0.000484469
Mechelen	0.00259452	0.0137248	0.000256346	7.29736e-05	0.000443387	0.000508313	0.00166872	0.00212479	0.0107838	0.00461189	0.00224868	0.00123371	0.00165838	0.000901981	0.000215752	0.00640422	0.00320013	0.000405536	0.00111676	0.000766144	0.00375689	0.0016363	0.00127551	0.000764882	0.000804317	0.000497025	0.00155322	0.000900554	0.000569992	0.00109272	0.00052945	0.0041681	0.000557282	0.00526522	0.000665399	0.00231509	0.000619972	0	0.00029384	0.000230485	0.000726632	0.0032484	0.00199641	0.00202217	0.00066177	0.000321615	0.00405729	0.00377686	0.00189176
Meerhout	3.74292e-05	0.000610358	0.000135919	1.797e-05	0.000869019	0.000125046	7.18924e-05	4.61776e-05	5.54237e-05	4.42862e-05	3.77663e-05	3.75406e-05	9.61853e-05	9.62164e-05	0.00025289	0.000688596	6.22315e-05	3.64675e-05	0.00121255	9.18217e-05	0.000258023	2.77592e-05	0.000317145	9.0734e-05	0.000218682	8.05247e-05	2.90059e-05	0.000113203	4.35402e-05	6.14286e-05	0.000322623	6.0268e-05	0.000674627	0.000134284	0.000157258	3.24852e-05	8.08742e-05	0.000191444	0	5.62063e-05	0.00117776	7.20794e-05	2.52467e-05	0.000129733	0.000216585	0.000134389	8.73948e-05	4.87613e-05	7.62745e-05
Merksplas	4.14954e-05	0.000810054	0.000192018	0.000293153	0.000104703	0.00124461	5.87243e-05	5.43775e-05	4.0056e-05	4.43769e-05	3.94826e-05	5.13019e-05	0.000186751	0.00034709	8.6391e-05	5.64478e-05	7.30319e-05	9.04055e-05	0.000249182	0.000106491	0.000149865	3.18254e-05	0.00022907	6.43578e-05	5.81506e-05	0.000646529	3.37356e-05	4.93112e-05	0.000105032	0.000117988	0.000273133	6.5323e-05	6.82694e-05	0.000134254	0.000292277	3.38186e-05	0.000303134	0.000155025	5.6706e-05	0	0.000199391	8.74509e-05	2.6714e-05	0.000133706	9.32353e-05	0.000433857	5.904e-05	4.84086e-05	0.000101253
Mol	0.000119542	0.00203255	0.000844207	8.26622e-05	0.00459885	0.000531823	0.000209412	0.000147031	0.000160767	0.000139322	0.000121543	0.000122793	0.000335591	0.000361029	0.00282702	0.000185467	0.000199441	0.000137274	0.00327702	0.000289671	0.000695959	8.97229e-05	0.000948973	0.000256623	0.000464401	0.000329997	9.23522e-05	0.000280582	0.000159527	0.000215975	0.00150893	0.000190326	0.000969408	0.00041212	0.000570538	0.000101039	0.000300776	0.000575371	0.00197883	0.000249637	0	0.000232271	8.05115e-05	0.000397095	0.000559695	0.000707488	0.000246321	0.000154806	0.000246146
Mortsel	0.00451613	0.0318827	0.000122312	4.08679e-05	0.000177517	0.000306799	0.000761743	0.0115305	0.000775467	0.00232057	0.00114357	0.00627052	0.00238138	0.000782384	9.29478e-05	0.00267961	0.0323492	0.000308666	0.000486724	0.000472911	0.00127485	0.00217519	0.000642277	0.000351207	0.000252609	0.000336313	0.0146535	0.000286775	0.00053286	0.00140161	0.000258233	0.0108181	0.000195169	0.00452859	0.000389819	0.00332037	0.000484217	0.00382254	0.000111302	0.000135647	0.000309753	0	0.00139203	0.00137312	0.000281159	0.000165667	0.000856839	0.00151595	0.00317695
Niel	0.00204939	0.00452419	3.14802e-05	9.97644e-06	4.83038e-05	6.80366e-05	0.000139261	0.000429627	0.00025727	0.00343089	0.00160597	0.000287331	0.000367081	0.000153215	2.44048e-05	0.000532457	0.000991921	7.79326e-05	0.000120331	8.62897e-05	0.000293189	0.00222352	0.000137534	7.13896e-05	6.67339e-05	7.59469e-05	0.000364501	6.98146e-05	0.000116744	0.000261326	6.16179e-05	0.00114085	5.2515e-05	0.000589834	8.10566e-05	0.00033561	9.12955e-05	0.00149886	2.9832e-05	3.13627e-05	8.13247e-05	0.00095691	0	0.000221389	6.4467e-05	4.03975e-05	0.000212834	0.00248505	0.000299257
Nijlen	0.00039803	0.00479756	0.000154599	4.75229e-05	0.000231887	0.000418322	0.00276018	0.000799216	0.000505657	0.000412585	0.00027312	0.000601472	0.000927411	0.000643881	0.000128497	0.000882434	0.000824904	0.000182571	0.000766103	0.00223708	0.00243237	0.000261244	0.00158346	0.00161539	0.000428284	0.000329253	0.000456163	0.00063101	0.00028067	0.000505798	0.000408649	0.000780467	0.000298271	0.00319796	0.000787021	0.00054914	0.000629005	0.0015728	0.000165864	0.000169304	0.000412569	0.000974713	0.000226191	0	0.000678223	0.000221028	0.0010226	0.0003658	0.00200515
Olen	9.18999e-05	0.00138928	0.000134257	2.86435e-05	0.000263215	0.00026215	0.000299909	0.000130716	0.000144756	0.000105099	8.09588e-05	0.000103771	0.000233841	0.000221244	0.000143162	0.000171313	0.000163465	6.8968e-05	0.0013651	0.000500325	0.00103164	6.513e-05	0.00249051	0.000698031	0.000582418	0.00015495	7.99721e-05	0.000556337	9.17251e-05	0.000139862	0.00049956	0.000158266	0.000472128	0.000428369	0.000574396	9.28358e-05	0.000220834	0.000459973	0.000246144	0.000102436	0.000487706	0.000190147	5.85783e-05	0.000562342	0	0.000183258	0.000275632	0.000106737	0.000240832
Oud-Turnhout	6.09184e-05	0.00128873	0.00124312	0.000166905	0.000331889	0.0010338	9.63391e-05	7.83755e-05	6.69448e-05	6.75479e-05	5.9613e-05	7.00339e-05	0.000230671	0.000329366	0.000374255	8.8116e-05	0.000106214	0.000103115	0.0007339	0.000168044	0.000278247	4.61027e-05	0.000467128	0.000114273	0.000124523	0.000414253	4.83815e-05	9.55892e-05	0.000118183	0.000145188	0.00111488	9.73537e-05	0.000169181	0.000209869	0.000492269	5.03238e-05	0.000289161	0.000260563	0.000164702	0.000566141	0.000695173	0.000126248	3.96453e-05	0.000210996	0.000201354	0	0.000101419	7.44333e-05	0.00014244
Putte	0.00031341	0.00272628	7.68721e-05	2.05657e-05	0.00014112	0.000155685	0.0011584	0.000426896	0.00151107	0.000403839	0.00024277	0.000260123	0.000374599	0.000235811	6.86151e-05	0.00103238	0.000521997	8.99657e-05	0.000401814	0.000319521	0.00269328	0.000200415	0.000525433	0.000414379	0.000372484	0.000134113	0.000274449	0.000568988	0.000129097	0.000230397	0.00017882	0.000593596	0.000209841	0.00172727	0.000234625	0.000416656	0.000184835	0.00241262	0.000102122	6.75759e-05	0.000234646	0.000567921	0.000200656	0.000907183	0.000294629	9.847e-05	0	0.000354357	0.000537085
Puurs	0.00141957	0.00571799	6.24271e-05	1.93547e-05	9.8063e-05	0.000126981	0.000240741	0.000545978	0.000508333	0.00311217	0.00529471	0.000379563	0.000574258	0.00026776	4.89999e-05	0.000787917	0.00108016	0.000144764	0.000233952	0.000152223	0.000543171	0.00141411	0.000254004	0.000130165	0.000133611	0.000140812	0.000431649	0.000134975	0.000204291	0.000420018	0.000118711	0.00122472	0.000106283	0.000894977	0.000148689	0.000440515	0.000160858	0.0028505	6.04838e-05	5.9498e-05	0.000162101	0.00109197	0.00268994	0.000372207	0.00012274	7.83624e-05	0.000395071	0	0.000445794
Ranst	0.000657654	0.00776204	0.000109679	3.83117e-05	0.000151603	0.000309969	0.000892621	0.00218525	0.000423144	0.000565814	0.000354532	0.00213976	0.00168078	0.000735174	8.39444e-05	0.00108771	0.00175938	0.000213614	0.000445628	0.000690954	0.00112703	0.000414577	0.000702926	0.000428468	0.000221826	0.000305072	0.00108488	0.000271265	0.0003728	0.000827157	0.000251396	0.00139217	0.000170443	0.00396674	0.000448028	0.000964581	0.000568441	0.00160533	9.92753e-05	0.000132367	0.00026826	0.00226429	0.000323047	0.00219917	0.000294651	0.000155814	0.000632843	0.000463947	0
Ravels	5.06192e-05	0.000940179	0.000754369	0.000276687	0.000214993	0.00062049	7.07154e-05	6.26752e-05	5.25656e-05	5.58283e-05	5.07913e-05	5.72823e-05	0.000192694	0.000282404	0.000207571	6.95054e-05	8.61394e-05	0.000101618	0.000400265	0.000113298	0.000194699	3.90703e-05	0.00027725	7.76233e-05	8.55099e-05	0.000412654	3.95001e-05	6.6707e-05	0.000109311	0.000126493	0.000439195	7.86114e-05	0.000111481	0.000158278	0.000278329	4.04326e-05	0.000218692	0.000201399	0.000323311	0.000510564	0.000402414	0.000102018	3.3499e-05	0.000150325	0.000124198	0.0011963	7.63257e-05	6.2405e-05	0.000110244
Retie	3.82153e-05	0.000681224	0.000872221	4.57222e-05	0.000500543	0.000270233	6.27853e-05	4.7614e-05	4.64151e-05	4.35111e-05	3.84241e-05	4.1068e-05	0.000120899	0.000145225	0.00123288	5.6877e-05	6.45515e-05	5.29371e-05	0.000703989	9.63807e-05	0.000192516	2.89074e-05	0.000293747	7.57634e-05	0.000105013	0.000150518	2.98004e-05	7.23993e-05	6.03417e-05	7.78207e-05	0.000735464	6.05192e-05	0.000170052	0.000128979	0.000225975	3.18125e-05	0.000122489	0.000170986	0.000213427	0.000134749	0.00107726	7.57574e-05	2.54674e-05	0.000126353	0.000149781	0.000558057	7.0158e-05	4.83085e-05	8.20258e-05
Rijkevorsel	7.72227e-05	0.00144409	0.000150418	0.00013629	0.000115254	0.00102923	0.000103355	0.000105819	6.73117e-05	7.95963e-05	6.98536e-05	0.00010529	0.000424509	0.0011269	8.34847e-05	0.000101542	0.000139678	0.000180268	0.000295824	0.000195184	0.000238763	5.92515e-05	0.000337948	0.000106264	8.23441e-05	0.00144132	6.53733e-05	7.53331e-05	0.000237923	0.000258296	0.000270621	0.000121848	8.77067e-05	0.000246674	0.000445496	6.34474e-05	0.00107352	0.000260407	6.63259e-05	0.000601186	0.000213838	0.000169005	4.85549e-05	0.00024722	0.000132509	0.000274875	9.84716e-05	8.49324e-05	0.000207144
Rumst	0.00168223	0.00492466	4.94643e-05	1.49973e-05	7.94954e-05	0.000106124	0.000309412	0.0008128	0.000772117	0.00389779	0.000811196	0.000425337	0.000469086	0.000216483	3.97284e-05	0.00197853	0.00151054	9.79557e-05	0.000204699	0.000156441	0.000611159	0.000831606	0.000243884	0.000139243	0.000126388	0.000110037	0.000678331	0.000140771	0.00014576	0.000309125	0.000101503	0.00243098	9.29751e-05	0.00135646	0.000135227	0.000943715	0.000140553	0.00431791	5.09495e-05	4.79405e-05	0.000133442	0.00139754	0.00116976	0.000431215	0.000117762	6.35917e-05	0.00053407	0.00147163	0.000529168
Schelle	0.00261339	0.00456317	2.69557e-05	8.66062e-06	4.07765e-05	5.95036e-05	0.000119963	0.000419119	0.000203284	0.00219316	0.00110832	0.000287018	0.000348799	0.00013843	2.07377e-05	0.000454214	0.00104463	6.9742e-05	0.000102561	7.57051e-05	0.000247793	0.00386448	0.000118807	6.14182e-05	5.57049e-05	6.70813e-05	0.000364778	5.859e-05	0.000106879	0.000248048	5.27615e-05	0.00112673	4.40236e-05	0.000526676	7.07806e-05	0.000307468	8.15985e-05	0.00116568	2.51245e-05	2.73621e-05	6.90495e-05	0.00100167	0.00428043	0.000195517	5.50417e-05	3.48506e-05	0.000175989	0.00146965	0.000279309
Schilde	0.000426703	0.00664307	0.000126924	5.12125e-05	0.000156038	0.000415357	0.000505399	0.000884338	0.000270857	0.000377642	0.000278531	0.00115609	0.00281511	0.00130756	9.136e-05	0.000559132	0.000969639	0.000289665	0.000449794	0.000675155	0.000808579	0.000300811	0.000693752	0.000343822	0.00018964	0.000443975	0.000502907	0.00021291	0.000556699	0.00117329	0.000282096	0.000757115	0.000159485	0.00162984	0.00054629	0.00042663	0.00100944	0.00106354	9.9048e-05	0.000179536	0.000279644	0.00125154	0.000228695	0.00139476	0.000274952	0.00018812	0.000396453	0.000346727	0.00291988
Schoten	0.00104938	0.0178446	0.000185868	7.52001e-05	0.000231546	0.000550993	0.000650047	0.00188296	0.000462791	0.000841381	0.000653007	0.00346925	0.0131298	0.00209171	0.000131466	0.00101246	0.00242379	0.000634895	0.000629889	0.00068096	0.00114891	0.000782058	0.000854134	0.000406264	0.000269859	0.000685559	0.00113829	0.000290214	0.00140183	0.00457031	0.000380896	0.00169362	0.000229559	0.00251285	0.000636813	0.000812289	0.00112491	0.00201863	0.000141818	0.000250322	0.000410796	0.00327557	0.000541475	0.00152437	0.000350632	0.000265335	0.000606401	0.000781228	0.00357145
Sint-Katelijne-Waver	0.000793282	0.00521064	8.24414e-05	2.35945e-05	0.000140392	0.000175679	0.000936065	0.000979074	0.00320904	0.00109857	0.000503241	0.000499354	0.000585099	0.000313029	6.9374e-05	0.00508442	0.00125436	0.000125385	0.000383906	0.000320372	0.00166132	0.000454336	0.000490214	0.000328783	0.000278428	0.000165467	0.000673228	0.000353106	0.000183809	0.000362533	0.000181517	0.0016707	0.000182968	0.00332613	0.000246184	0.00129159	0.000225827	0.00648053	9.50643e-05	7.71752e-05	0.000235943	0.00128638	0.000484331	0.00097402	0.000248144	0.000106511	0.00228751	0.000789157	0.000873489
Stabroek	0.000273341	0.0041248	6.54899e-05	2.84784e-05	7.80298e-05	0.000164931	0.000129037	0.000279292	0.000122345	0.000245961	0.000260785	0.000332308	0.00198796	0.00062794	4.43015e-05	0.000217802	0.00044703	0.000540115	0.000185305	0.00013354	0.000275165	0.000249017	0.000207493	8.90638e-05	7.62154e-05	0.000253796	0.000188363	7.39396e-05	0.00127117	0.00344555	0.000113969	0.000352208	6.99721e-05	0.000436086	0.00015708	0.00015101	0.000255194	0.000551638	4.52058e-05	8.37924e-05	0.000134227	0.000549554	0.000174635	0.000266763	9.00618e-05	8.8272e-05	0.000145419	0.000279498	0.000378148
Turnhout	0.000201631	0.00393669	0.00218647	0.00063547	0.000850567	0.00471135	0.000318123	0.000262566	0.000215731	0.000220981	0.000194234	0.000237822	0.000783941	0.0011767	0.000853987	0.000289101	0.00035231	0.000348744	0.00201894	0.000577481	0.000874706	0.000152826	0.00149979	0.000377122	0.000378981	0.00153232	0.000162642	0.000302364	0.000405884	0.000492675	0.00300039	0.000321214	0.000488673	0.000687405	0.00177804	0.000167969	0.00108792	0.000822015	0.000450298	0.00261348	0.00172136	0.000418917	0.000130803	0.00070342	0.000633223	0.00886414	0.000326223	0.00024153	0.000482264
Vorselaar	7.97198e-05	0.00128723	8.73126e-05	2.60621e-05	0.00011637	0.000288197	0.000252443	0.000128781	9.66272e-05	8.48853e-05	6.41424e-05	0.000110307	0.000261148	0.000267755	7.24402e-05	0.000140964	0.000152695	6.52926e-05	0.000457331	0.00168606	0.000534034	5.60897e-05	0.00154386	0.00049339	0.000158829	0.000163083	7.64411e-05	0.000184243	9.4187e-05	0.000145531	0.000296487	0.00014069	0.000135997	0.000402447	0.00101062	8.38853e-05	0.000349581	0.000328577	8.52521e-05	0.00010271	0.000220287	0.000182009	4.81787e-05	0.000726744	0.000440715	0.0001386	0.000175769	8.32116e-05	0.000289711
Vosselaar	6.30215e-05	0.00129335	0.000353802	0.000148296	0.000203433	0.00311236	0.000104803	8.52739e-05	6.61878e-05	6.81351e-05	5.86857e-05	7.80466e-05	0.000261584	0.000419636	0.000180185	9.15704e-05	0.000112763	0.000104966	0.000573035	0.000214242	0.000278553	4.73095e-05	0.000530708	0.000127921	0.00011212	0.00050946	5.22404e-05	9.41837e-05	0.000128943	0.000159064	0.000830771	0.000102013	0.000135575	0.000225909	0.000816371	5.3737e-05	0.000455888	0.000253764	0.000115939	0.000914719	0.000413818	0.00013488	4.01408e-05	0.000243771	0.000205612	0.00105751	0.000102175	7.32409e-05	0.00016392
Westerlo	0.000140956	0.00196603	0.000206801	3.94771e-05	0.000562715	0.000309352	0.000379565	0.000183697	0.000250609	0.000167996	0.000132829	0.000142313	0.000315686	0.000283442	0.000248337	0.000259864	0.000237984	0.000101346	0.00219201	0.000418171	0.00158121	0.000101194	0.00149171	0.000566848	0.00264287	0.000205366	0.000114993	0.00103368	0.00012949	0.000196465	0.000606709	0.000235801	0.0020605	0.000582413	0.000507189	0.000135303	0.000251415	0.000767487	0.000635947	0.00013092	0.000929428	0.000273246	9.34649e-05	0.000609158	0.00158896	0.000248702	0.000452415	0.000175919	0.000304666
Wijnegem	0.000376317	0.00684184	5.67186e-05	2.16349e-05	7.34837e-05	0.000166704	0.000259251	0.000892564	0.000169514	0.000296165	0.000209136	0.00196005	0.00216831	0.000539136	4.115e-05	0.000404452	0.000988093	0.000157982	0.000206464	0.000250041	0.000422054	0.00026034	0.000294539	0.000149571	9.24726e-05	0.000190449	0.000502179	0.000103406	0.000316449	0.000883766	0.0001213	0.000673685	7.59896e-05	0.00109836	0.000208585	0.000346396	0.000334694	0.000729751	4.58506e-05	7.35937e-05	0.000130659	0.00137445	0.000183267	0.000620414	0.000120706	8.09915e-05	0.000227994	0.000258752	0.00207981
Willebroek	0.00185117	0.00656652	7.28805e-05	2.20151e-05	0.000117685	0.000149563	0.000348007	0.000766384	0.000904793	0.00617185	0.0021869	0.000474329	0.000637037	0.000303199	5.83257e-05	0.0014186	0.00146096	0.00015027	0.000289371	0.000197044	0.000764888	0.00130702	0.000323991	0.000174706	0.000175569	0.000159131	0.000612041	0.000184317	0.000215252	0.000442095	0.000143678	0.00189533	0.000133698	0.00133412	0.000182756	0.000712843	0.000190296	0.00538533	7.41717e-05	6.88518e-05	0.000195103	0.00142964	0.00245009	0.000505322	0.00015816	9.19914e-05	0.000615723	0.0050923	0.000587497
Wommelgem	0.00058943	0.00819431	7.11633e-05	2.57315e-05	9.61844e-05	0.000200882	0.00042227	0.00197356	0.000266248	0.000455204	0.000292993	0.00438671	0.00177365	0.00056085	5.30132e-05	0.000706066	0.00175669	0.000173008	0.000273589	0.00034645	0.000631277	0.000378779	0.000398408	0.00021792	0.000130316	0.000216501	0.00101196	0.000150848	0.000322181	0.000829192	0.000155554	0.00117883	0.000103496	0.00203562	0.000264723	0.000667486	0.000375414	0.00112087	6.10632e-05	8.76512e-05	0.000170277	0.00247562	0.000272399	0.000965626	0.000166339	0.000100528	0.000360026	0.000373167	0.00472047
Wuustwezel	0.000153125	0.00279691	0.000125954	8.30995e-05	0.000118884	0.000407139	0.000137502	0.000193643	0.000104993	0.00015089	0.0001421	0.00021092	0.00124076	0.00280616	7.58308e-05	0.000168991	0.00027009	0.000872331	0.000280816	0.00019461	0.000303542	0.000123888	0.000311142	0.000116244	9.55114e-05	0.00102467	0.000122816	8.92344e-05	0.0014407	0.000900062	0.000205326	0.000226453	9.55295e-05	0.000382481	0.00029546	0.000110549	0.000674976	0.000429386	6.74322e-05	0.000235086	0.000209705	0.000329877	9.6905e-05	0.000310809	0.000129662	0.000185547	0.000140503	0.000165369	0.000341754
Zandhoven	0.000208225	0.00301158	9.94912e-05	3.61565e-05	0.000127289	0.000335027	0.00051142	0.000411362	0.000190703	0.000202826	0.000145698	0.000391935	0.000801617	0.000621742	7.56469e-05	0.000348726	0.000441859	0.000138849	0.000405319	0.00122829	0.000746205	0.000143235	0.000789747	0.000436751	0.000172424	0.000274686	0.000234303	0.000208368	0.000228555	0.000402537	0.00025391	0.000383146	0.000140082	0.00112344	0.000598631	0.000237937	0.000721543	0.000674494	8.56865e-05	9.70732e-05	0.000231064	0.000542589	0.000117176	0.00187835	0.000295494	0.000151108	0.000320451	0.000187331	0.00131429
Zoersel	0.00022614	0.00387625	0.000221417	9.9978e-05	0.000231115	0.00109007	0.000402055	0.000364068	0.00020286	0.000226478	0.000180644	0.000363416	0.00117104	0.00171095	0.000151914	0.000330141	0.000441177	0.000273363	0.000711544	0.00109892	0.00079049	0.00016505	0.00120338	0.000430411	0.000232295	0.000798802	0.000217278	0.000242131	0.000430689	0.000617869	0.000553377	0.00038203	0.000217641	0.000902189	0.00161505	0.000213765	0.00426287	0.000751142	0.000148058	0.000409498	0.000430197	0.00053909	0.000134724	0.00113983	0.000426267	0.000373195	0.000319837	0.000225709	0.000869635
Zwijndrecht	0.00116671	0.00559155	6.67422e-05	2.40287e-05	9.12078e-05	0.000159095	0.000214913	0.000734175	0.000250786	0.000834604	0.000905535	0.000809342	0.0015863	0.000463114	4.83918e-05	0.00052313	0.00154487	0.000263948	0.000227672	0.000195266	0.000444149	0.00138821	0.000264392	0.000124813	0.000106846	0.000201832	0.000556385	0.000108805	0.000457509	0.00136601	0.000126198	0.00113173	9.04363e-05	0.000887486	0.000174584	0.00038726	0.000237113	0.00128881	5.43354e-05	7.50031e-05	0.000156884	0.00184869	0.000706387	0.000408137	0.000116451	8.83341e-05	0.000265613	0.00090263	0.000663885
[truncated: 22 more columns]
